1 **Ocular biomarker profiling after complement factor I gene therapy in geographic**  
2 **atrophy secondary to age-related macular degeneration**

3

4 Thomas M Hallam<sup>1,2\*</sup>, Emanuela Gardenal<sup>1,2</sup>, Fraser McBlane<sup>3</sup>, GaEun Cho<sup>4</sup>, Lucy  
5 Lee Ferraro<sup>4</sup>, Eva Pekle<sup>1,5</sup>, Darlene Lu<sup>6</sup>, Kate Carney<sup>1,3</sup>, Claire Wenden<sup>1,3</sup>, Hannah  
6 Beadsmoore<sup>1,3</sup>, Sergio Kaiser<sup>5</sup>, Lauren Drage<sup>1,7</sup>, Thomas Haye<sup>1,7</sup>, Iris Kassem<sup>8</sup>, Nalini  
7 Rangaswamy<sup>8</sup>, Ma'en Obeidat<sup>5</sup>, Cyndy Grosskreutz<sup>2</sup>, Magali Saint-Geniez<sup>2</sup>, David H  
8 Steel<sup>9</sup> and Robert E MacLaren<sup>10</sup> on behalf of FOCUS Principal Investigators, Scott  
9 Ellis<sup>1,2</sup>, Claire L Harris<sup>1,2</sup>, Stephen Poor<sup>4\*</sup>, Amy V Jones<sup>1,4\*</sup>

10

11 <sup>1</sup> Gyroscope Therapeutics Ltd, A Novartis Company

12 <sup>2</sup> Translational Research, Ophthalmology, BioMedical Research, Novartis

13 <sup>3</sup> Pharmacokinetic Sciences, Translational Medicine, BioMedical Research, Novartis

14 <sup>4</sup> Clinical Development, Global Drug Development, Novartis

15 <sup>5</sup> Biomarker Development, Translational Medicine, BioMedical Research, Novartis

16 <sup>6</sup> Biostatistics, Global Drug Development, Novartis

17 <sup>7</sup> Cell and Gene Therapies, TRD, Novartis

18 <sup>8</sup> Ophthalmology, Translational Medicine, BioMedical Research, Novartis

19 <sup>9</sup> Bioscience Institute, Newcastle University, Newcastle Upon Tyne, UK; Sunderland  
20 Eye Infirmary, Sunderland, UK

21 <sup>10</sup> Nuffield Laboratory of Ophthalmology and Oxford Eye Hospital, NIHR Oxford  
22 Biomedical Research Centre, Oxford University Hospitals NHS Foundation Trust,  
23 Oxford, UK

24

25 The FOCUS Principal Investigator group are listed in the Acknowledgements.

26

27 \*Corresponding authors.

28

29 Keywords: complement system, age-related macular degeneration, gene therapy,  
30 biomarker analysis, vitreous humor

31

32

33

34

NOTE: This preprint reports new research that has not been certified by peer review and should not be used to guide clinical practice.

35 **Abstract**

36

37 **Objective:** Complement biomarker analysis in ocular fluid samples from subjects with  
38 geographic atrophy (GA) in a Phase I/II clinical trial of subretinal AAV2 complement  
39 factor I (*CFI*; FI) gene therapy, PPY988 (formerly GT005), to understand target  
40 pharmacokinetics/pharmacodynamics. Clinical findings were subsequently utilized to  
41 investigate the therapeutic dose in an *in vitro* complement activation assay.

42 **Design, setting and participants:** Biomarker data were evaluated from 28 subjects  
43 in FOCUS, a Phase I/II clinical trial evaluating the safety and efficacy of three  
44 ascending doses of PPY988.

45 **Main outcomes and measures:** Vitreous humor (VH), and aqueous humor (AH) from  
46 subjects before surgery and at serial timepoints (week 5 or 12, 36, 96) were evaluated  
47 for changes in levels of intact complement factors I, B and H (FI, FB, FH) components  
48 C3, C4, and C1q and breakdown products (Ba, C3a, C3b/iC3b, C4b) using validated  
49 assays and OLINK<sup>®</sup> proteomics.

50 A modified *in vitro* assay of complement activation modelling VH complement  
51 concentrations was used to compare PPY988 potency to the approved intravitreal C3  
52 inhibitor pegcetacoplan (Apellis) and complement Factor H (FH).

53 **Results:** An average 2-fold increase in VH FI was observed post-treatment at week  
54 36 and week 96. This correlated with a marked post-treatment reduction in VH  
55 concentration of the FB breakdown product Ba and Ba:FB ratio, but minimal changes  
56 in C3a and C3b/iC3b levels. Variable concordance in complement biomarker levels in  
57 VH versus AH suggest AH is not a reliable proxy for VH for complement activation.  
58 During the experimental comparison of doses, a 2-fold increase of FI achieved in the  
59 vitreous had only a minor effect on the complement amplification loop *in vitro*,  
60 indicating limited impact [IC<sub>50</sub>: 1229nM]. Pegcetacoplan completely blocks C3a  
61 generation at concentrations much lower than the estimated trough level for monthly  
62 intravitreal injections [IC<sub>50</sub>: 2nM]. Supplementation with FH in the assay revealed  
63 similar potency to pegcetacoplan [IC<sub>50</sub>: 6nM].

64 **Conclusions and relevance:** PPY988 subretinal gene therapy may not have  
65 provided sufficient FI protein to meaningfully modulate complement activation to slow  
66 GA growth. Reviewing VH biomarkers is important for understanding target  
67 expression, pathway engagement, and determining optimal dose, thereby informing  
68 future clinical development.

69

70 ABBREVIATIONS

71

|     |      |                                     |
|-----|------|-------------------------------------|
| 72  | AEs  | Adverse events                      |
| 73  | AH   | Aqueous humor                       |
| 74  | AMD  | Age-related macular degeneration    |
| 75  | AP   | Alternative Pathway                 |
| 76  | BL   | Baseline                            |
| 77  | C3   | Complement component 3              |
| 78  | cDNA | Complementary deoxyribonucleic acid |
| 79  | CR1  | Complement receptor 1               |
| 80  | CS   | Complement system                   |
| 81  | DAF  | Decay-accelerating factor           |
| 82  | EDTA | Ethylenediaminetetraacetic acid     |
| 83  | FAF  | Fundus autofluorescence             |
| 84  | FB   | Factor B                            |
| 85  | FD   | Factor D                            |
| 86  | FDA  | Food and Drug Administration        |
| 87  | fdr  | False discovery rate                |
| 88  | FH   | Factor H                            |
| 89  | FI   | Factor I                            |
| 90  | GA   | Geographic atrophy                  |
| 91  | GMP  | Good Manufacturing Process          |
| 92  | IVT  | Intravitreal                        |
| 93  | LLOQ | Lower limit of quantification       |
| 94  | LOD  | Limit of detection                  |
| 95  | LPS  | Lipopolysaccharide                  |
| 96  | MBL  | Mannose binding lectin              |
| 97  | MCP  | Membrane cofactor protein           |
| 98  | NPX  | Normalized protein expression       |
| 99  | PK   | Pharmacokinetics                    |
| 100 | RCA  | Regulators of complement activation |
| 101 | RPE  | Retinal pigment epithelium          |
| 102 | RV   | Rare variant                        |

|     |      |                                    |
|-----|------|------------------------------------|
| 103 | SDS  | Subretinal delivery system         |
| 104 | TP   | Total protein                      |
| 105 | TVSI | Transvitreal surgical intervention |
| 106 | UK   | United Kingdom                     |
| 107 | ULOQ | Upper limit of quantification      |
| 108 | US   | United States                      |
| 109 | VH   | Vitreous humor                     |
| 110 |      |                                    |

## 111 Introduction

112

113 Age-related macular degeneration (AMD) is a leading cause of blindness,  
114 particularly in developed countries. In the United States (US) alone, there are  
115 approximately 18 million individuals aged 40 and above with early-stage AMD, and 1.5  
116 million with late-stage AMD, which includes geographic atrophy (GA) and/or  
117 neovascular AMD <sup>1</sup>. GA is a condition characterized by the progressive loss of  
118 photoreceptors, retinal pigment epithelium (RPE), and underlying choriocapillaris,  
119 resulting in a central scotoma <sup>2</sup>. Reduced vision can significantly impact activities of  
120 daily living and quality of life <sup>3,4</sup>. There have been two recent Food and Drug  
121 Administration (FDA)-approved therapies that inhibit complement activity, with a  
122 modest slowing of GA growth <sup>5,6</sup>. However, they require life-long monthly or bimonthly  
123 intravitreal (IVT) injections and have so far exhibited limited functional efficacy that  
124 present challenges for long term compliance <sup>7</sup>. Therefore, a one-time gene therapy  
125 that provides long-lasting efficacy equivalent to or better than repeated IVT therapies  
126 is a promising avenue for exploration.

127 One such gene therapy, called PPY998 (formerly GT005), is a subretinal gene  
128 therapy that supplements complement factor I (*CFI*; FI) protein in the retinal layers  
129 where atrophy occurs <sup>8</sup>. A Phase II study (HORIZON, NCT04566445) was initiated,  
130 however a decision to stop the PPY988 program was taken by Novartis based on  
131 a recommendation from the independent Data Monitoring Committee following an  
132 overall benefit-risk assessment of available data from the program studies. [Press  
133 release: Novartis AG; September 11th 2023, : <https://www.novartis.com/news/qt005-ppy988-development-program-geographic-atrophy>]. This raises important questions  
134 about whether *CFI* was sufficiently expressed after subretinal gene therapy, whether  
135 there was evidence of modulation of intraocular complement activity, or if this  
136 modulation was sufficient to potentially alter the disease course. Such information is  
137 crucial to the retina community, as there are many companies developing complement  
138 modulating therapies for AMD <sup>9</sup>. Sharing the learnings from the PPY998 program  
139 would improve the risk-benefit analysis for these programs and help understand if new  
140 approaches differentiate from PPY998, justifying further clinical study of complement  
141 targets for GA.  
142

143 The complement system, specifically the alternative pathway (AP), plays an  
144 important role in the development of AMD, and increasing local FI concentration could

145 be a promising approach to regulate ocular complement activity. The AP is a part of  
146 the complement system that constantly surveys for foreign cells and debris and  
147 requires tight regulation to prevent inflammation and self-cell damage <sup>10</sup>. Regulatory  
148 proteins like factor H (FH), decay-accelerating factor (DAF; CD55), membrane  
149 cofactor protein (MCP; CD46), complement receptor 1 (CR1; CD35), and FI help  
150 control the AP, with FI being the only regulatory enzyme <sup>11</sup>. FI, expressed from the *CFI*  
151 gene, cleaves C3b by forming a trimolecular complex with cofactors FH for C3b, and  
152 MCP and CR1 for C3b and C4b <sup>12–18</sup>. Studies have shown that carriers of rare variants  
153 (RV) in *CFI* have increased risk of developing advanced AMD and more rapid disease  
154 progression <sup>19–23</sup>. *CFI* RV can result in low levels of serum FI (Type I variants) or  
155 normal levels with functional impairment (Type II variants) <sup>24,25</sup>. Research has also  
156 suggested that doubling serum FI levels may help control complement overactivation  
157 driven by other AMD risk genetic factors mapping to complement genes <sup>26</sup>. Based on  
158 these findings, clinical trials were conducted to explore the potential of sub-retinal  
159 delivery of AAV2-*CFI* as a gene therapy for treating dry AMD <sup>8</sup>.

160 The FOCUS study is a Phase I/II open-label study evaluating the safety, and  
161 dose response of three doses of PPY988 AAV2-*CFI* subretinal gene therapy in GA. To  
162 assess transgene pharmacokinetics and pharmacodynamics, vitreous humor (VH)  
163 and aqueous humor (AH) samples were collected at baseline (BL) and four time points  
164 up to 96 weeks after dosing and were evaluated for exploratory complement  
165 biomarkers. This report shares findings regarding change from baseline in FI and  
166 complement protein levels and activation, over time after vitrectomy and PPY988  
167 administration. Levels of FI achieved in VH from FOCUS subjects were then used in  
168 an *in vitro* simulated human vitreous complement activation assay, to gain insights on  
169 the therapeutic potencies of FI, C3 inhibitor pegcetacoplan (Syfovre, Apellis), and FH.  
170 We also offer critical learnings for other AMD complement gene therapy programs and  
171 a guide for future analyses of complement biomarker data in ocular samples.

172

## 173 **Methods**

174

## 175 **Ethics**

176 The FOCUS study was conducted in accordance with the tenets of the  
177 Declaration of Helsinki and all other local regulations, in accordance with the  
178 International Conference on Harmonization E6 Guidelines for Good Clinical Practice  
179 and with applicable local, state, and federal laws. Institutional review board or ethics  
180 committee approval was obtained, and the study was registered at ClinicalTrials.gov  
181 (reference: NCT03846193) and EudraCT (reference: 2017-003712-39). All subjects  
182 provided written informed consent to participate, and an independent data monitoring  
183 committee provided ongoing oversight.

184

## 185 **Study design**

186 FOCUS is an open-label first in human Phase I/II multicentre clinical trial to  
187 evaluate the safety, and dose response of PPY988 (AAV2-*CFI*)<sup>8</sup>, administered as a  
188 single subretinal injection in subjects with GA secondary to AMD, followed for up to  
189 240 weeks (5 years) post-dosing. Subjects were administered one of three doses to  
190 the study eye under local anaesthesia by a qualified vitreoretinal surgeon: 2E10 viral  
191 genome (vg; low), 5eE10 vg (medium) and 2E11 vg (high). At screening, a saliva  
192 sample was taken from subjects and extracted DNA was analysed for *CFI* RV using  
193 targeted next generation sequencing<sup>21</sup>. Genotyping results were not required at  
194 screening if already available through participation in a previous Gyroscope sponsored  
195 study. The term 'rare' was defined as variants that changed the *CFI* coding sequence,  
196 had  $\leq 1\%$  minor allele frequency in GnomAD non-Finnish Europeans (V2.1.1,  
197 accessed <http://gnomad.broadinstitute.org>), and were previously associated with *CFI*  
198 haploinsufficiency<sup>11</sup>. A detailed description of study design, route of administration,  
199 dose, number of subjects, biomarker matrices, sampling timing and methodology are  
200 provided in **Supplementary Methods and Supplementary Table 1**.

201

## 202 **Complement protein and total protein quantification**

203 AH and VH samples of subjects were taken on the treated eye immediately  
204 prior to subretinal surgery at baseline (BL) and at 5 or 12 weeks, 36, and 96 weeks  
205 post-treatment, as described in detail in **Supplementary Table 1**. Samples were  
206 rapidly frozen at  $-80\text{ }^{\circ}\text{C}$  and transported frozen for analysis. Prior to analysis, samples

207 were thawed and subjected to centrifugation at 17,000g for 10 minutes at 4°C. Samples  
208 were kept on ice during sample preparation.

209 Complement factors C2, C4b, C5, C5a, factor D, mannose binding lectin (MBL),  
210 FI, C1q, C3b/iC3b, C3, FH, FB and C4 were quantified in AH and VH using the  
211 MILLIPLEX Human Complement Panel 1 and 2 (cat. no. HCMP1MAG-19K and  
212 HCMP2MAG-19K, EMD Millipore Corporation, Billerica, MA) following extensive  
213 quality control and validation of calibration curves. Plates were read using the Luminex  
214 MagPix and xPONENT software (Luminex Corporation, Austin, TX). C5a was omitted  
215 from further analysis as measurements fell under the lower limit for quantification.

216 Complement factors C3a and Ba were quantified in AH and VH using MicroVue  
217 EIA kits (cat. no. A032 and A034, QuidelOrtho Corporation, San Diego, CA) following  
218 manufacturer instructions. Plates were read using a Tecan Sunrise absorbance  
219 microplate reader using the Magellan Tracker data analysis software (Tecan Trading  
220 AG, Switzerland).

221 Each assay was validated and considered fit for purpose. Sample processing  
222 and analyses were conducted in accordance with Good Clinical Laboratory Practice,  
223 the analytes or measurements that did not meet acceptance criteria (coefficient of  
224 variation of 20%, or 30% when results are below the lower limit of quantification but  
225 above limit of detection) were excluded from the final analysis. The number of  
226 successfully sampled subjects for each biomarker at each time-point is reported in  
227 **Supplementary Table 2.**

228 Total protein was quantified in AH and VH using the Quant-iT protein assay kit  
229 (cat. no. Q33210, Invitrogen, Thermo Fisher Scientific, Waltham, MA) as per the  
230 manufacturer's instructions. Plates were read using a Varioskan LUX fluorescent  
231 microplate reader using the SkanIt data acquisition software (Thermo Fisher Scientific,  
232 Waltham, MA).

233

### 234 ***In vitro* modelling the ocular complement system and potency assay**

235 The assay was performed using reagents from the Wieslab AP assay kit (cat.  
236 no. COMPLAP330, Svar Life Science AB, Sweden) and purified human serum  
237 complement proteins (Complement Technology Inc., Texas USA. All preparation steps  
238 were performed on ice. Serial dilutions of the test analytes FI, FH and pegcetacoplan  
239 were separately prepared and added to a mix of the complement components C3, FB,  
240 FH, FI and Properdin simulating the final concentrations measured in the VH baseline



241 of FOCUS subjects (*CFI* RV negative population). The simulated vitreous complement  
242 mix was transferred on the lipopolysaccharide (LPS) coated Wieslab plate on ice. FD  
243 was separately added to the mix, the plate was immediately put at 37°C and incubated  
244 for 1 hour. At the end of the incubation, the solution was transferred into a dilution plate  
245 and kept on ice, EDTA was added to each well to obtain a final 20mM concentration.  
246 Ba and C3a generated in the assay were measured by using the MicroVUE EIA kits  
247 (cat. no. A032 and A034, QuidelOrtho Corporation, San Diego, CA) following the  
248 manufacturer instructions. The ELISA plates were scanned using the Varioskan plate  
249 reader and analysed using the SkanIT software (Thermo Fisher Scientific, Waltham,  
250 MA). The *in vitro* FI potency comparability assay is described in **Supplementary**  
251 **Methods**. The trough level of pegcetacoplan in the VH after 27 days was calculated  
252 by halving the treatment dose of 15mg/eye 6 times (pegcetacoplan half-life 4.5 days),  
253 the number obtained was converted to µg/mL using an estimated volume of VH of 4  
254 mL<sup>27</sup>.

255

## 256 **Statistics**

257 All subject sample biomarker analyses were performed in R version 4.1.0. The  
258 analysis set consisted of all subjects who received subretinal delivery of PPY998 from  
259 cohorts 1 to 4 and had at least one non-missing biomarker assessment performed at  
260 BL and either week 36 or week 96. Given sparsity of data at week 5 and week 12, the  
261 data were combined, and the average value was used in instances where subjects  
262 had non-missing data from both visits. Concentrations values above the upper limit of  
263 quantification (ULOQ) was set to ULOQ and values below the lower limit of detection  
264 (LOD) were set to LOD. Please see Supplementary Tables 3-4 for limits.

265 Significance testing for the change in protein level from BL to week 36 or week  
266 96 were performed on the differences of log-transformed data with the non-parametric  
267 Wilcoxon rank-sum test. Means and standard error bars are shown in the respective  
268 figures. Correlations between VH and AH sampling, as well as between FI and other  
269 proteins, were summarized with the Spearman's Rank correlation coefficient. As  
270 analyses were exploratory in nature and hypothesis-generating, no adjustments for  
271 multiple testing were performed.

272 For the *in vitro* VH modelling assay, to calculate IC50s, 4-parameter logistic  
273 curves were generated using GraphPad Prism version 10.0.0 for Windows, GraphPad  
274 Software, Boston, Massachusetts USA, [www.graphpad.com](http://www.graphpad.com).

## 275 **Results**

276

### 277 **Biomarker detection in FOCUS subjects that received PPY988**

278 In FOCUS Part 1 and 2 (cohorts 1 to 4), 31 subjects received one of three doses  
279 of PPY988 via the standard subretinal delivery approach (**Supplementary Table 1**). A  
280 total of 97% of the ocular samples expected under the protocol were obtained prior to  
281 early termination of the study which triggered cessation of further ocular fluid sampling.  
282 A total of 88 VH, 63 AH and 45 plasma samples from 30 subjects were obtained at  
283 various timepoints including BL, and 5 or 12, 36 and 96 weeks post-treatment  
284 (**Supplementary Methods and Supplementary Tables 1 and 2**).

285 In FOCUS, PPY988 was well tolerated with no serious ocular AEs, some dose-  
286 related RPE changes in the bleb area were evident and there was no clinically  
287 significant vector-related inflammation. A full account of the FOCUS study safety and  
288 clinical data, as well as full Phase II PPY988 safety, efficacy and biomarker data will  
289 be reported separately following study completion.

290

### 291 **Vitrectomy for subretinal AAV-CFI gene therapy procedure results in sustained** 292 **loss of protein from the VH**

293 To test impact of total vitrectomy performed during transvitreal subretinal  
294 delivery of PPY988 (**Figure 1A and B**) influencing global proteomic matrix changes  
295 and biomarker analyses/interpretation, total protein (TP) measurements were  
296 obtained at BL and each sampling timepoint (according to sample availability). In VH,  
297 a ~30% reduction in TP from baseline was observed at either week 5 or 12 and week  
298 36 (NS,  $P=0.162$ ), with a significant >50% reduction identified at week 96 ( $P=0.033$ ),  
299 while there were minimal changes in AH TP at week 5/12, 36 or 96 (**Figure 1C**).  
300 Because VH TP was reduced post-operatively, we performed TP normalisation to  
301 compare the results with non-normalised data interpretation for VH but not AH.

302

### 303 **AAV2-CFI delivery results in a sustained increase in FI protein level in the VH** 304 **and AH**

305 Transgene expression was measured in VH and AH samples at weeks 5 or 12,  
306 36, and 96 after treatment with PPY988. On average, we identified a 2-fold increase  
307 in VH FI at week 36 compared to baseline, with non-TP normalized baseline  
308 concentrations of 500 ng/mL compared to 1000 ng/mL at week 36 (non-normalised

309 P<0.001; TP normalised increase ~2-fold (P=0.002)) (**Figure 2A, 2B**). The increase in  
310 FI concentration was sustained, with a ~2.5-fold increase in FI observed at week 96.  
311 (mean ~1250 ng/mL) (non-normalised P<0.001; TP normalised increase ~3-fold  
312 (P=0.002)). *CFI* RV (n=5) and non-*CFI* RV ('broad') (n=19) genotype groups  
313 demonstrate comparable magnitudes of absolute FI elevation post-treatment, with the  
314 overall *CFI* RV cohort FI starting concentration ~50% reduced (NS). Elevated FI  
315 expression in AH samples at week 36 (P<0.001) were sustained out to week 96  
316 (P<0.001) (**Figure 2C, 2D**). Lastly, there was a variable response to the three PPY988  
317 doses in both VH and AH with no significant dose effect observed (Figure 2C, 2D).

318

### 319 **Increased FI expression results in a reduction in Ba and Ba:FB in the VH**

320 To test for FI target engagement at the level of formation of the alternative  
321 pathway C3 convertase, we measured Ba and FB concentrations at each sampling  
322 week after subretinal delivery of PPY988. A reduction in Ba in the VH is indicative of a  
323 reduction in C3 convertase formation in the ocular environment. We observed that Ba  
324 levels were reduced by ~2-fold compared to baseline at week 36 and 2.5-fold at week  
325 96 in non-normalised data (week 36: P=0.004; week 96: P=0.003) (**Figure 3A**) and TP  
326 normalised data (week 36: P=0.002; week 96: P=0.038) (**Figure 3B**). To add  
327 confidence to this read-out by accounting for fluctuations in endogenous FB  
328 biosynthesis, ratios of intact complement proteins and their breakdown products were  
329 assessed as in previous studies<sup>28-30</sup>. Ba:FB ratio changes post-treatment reflected  
330 the raw data. When reviewing biomarker levels from both non-normalized and TP  
331 normalized datasets, a significant reduction in Ba:FB was observed at week 36 (both  
332 P<0.001) and at week 96 (non-TP normalized (P=0.001); TP normalized (P=0.033))  
333 (**Figure 3C, 3D**).

334

### 335 **Increased FI expression results in modest alterations in VH and AH complement** 336 **biomarker profiles**

337 To investigate the effect of PPY988 delivery on complement AP and classical  
338 pathway (CP) activity, a panel of biomarkers including FI, C3, FB, FH, C1q, Ba, C3a,  
339 C3b/iC3b, C4 and C4b were measured in the VH and AH (in addition to plasma) at BL,  
340 week 5 or 12, week 36 and week 96. The complete set of concentrations at BL are  
341 reported in the **Supplementary Table 3** (VH), **Supplementary Table 4** (AH), and  
342 **Supplementary Table 5** (plasma). In addition, Ba:FB, C3a:C3 and C3b/iC3b:C3 ratios

343 were calculated at each time-point. Baseline values for each biomarker with  
344 descriptive statistics are reported in **Supplementary Table 3** (VH) and  
345 **Supplementary Table 4** (AH), with baseline and post-treatment pairwise correlations  
346 between FI and biomarkers presented in **Supplementary Figure 1** (VH) and  
347 **Supplementary Figure 2** (AH). Fold changes in complement biomarker concentration  
348 from baseline are presented for each biomarker or ratio at each post-surgery sampling  
349 week in VH non-normalised data (**Figure 4A**), VH TP normalised data (**Figure 4B**) and  
350 AH non-normalised data (**Figure 4C**). In the non-normalised VH dataset, we observed  
351 reductions in Ba and Ba:FB, with a reduction in C1q possibly indicative of reduced  
352 ocular immune cell (e.g. microglial) activation <sup>31</sup> (**Figure 4A**). We detected no  
353 modulation of VH C3a and C4b. Although levels of C3b/iC3b per unit of C3 fall  
354 substantially at week 96 in both non-normalized (P=0.002) and TP-normalized  
355 (P=0.012) analyses (**Supplementary Figure 3**), pairwise correlation analyses reveal  
356 that no biomarkers or ratios were negatively correlated with increasing FI level at week  
357 36 or 96 post-treatment (**Supplementary Figures 1 and 2**). Minimal reduction of CP  
358 activity was indicated by C4b:C4 ratio analysis, however, this was not observed when  
359 normalizing for TP (**Supplementary Figure 4**). VH FB and FH concentrations do not  
360 fluctuate substantially from BL values after treatment with PPY988. Overall, TP  
361 normalisation did not substantially alter the interpretation of VH biomarkers with  
362 broadly similar trends observed (**Figure 4B**).

363

#### 364 **AH sampling is not reflective of VH complement activation profile**

365 Complement biomarker profiling in AH demonstrated increasing concentrations  
366 of a majority of biomarkers (**Figure 4C**), including for Ba, C1q, and C3a (at week 96)  
367 which was discordant with VH sampling data. Whether these components (C1q) and  
368 breakdown products (Ba, C3a) are generated locally, systemically, or diffusely from  
369 the retina or VH is unclear. A similar trend to VH was observed when considering the  
370 increase in AH C3 and associated fall in C3a:C3 and C3b/iC3b:C3 ratios at week 96  
371 in particular. However, in the case of AH, the increase in C3 was also observed at  
372 week 36, suggesting compartmentalization of response of the AH vs the VH. In line  
373 with these data, pairwise correlations between VH and AH levels of Ba, C3a and  
374 C3b/iC3b post-treatment are modest and variable (**Supplementary Figure 5**), with  
375 only FI consistently well correlated between the two ocular compartments.

376

377 **Proteomic analysis on VH using Olink provides supportive evidence for target**  
378 **expression and modest modulation of the complement system**

379 Olink proteomic analysis of the VH samples identified a 2-fold median increase  
380 in week 36 FI levels relative to baseline (**Supplementary Methods, Supplementary**  
381 **Figure 6a**). Further review of differentially expressed proteins revealed trends for  
382 elevation of additional complement components including factor B, properdin and C2  
383 (**Supplementary Figure 6b, Supplementary Table 6**).

384

385 **VH modelling of complement activation reveals inferior potency of FI vs**  
386 **pegcetacoplan**

387 By modelling the components of the VH based on median measurements of  
388 C3, FB, FH, FI (broad cohort measurements) and properdin (all measurements) at  
389 baseline in the FOCUS study, we compared the potency of FI, FH and the C3 inhibitor  
390 pegcetacoplan for their effectiveness in controlling the generation of C3a on an LPS-  
391 coated plate in a simulated ocular environment context (**Figure 5**). In this assay, C3  
392 is directly activated by O-antigens on LPS thus triggering activation to drive the AP  
393 amplification loop. A wide range of FI, FH and pegcetacoplan concentrations were  
394 titrated through an artificial VH matrix so that comparisons could be made to clinically  
395 relevant levels of both FI and pegcetacoplan. Serum purified FI was revealed to be of  
396 similar potency to FI expressed from Good Manufacturing Practice (GMP)  
397 manufactured PPY988 (**Supplementary Figure 7**). The trough level of pegcetacoplan  
398 at 27 days was estimated using injection dose and half-life information available on  
399 the Syfovre™ prescribing information datasheet. No diffusion data in human was  
400 available so this was not counted in the trough calculation. The concentration obtained  
401 was similar to that reported in the pegcetacoplan rabbit pharmacokinetics (PK) study  
402 and PK/PD prediction study published by Apellis<sup>32,33</sup>. Pegcetacoplan vitreal trough  
403 level was compared to the 1<sup>st</sup> and 3<sup>rd</sup> quartile increase (at week 36 vs BL) in FI  
404 associated with PPY988 delivery. Pegcetacoplan exhibited greater potency than FI,  
405 with complete inhibition of the AP amplification loop and C3a generation at predicted  
406 trough level (~59 µg/mL), whilst FI was observed to have minimal effect at levels of  
407 expression associated with PPY988 after 36 weeks. Overall curves generated by  
408 logistic regression revealed an IC50 of 1229 nM for FI, whilst FH [IC50: 6 nM] was  
409 similar in potency to pegcetacoplan [IC50: 2 nM]. The estimated vitreous trough level  
410 of pegcetacoplan was approximately 100-fold greater than that required for complete

411 inhibition of the AP in this assay. On the other hand, FI was observed to have minimal  
412 effect on AP activation at the levels of PPY988 measured in VH after 36 weeks of  
413 treatment.  
414

## 415 Discussion

416 Gene therapy has been suggested as a promising treatment approach for  
417 slowing macular degeneration in GA secondary to AMD. This manuscript describes a  
418 comprehensive examination of the pharmacokinetic / pharmacodynamic properties of  
419 complement biomarkers in the context of the PPY988 GA subretinal gene therapy  
420 program and provides technical considerations for analyzing biomarker data from  
421 treated subjects. Despite the early termination of the clinical development program,  
422 the PPY988 study achieved notable milestones in the field, including the  
423 implementation of subretinal delivery of gene therapy for GA and the use of serial  
424 vitreous sampling. Herein, we present for the first time an analysis of VH complement  
425 biomarkers at baseline and after surgical delivery of a subretinal gene therapy.  
426 Baseline levels were similar to a previous study of VH complement<sup>34</sup> with potentially  
427 confounding loss of total protein also observed in our study, highlighting the need to  
428 analyze data in the context of changing total protein levels post-vitreotomy. Our  
429 observations reveal consistent elevation of VH FI levels over a 96-week period,  
430 accompanied by reduced detection of the FB activation product Ba and ratios of  
431 Ba:FB, consistent with sustained modulation of complement AP activity in the vitreous  
432 humor compartment. These data confirm that AAV gene therapy has a consistent and  
433 lasting effect. Furthermore, although unpowered due to low N, the effects of FI gene  
434 therapy on complement breakdown product biomarker profiles (Ba (**Figure 2A**) and  
435 C3b/iC3b (**Supplementary Figure 3A**) appear to be comparable in both *CFI* RV  
436 positive and negative sub-populations, which is counter to the original hypothesis of a  
437 more dramatic effect in a sub-population with lower baseline FI levels<sup>19,20</sup>. However,  
438 due to small sample size this finding should be interpreted with caution. Although the  
439 impact on C3 breakdown products was minimal at week 36, it became significant at  
440 week 96. Elevation of FI and modulation of the broader complement system was also  
441 observed in Olink proteomic profiling of VH samples (**Supplementary Figure 6**),  
442 supporting the complement biomarker findings in the validated panel. Elevated levels  
443 of FI were detected in both AH and VH. PPY988 efflux from the sub-retinal injection  
444 may have transduced cells in the anterior chamber of the eye resulting in an increase  
445 in AH FI concentration. However, the correlation of other complement biomarkers  
446 between VH and AH was inconsistent, in particular, Ba and C1q exhibited disparate  
447 post-treatment trends (**Figure 4**), indicating that AH alone may not be a reliable  
448 biomarker matrix for assessing the activity of complement biomarkers at the target

449 tissues. This cautionary advice should be considered in context of previous reports,  
450 suggesting AH could be a broadly reliable proxy for VH<sup>35</sup>, albeit that only full length  
451 complement proteins were studied therein. To ensure quality control, protein level  
452 normalization was added to the analysis comparing biomarker levels before and after  
453 vitrectomy. Interestingly, the overall conclusions remained consistent regardless of  
454 protein adjustment, which strengthens confidence in the study's findings. After  
455 determining the futility of the Phase II study (HORIZON, NCT04566445), an *in vitro*  
456 assay using clinically relevant levels of complement proteins was conducted to  
457 investigate a possible biomarker-related explanation. The results showed that  
458 pegcetacoplan had higher potency than FI in reducing C3 convertase activity *in vitro*  
459 suggesting that limited *in-vitro* potency of FI may have contributed to the lack of clinical  
460 success at Phase II. Although the translatability of the VH modelling assay to GA  
461 remains to be demonstrated, FI's lower potency suggests that further increasing FI  
462 concentration on its own by gene therapy may not achieve clinically meaningful levels  
463 of C3 inhibition. It should however be noted that intravitreal pegcetacoplan will be at  
464 its highest concentration in the mid-vitreous whereas FI will most likely be at the  
465 highest level in the subretinal space where it is being produced. Hence directly  
466 comparing vitreous levels of each compound may underestimate the activity of FI  
467 compared with pegcetacoplan at the level of the subretinal space.

468 The lack of efficacy in the PPY988 Phase II study does not detract from the  
469 viability of complement activation as an effective target for intervention in GA, given  
470 the therapeutic effect observed for complement inhibitors pegcetacoplan and  
471 avacincaptad pegol (Izervay; Iveric Bio)<sup>5,6</sup>, and this study's observation that  
472 pegcetacoplan achieves a much greater potency than FI *in vitro*. FI had a  
473 disproportionately larger effect upon Ba compared to C3a and C3b/iC3b, which may be  
474 due to the lability of C3a, differences in diffusion capabilities of the molecules from the  
475 retina, and possible contribution of C3 concentration from the choriocapillaris as well  
476 as biosynthesis by local immune cells. In addition, we hypothesize FI's capacity to  
477 regulate the production of Ba without causing significant changes in the levels of C3b  
478 and C3a in the fluid phase could be contributed to by regulation of AP tickover,  
479 resulting from binding and activation of FB on water-hydrolysed C3 (C3H<sub>2</sub>O.) followed  
480 by release of Ba<sup>10</sup>. Similarly, the intravitreal administration of a neutralizing factor D  
481 Fab, which was found to be ineffective in Phase III trials for GA, was also able to  
482 reduce ocular Ba levels<sup>28</sup>. However, it did not have a significant impact on the



483 generation of VH C3 breakdown products. In this study, by week 96, there was an  
484 observed rise in the levels of full-length C3 and a corresponding decrease in the ratios  
485 of breakdown products to full length. While the specific implications of this change are  
486 uncertain, it potentially suggests a reduction in C3 consumption, which aligns with the  
487 known activity of FI, but this may be confounded with upregulated biosynthesis of C3  
488 given its acute phase nature<sup>36</sup>. C3 breakdown products only partially diffuse due to  
489 cell-surface adherence. Based on this understanding, we hypothesize that changes in  
490 C3 breakdown products may only become detectable when a certain threshold of  
491 modulation in tissue complement activity is reached. Overall, the data suggests that  
492 fully functional FI is being secreted into the VH, but the regulatory effects on the level  
493 of Ba may be representative of convertase formation in the VH and not the macula  
494 retina/RPE nor the choroid. To validate this hypothesis, one approach would be to  
495 conduct vitreal sampling using an effective drug targeting C3 for GA in a larger cohort.  
496 Further investigations are needed to gain a better understanding of these possibilities.

497 The study has several limitations that should be considered when interpreting  
498 the results. Firstly, the study did not include a control group, which means that the  
499 observed changes in complement biomarkers may not be solely attributed to  
500 transgene expression. Other factors, such as the impact of subretinal gene therapy  
501 administration triggering local inflammation or the effects of total vitrectomy on the  
502 protein environment, could also contribute to these changes. During the study, no  
503 significant safety concerns or adverse events were reported aside from dose-  
504 responsive incidents of RPE changes in the area of the subretinal injection. However,  
505 increased levels of antibodies to the vector and transgene were observed following  
506 treatment<sup>37</sup>. It is important to note that these antibody levels were transient and  
507 resolved shortly after treatment, indicating that the observed antibody responses were  
508 not persistent or associated with any significant clinical consequences. It is worth  
509 noting that the subjects included in this early clinical trial had more advanced disease  
510 compared to the typical clinical trial GA population which may impact the  
511 generalizability of the findings to the broader GA population. Additionally, the study had  
512 a relatively small sample size, which increases the risk of bias. Furthermore, the  
513 biomarker conclusions drawn from the study subjects may not be representative of the  
514 subjects treated in the subsequent Phase II study. Therefore, caution should be  
515 exercised when generalizing the findings to larger populations. Despite convincing and  
516 robust genetic links to AMD reported for Type I *CFI* variants<sup>19-22</sup>, this study observed

517 no difference in biomarker response when comparing *CFI* RV carriers to the broad  
518 population. Interestingly, emerging data have revealed more modest ORs for *CFI* RVs  
519 in progression from early to late AMD<sup>23</sup> and macular thinning was observed in UK  
520 Biobank eyes of carriers <60 years old<sup>38</sup>. Moreover, the long-term effects of  
521 complement therapy on the progression of GA are still uncertain. Another limitation to  
522 consider is the translatability of the *in vitro* VH modelling assay to the disease  
523 processes occurring in GA, and the relevance of the assay to cell-surface complement  
524 activation occurring in the area of GA. The LPS-coated surface used for the VH  
525 modelling assay would most likely result in more acute complement activation than in  
526 the GA retina. Finally, this is a relative potency assay and does not take into  
527 consideration the biodistribution of different modalities and routes of administration.  
528 Despite these limitations, the conclusions drawn from this study are compelling and  
529 hold significant implications for other gene therapy programs. The introduction of the  
530 innovative *in vitro* complement activation assay serves as a valuable benchmark for  
531 gene therapy programs.

532 The superior potency of FH compared to FI highlights the importance of  
533 conducting potency comparisons using *in vitro* assays that reflect physiologically  
534 relevant levels of complement proteins to guide decision-making. This finding opens  
535 promising avenues for further investigation, with potential for engineering of more  
536 active RCA protein truncates and chimeras including CR1, MCP, DAF and FH, FHRs.  
537 To advance gene therapy programs, future research should focus on building upon the  
538 pharmacokinetic / pharmacodynamic findings. It is crucial to establish tissue  
539 concentrations and estimates of the target required for complement modulation before  
540 moving into clinical stages. Pre-clinical assays that can be effectively translated to GA  
541 remain elusive. Overall, the role of complement in GA and the potential benefits of a  
542 safe one-time gene therapy in reducing AMD progression suggest the need for further  
543 clinical development of complement gene therapy.

544  
545

546 **Conflict of interest**

547 The authors declare the following competing interests: Drs T Hallam, E  
548 Gardenal, A Jones, S Ellis, E Pekle, K Carney, and L Drage and Ms C Wenden, Ms H  
549 Beadsmoore and Mr T Haye are employees of Gyroscope Therapeutics Limited, a  
550 Novartis company. Drs Poor, McBlane, Kaiser, Lu, Kassem, Cho, Ferraro,  
551 Rangaswamy, Obeidat, Saint-Geniez, and Grosskreutz are employees of Novartis. T  
552 Hallam is an author on a pending patent for factor I trimolecular complex  
553 building/screening of complement changes.

554 Claire L Harris (In previous three years: consultant: Q32 Bio, Biocryst; Grant  
555 funding: Ra Pharmaceuticals). CLH was an employee of Gyroscope Therapeutics  
556 Limited, a Novartis Company.

557 Professor David H Steel (Consultant: Alcon, Gyroscope, BVI, DORC, Eyepoint,  
558 Complement therapeutics, Alimera; Grant funding: Bayer, Alcon, Roche, DORC, BVI,  
559 Boehringer, Gyroscope Therapeutics Ltd).

560 Professor Robert E MacLaren (Consultant: Biogen, AGTC, and Beacon  
561 Therapeutics; Grant funding: Biogen). REM is also a named inventor on the Biogen  
562 BIIIB112 patent licensed by the University of Oxford.

563

564 **Acknowledgements**

565 The authors thank all the subjects who took part in the FOCUS study, and  
566 Gyroscope Therapeutics and Novartis colleagues past and present who made this  
567 possible.

568 The authors thank Michael Wittpoth, Les McGuire, Jayashree Sahni, and Maria  
569 Costa from Novartis for assistance in providing critical comments on the manuscript,  
570 and Shyamtanu Datta for assistance with the *in vitro* modelling.

571

572 **FOCUS principal investigators**

573

574 Dr Claire Bailey

575 *Bristol Eye Hospital*

576 *Bristol, United Kingdom (UK)*

577

578 Professor Sobha Sivaprasad

579 *Moorfields Eye Hospital - NHS Foundation Trust London, UK*

580

581 Professor David Steel

582 *Sunderland Eye Infirmary*

583 *Sunderland, UK*

584

585 Dr Tsveta Ivanova

586 *Manchester Royal Eye Hospital*

587 *Manchester, UK*

588

589 Dr Paulo Stanga

590 *The Retina Clinic London*

591 *London, UK*

592

593 Dr Kamin Xue

594 *Nuffield Laboratory of Ophthalmology University of Oxford & Oxford Eye Hospital,*

595 *Oxford University Hospitals NHS Foundation Trust*

596 *Oxford, UK*

597

598 Dr Peter Charbel Issa

599 *Nuffield Laboratory of Ophthalmology*

600 *University of Oxford & Oxford Eye Hospital, Oxford University Hospitals NHS*

601 *Foundation Trust*

602 *Oxford, UK*

603

604 Dr Jared Neilsen

605 *Wolfe Eye Clinic West Des Moines, Indianapolis, USA*

606

607 Dr Jeff Heier

608 *Ophthalmic Consultants of Boston*

609 *Boston, USA*

610

611 Dr Arshad Khanani

612 *Sierra Eye Associates*

613 *Reno, USA*

614

615 Dr Christopher Riemann

616 *Cincinnati Eye Institute Cincinnati, Ohio, US*

617

618 Dr Alan Ho

619 *Mid-Atlantic Retina, Wills Eye Hospital Philadelphia, Pennsylvania, US*

620

621 Dr Raj Maturi

622 *Midwest Eye Institute Northside*

623 *Indianapolis, US*

624

625 Dr Anthony De Beus

626 *Pepose Vision Institute Chesterfield, Missouri, US*

627

628 Prof. Robert E MacLaren

629 *Nuffield Laboratory of Ophthalmology*

630 *University of Oxford & Oxford Eye Hospital, Oxford University Hospitals NHS*

631 *Foundation Trust*

632

633 Dr Nancy Holekamp

634 *Pepose Vision Institute Chesterfield, Missouri, US*

635

636

637

638

## References

639

640

641

642

643

644

645

646

647

648

649

650

651

652

653

654

655

656

657

658

659

660

661

662

663

664

665

666

667

1. Wong WL, Su X, Li X, et al. Global prevalence of age-related macular degeneration and disease burden projection for 2020 and 2040: A systematic review and meta-analysis. *Lancet Glob Health*. 2014;2(2). doi:10.1016/S2214-109X(13)70145-1
2. Ambati J, Fowler BJ. Mechanisms of age-related macular degeneration. *Neuron*. 2012;75(1):26-39. doi:10.1016/j.neuron.2012.06.018
3. Patnaik JL, Lynch AM, Pecun PE, et al. The impact of advanced age-related macular degeneration on the National Eye Institute's Visual Function Questionnaire-25. *Acta Ophthalmol*. 2021;99(7):750-755. doi:10.1111/aos.14731
4. Patel PJ, Ziemssen F, Ng E, et al. Burden of illness in geographic atrophy: A study of vision-related quality of life and health care resource use. *Clinical Ophthalmology*. 2020;14:15-28. doi:10.2147/OPHTH.S226425
5. Heier JS, Lad EM, Holz FG, et al. Pegcetacoplan for the treatment of geographic atrophy secondary to age-related macular degeneration (OAKS and DERBY): two multicentre, randomised, double-masked, sham-controlled, phase 3 trials. *The Lancet*. 2023;402(10411):1434-1448. doi:10.1016/S0140-6736(23)01520-9
6. Patel SS, Lally DR, Hsu J, et al. Avacincaptad pegol for geographic atrophy secondary to age-related macular degeneration: 18-month findings from the GATHER1 trial. *Eye (Basingstoke)*. 2023;37(17):3551-3557. doi:10.1038/s41433-023-02497-w
7. Tzoumas N, Riding G, Williams MA, Steel DHW. Complement inhibitors for age-related macular degeneration. *Cochrane Database of Systematic Reviews*. 2023;2023(6). doi:10.1002/14651858.CD009300.pub3

- 668 8. Dreismann AK, McClements ME, Barnard AR, et al. Functional  
669 expression of complement factor I following AAV-mediated gene  
670 delivery in the retina of mice and human cells. *Gene Ther.*  
671 2021;28(5):265-276. doi:10.1038/s41434-021-00239-9
- 672 9. Dreismann AK, Hallam TM, Tam LCS, et al. Gene targeting as a  
673 therapeutic avenue in diseases mediated by the complement  
674 alternative pathway. *Immunol Rev.* 2023;313(1):402-419.  
675 doi:10.1111/imr.13149
- 676 10. Nilsson B, Nilsson Ekdahl K. The tick-over theory revisited: Is C3 a  
677 contact-activated protein? *Immunobiology.* 2012;217(11):1106-  
678 1110. doi:<https://doi.org/10.1016/j.imbio.2012.07.008>
- 679 11. Hallam TM, Sharp SJ, Andreadi A, Kavanagh D. Complement factor  
680 I: Regulatory nexus, driver of immunopathology, and therapeutic.  
681 *Immunobiology.* 2023;228(5). doi:10.1016/j.imbio.2023.152410
- 682 12. Pangburn MK, Schreiber RD, Muller-Eberhard HJ. HUMAN  
683 COMPLEMENT C3b INACTIVATOR: ISOLATION,  
684 CHARACTERIZATION, AND DEMONSTRATION OF AN  
685 ABSOLUTE REQUIREMENT FOR THE SERUM PROTEIN fIIH  
686 FOR CLEAVAGE OF C3b AND C4b IN SOLUTION\*. *J Exp Med.*  
687 1977;146:257-270.
- 688 13. Medof ME, Iida K, Mold C, Nussenzweig V. UNIQUE ROLE OF THE  
689 COMPLEMENT RECEPTOR CR1 IN THE DEGRADATION OF C3b  
690 ASSOCIATED WITH IMMUNE COMPLEXES\*. *J Exp Med.*  
691 1982;156:1739-1754.
- 692 14. Whaley K, Ruddy S. Modulation of C3b Hemolytic Activity by a  
693 Plasma Protein Distinct from C3b Inactivator. *Science (1979).*  
694 1976;193(4257):1011-1013. doi:10.1126/science.948757
- 695 15. Shiraishi S, Stroud RM. Cleavage products of C4b produced by  
696 enzymes in human serum. *Immunochemistry.* 1975;12(12):935-  
697 939. doi:[https://doi.org/10.1016/0019-2791\(75\)90256-6](https://doi.org/10.1016/0019-2791(75)90256-6)
- 698 16. Liszewski MK, Post TW, Atkinson JP. Membrane Cofactor Protein  
699 (MCP or CD46): Newest Member of the Regulators of Complement  
700 Activation Gene Cluster. *Annu Rev Immunol.* 1991;9(1):431-455.  
701 doi:10.1146/annurev.iy.09.040191.002243

- 702 17. Nagasawa S, Stroud RM. Mechanism of action of the C3b  
703 inactivator: Requirement for a high molecular weight cofactor (C3b-  
704 C4bINA cofactor) and production of a new C3b derivative (C3b').  
705 *Immunochemistry*. 1977;14(11):749-756.  
706 doi:[https://doi.org/10.1016/0019-2791\(77\)90345-7](https://doi.org/10.1016/0019-2791(77)90345-7)
- 707 18. Lachmann PJ, Halbwachs L. *THE INFLUENCE OF C3b*  
708 *INACTIVATOR (KAF) CONCENTRATION ON THE ABILITY OF*  
709 *SERUM TO SUPPORT COMPLEMENT ACTIVATION*. Vol 21.;  
710 1975.
- 711 19. Kavanagh D, Yu Y, Schramm EC, et al. Rare genetic variants in the  
712 CFI gene are associated with advanced age-related macular  
713 degeneration and commonly result in reduced serum factor I levels.  
714 *Hum Mol Genet*. 2015;24(13):3861-3870. doi:10.1093/hmg/ddv091
- 715 20. Hallam TM, Marchbank KJ, Harris CL, et al. Rare genetic variants  
716 in complement factor i lead to low FI plasma levels resulting in  
717 increased risk of age-related macular degeneration. *Invest*  
718 *Ophthalmol Vis Sci*. 2020;61(6). doi:10.1167/IIOVS.61.6.18
- 719 21. Jones A V., MacGregor S, Han X, et al. Evaluating a Causal  
720 Relationship between Complement Factor I Protein Level and  
721 Advanced Age-Related Macular Degeneration Using Mendelian  
722 Randomization. *Ophthalmology Science*. 2022;2(2).  
723 doi:10.1016/j.xops.2022.100146
- 724 22. Jones A V, Curtiss D, Harris C, et al. An assessment of prevalence  
725 of Type 1 CFI rare variants in European AMD, and why lack of  
726 broader genetic data hinders development of new treatments and  
727 healthcare access. *PLoS One*. 2022;17(9):e0272260-.  
728 <https://doi.org/10.1371/journal.pone.0272260>
- 729 23. Seddon JM, Rosner B, De D, Huan T, Java A, Atkinson J. Rare  
730 Dysfunctional Complement Factor I Genetic Variants and  
731 Progression to Advanced Age-Related Macular Degeneration.  
732 *Ophthalmology Science*. 2023;3(2):100265.  
733 doi:<https://doi.org/10.1016/j.xops.2022.100265>
- 734 24. Java A, Baci P, Widjajahakim R, et al. Functional Analysis of Rare  
735 Genetic Variants in Complement Factor I ( CFI ) using a Serum-



- 736 Based Assay in Advanced Age-related Macular Degeneration .  
737 *Transl Vis Sci Technol.* 2020;9(9):37. doi:10.1167/tvst.9.9.37
- 738 25. Hallam TM, Cox TE, Smith-Jackson K, et al. A novel method for real-  
739 time analysis of the complement C3b:FH:FI complex reveals  
740 dominant negative CFI variants in age-related macular  
741 degeneration. *Front Immunol.* 2022;13.  
742 doi:10.3389/fimmu.2022.1028760
- 743 26. Lachmann PJ, Lay E, Seilly DJ, Buchberger A, Schwaeble W,  
744 Khadake J. Further studies of the down-regulation by Factor I of the  
745 C3b feedback cycle using endotoxin as a soluble activator and red  
746 cells as a source of CR1 on sera of different complotype. *Clin Exp*  
747 *Immunol.* 2016;183(1):150—156. doi:10.1111/cei.12714
- 748 27. Pruiomboom-Brees IM, Gupta S, Chemuturi N, et al. International  
749 consortium for innovation and quality: An industry perspective on  
750 the nonclinical and early clinical development of intravitreal drugs.  
751 *Clin Transl Sci.* 2023;16(5):723-741. doi:10.1111/cts.13480
- 752 28. Edmonds R, Steffen V, Honigberg LA, Chang MC. Alternative  
753 Complement Pathway Inhibition by Lampalizumab: Analysis of Data  
754 From Chroma and Spectri Phase III Clinical Trials. *Ophthalmology*  
755 *Science.* 2023;3(3). doi:10.1016/j.xops.2023.100286
- 756 29. Nürnbergger W, Bhakdi S. Plasma C3d/C3 quotient as a parameter  
757 for in vivo complement activation. *J Immunol Methods.*  
758 1984;74(1):87-91. doi:https://doi.org/10.1016/0022-  
759 1759(84)90370-3
- 760 30. Kim AHJ, Strand V, Sen DP, et al. Association of Blood  
761 Concentrations of Complement Split Product iC3b and Serum C3  
762 With Systemic Lupus Erythematosus Disease Activity. *Arthritis and*  
763 *Rheumatology.* 2019;71(3):420-430. doi:10.1002/art.40747
- 764 31. Lynch NJ, Willis CL, Nolan CC, et al. Microglial activation and  
765 increased synthesis of complement component C1q precedes  
766 blood-brain barrier dysfunction in rats. *Mol Immunol.*  
767 2004;40(10):709-716. doi:10.1016/j.molimm.2003.08.009
- 768 32. Machacek M, Deschatelets P, Kim R, Johnson P, Grossi F.  
769 Prediction of duration of C3 inhibition with APL-2 in human eyes

- 770 using a PK/PD binding model. *Invest Ophthalmol Vis Sci.*  
771 2017;58:1971.  
772 <https://iovs.arvojournals.org/article.aspx?articleid=2637839&result>  
773 Click=1
- 774 33. Reid MJ. Ocular Distribution of Pegcetacoplan in Rabbits Following  
775 a Single Intravitreal Injection. *Invest Ophthalmol Vis Sci.* 2021;62.  
776 <https://iovs.arvojournals.org/article.aspx?articleid=2775957&result>  
777 Click=1
- 778 34. Mandava N, Tirado-Gonzalez V, Geiger MD, et al. Complement  
779 activation in the vitreous of patients with proliferative diabetic  
780 retinopathy. *Invest Ophthalmol Vis Sci.* 2020;61(11).  
781 doi:10.1167/IOVS.61.11.39
- 782 35. Wilson S, Siebourg-Polster J, Titz B, et al. Correlation of Aqueous,  
783 Vitreous, and Serum Protein Levels in Patients With Retinal  
784 Diseases. *Transl Vis Sci Technol.* 2023;12(11).  
785 doi:10.1167/tvst.12.11.9
- 786 36. Ricklin D, Reis ES, Mastellos DC, Gros P, Lambris JD. Complement  
787 component C3 – The “Swiss Army Knife” of innate immunity and  
788 host defense. *Immunol Rev.* 2016;274(1):33-58.  
789 doi:10.1111/imr.12500
- 790 37. Nielsen J, MacLaren RE, Heier JS, et al. Preliminary Results from a  
791 First-in-human Phase I/II Gene Therapy Study (FOCUS) of  
792 Subretinally Delivered GT005, an Investigational AAV2 Vector, in  
793 Patients with Geographic Atrophy Secondary to Age-related  
794 Macular Degeneration. *Invest Ophthalmol Vis Sci.* 2022;63(7):1504.
- 795 38. Tzoumas N, Kavanagh D, Cordell HJ, Lotery AJ, Patel PJ, Steel DH.  
796 Rare complement factor i variants associated with reduced macular  
797 thickness and age-related macular degeneration in the UK Biobank.  
798 *Hum Mol Genet.* 2022;31(16):2678-2692.  
799 doi:10.1093/hmg/ddac060

800  
801

802 **Figure Legends**

803

804 **Figure 1.** Surgical delivery of PPY988 AAV2-*CFI*. (A) PPY988 vector design. FI protein  
805 is secreted by cells targeted by AAV2 serotype and containing the cDNA sequence for  
806 wild-type *CFI* (NM\_000204.4) driven by a CAG promoter<sup>8</sup>. (B) Subretinal delivery of  
807 PPY988. (C) Vitrectomy during SR delivery of PPY988 results in loss of total protein  
808 (TP) in the vitreous humor. TP concentration (y-axis, log<sub>2</sub> µg/µL) was measured at  
809 baseline and 5 or 12, 36, and 96 weeks post-surgery (y-axis). Mean +/- SE is shown  
810 by blue bars and lines whilst all subjects are shown by black lines for both vitreous  
811 (left) and aqueous (right) humor. A significant reduction in TP was observed at week  
812 96 in vitreous humor (\*P=0.033). Significance is defined as \*P<0.05. BL = Baseline;  
813 WK= week.

814

815

816 **Figure 2.** Temporal expression of factor I (FI) in vitreous humor (VH) and aqueous  
817 humor (AH) after PPY988 delivery. (A,B) FI levels (y-axis, ng/mL) in VH were  
818 significantly increased at week 36 and 96 post-surgery (x-axis) both when non-  
819 normalised (A) (P=0.001 for both timepoints) and total protein -normalised (B)  
820 (P=0.002 at both timepoints). Mean +/- SE is shown by bars for all (black lines) broad  
821 (blue lines) and CFI RV (green lines) groups. (C,D) FI level (y-axis, ng/mL) for each  
822 subject in the cohort is tracked by week (x-axis) and separated by dose (2E10 vg:  
823 orange lines; 5E10 vg: green lines; 2E11 vg: blue lines) in VH (C) and AH (with  
824 significant increase in AH FI at week 36 and 96 (both P<0.001)) (D), where mean +/-  
825 SE shown by black bars. Significance is defined as \*P<0.05; \*\*P<0.01, \*\*\*P<0.001. N  
826 numbers are shown above X-axis. BL = Baseline; WK= week.

827

828

829 **Figure 3.** Modulation of Ba and Ba:FB by PPY988 delivery. (A,B) Ba concentrations  
830 (Y-axis, ng/mL) in vitreous humor (VH) samples by week post-surgery (X-axis). Mean  
831 +/- SE is shown by bars for all (black lines) broad (blue lines) and CFI RV (green lines)  
832 groups. Significant reductions in Ba were observed at week 36 for both non-  
833 normalised (P=0.004) (A) and total protein (TP) normalised (P=002) (B) data and week  
834 96 for non-normalised data (P=0.003) and TP normalised (P=038). (C,D) Ratios of  
835 Ba:FB concentration (y-axis, ng/mL) were calculated for each subject at each sampling

836 post-surgery week (x-axis). Mean +/- SE is shown by bars for all (black lines) broad  
837 (blue lines) and *CFI* RV (green lines) groups. Significant reductions were identified at  
838 week 36 for both non-normalised ( $P < 0.001$ ) (C) and TP normalised ( $P < 0.001$ ) (D)  
839 Ba:FB ratios, with a reduction at week 96 for non-normalized ( $P = 0.001$ ) and TP  
840 normalized ( $P = 0.033$ ) ratios. Significance is defined as \* $P < 0.05$ ; \*\* $P < 0.01$ ,  
841 \*\*\* $P < 0.001$ . N numbers are shown above X-axis. BL = Baseline; WK= week.

842  
843

844 **Figure 4.** Modulation of complement AP and CP biomarkers by PPY988 delivery. Fold-  
845 changes (y-axis) in complement biomarker [FI, C3, FH, FB, C1q, Ba, C3a, C3b/iC3b,  
846 C4b, Ba:FB, C3a:C3, C3b/iC3b:C3] concentrations from baseline at each post-surgery  
847 week (VH: week 5/12, 36 and 96; AH: week 36 and 96; X-axis) are shown in VH with  
848 no normalisation (A), VH with total protein normalisation (B), and AH with no  
849 normalisation. Mean is shown by thick black lines, +/- SE is shown by bars. Individual  
850 subject changes are shown by grey lines. Yellow boxes highlight disparate trends in  
851 VH vs AH biomarkers. BL = Baseline; WK= week.

852  
853

854 **Figure 5.** *In vitro* modelling of vitreous humor complement activation inhibition by FI  
855 vs pegcetacoplan and additional complement regulators. FI (orange), FH (purple), and  
856 pegcetacoplan (blue) were titrated (x-axis, ng/mL) through artificial vitreous  
857 complement matrix on LPS-coated Weislab™ plates and C3a generation was  
858 measured by ELISA (y-axis, ng/mL). C3a is a marker of convertase activity in the  
859 complement activation cascade, the potency of complement inhibitors or regulators is  
860 reflected in lower amount of C3a generated in the assay when testing comparable  
861 concentrations. Mean is shown with +/-SD represented by bars and 4-parameter fit  
862 logistic regression curves are shown by lines. The 1<sup>st</sup>-3<sup>rd</sup> quartile of increased FI  
863 expression from baseline after 36 weeks of PPY988 delivery is shown by orange area.  
864 The calculated trough concentration of pegcetacoplan in eyes 27 days after IVT  
865 injection is shown by the blue vertical line.

866  
867

Figure 1

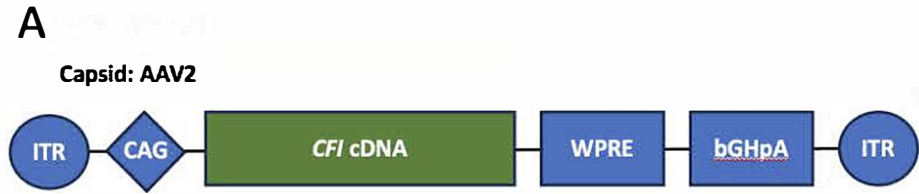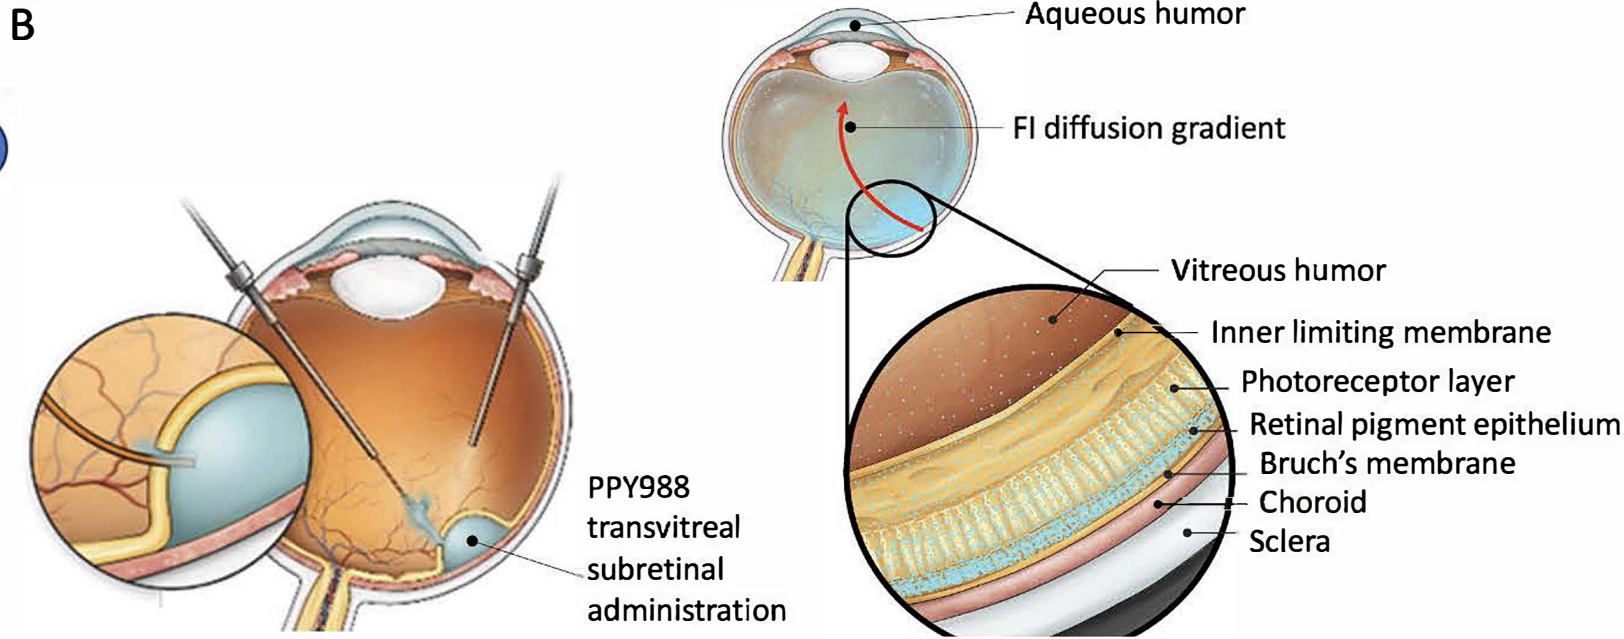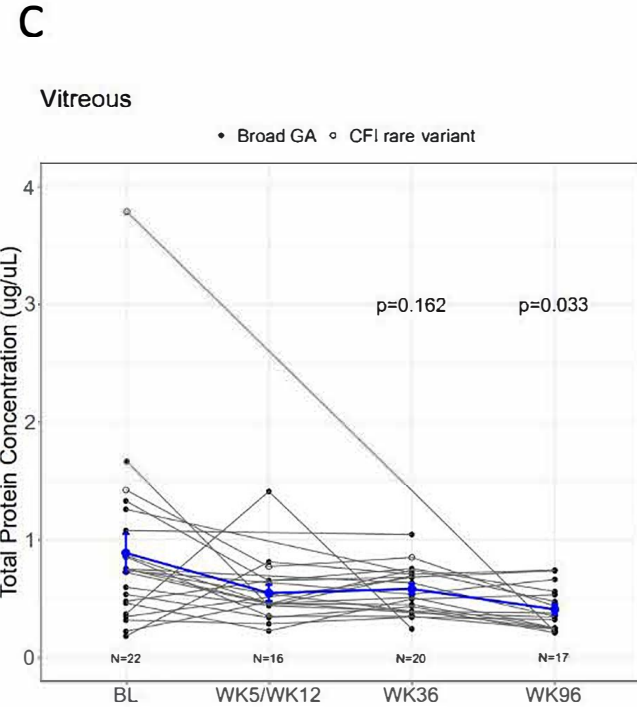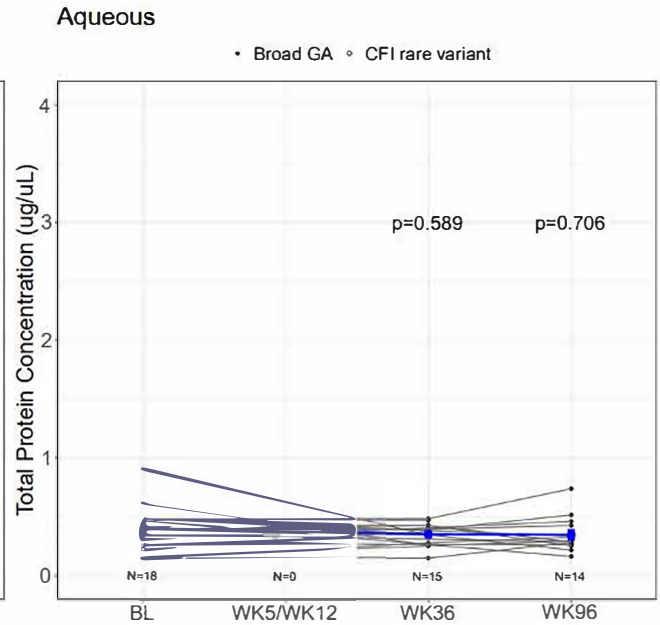

Figure 2

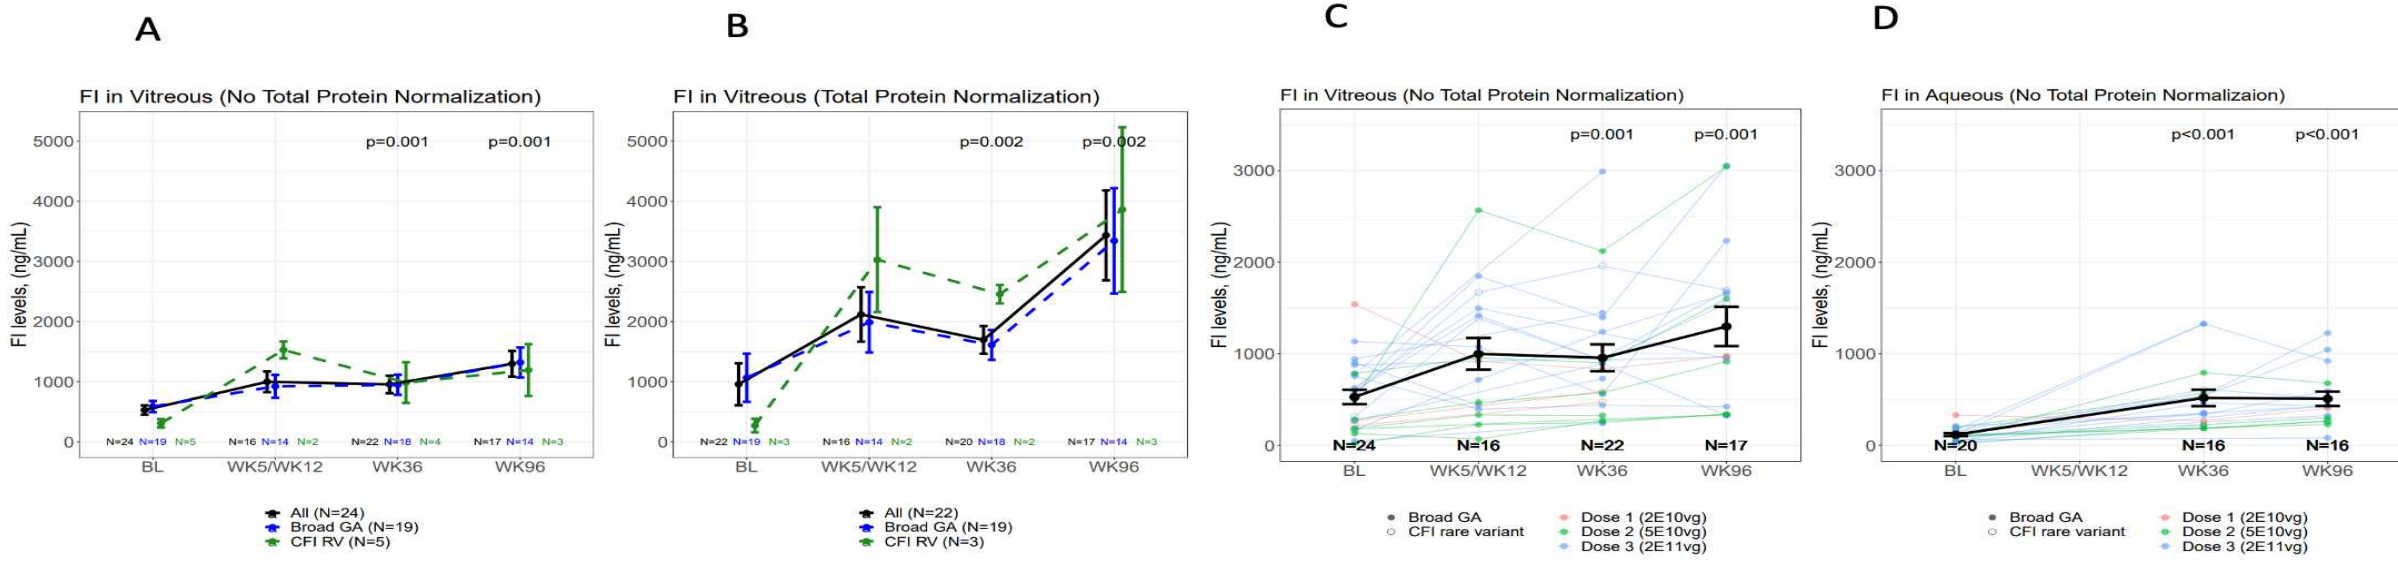

Figure 3

**A**

Ba in Vitreous (No Total Protein Normalization)

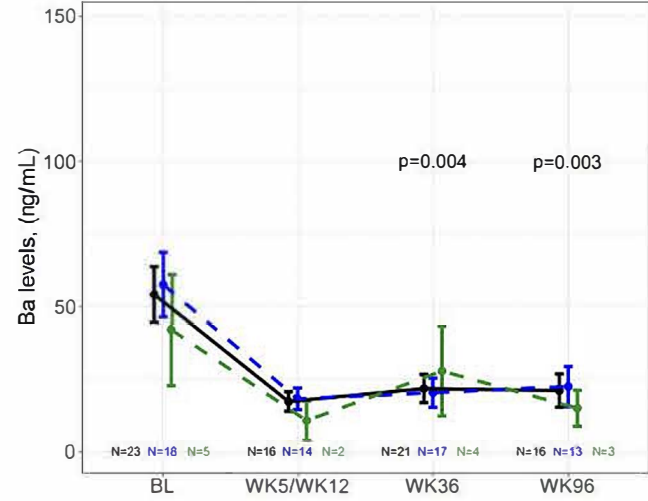

- All (N=23)
- Broad GA (N=18)
- CFI RV (N=5)

**B**

Ba in Vitreous (Total Protein Normalization)

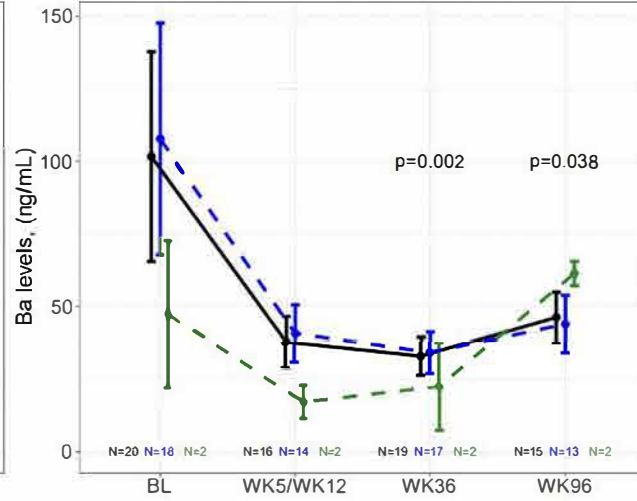

- All (N=20)
- Broad GA (N=18)
- CFI RV (N=2)

**C**

Ba:FB in Vitreous (No Total Protein Normalization)

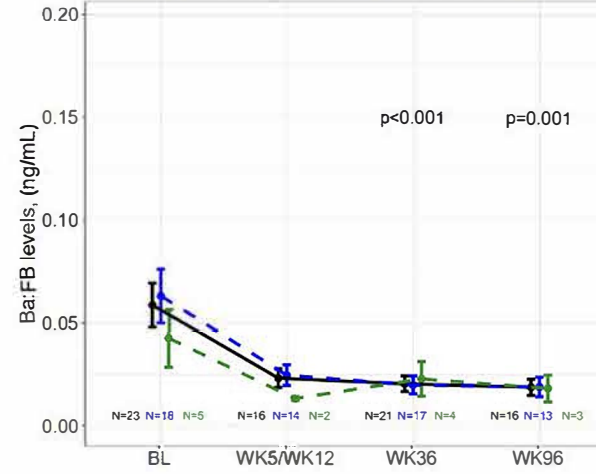

- All (N=23)
- Broad GA (N=18)
- CFI RV (N=5)

**D**

Ba:FB in Vitreous (Total Protein Normalization)

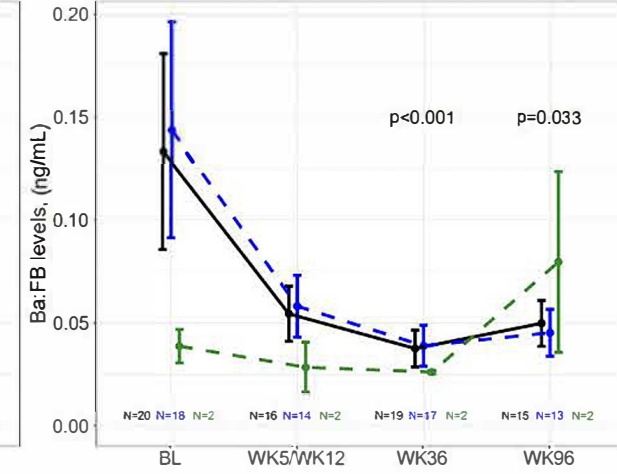

- All (N=20)
- Broad GA (N=18)
- CFI RV (N=2)

Figure 4

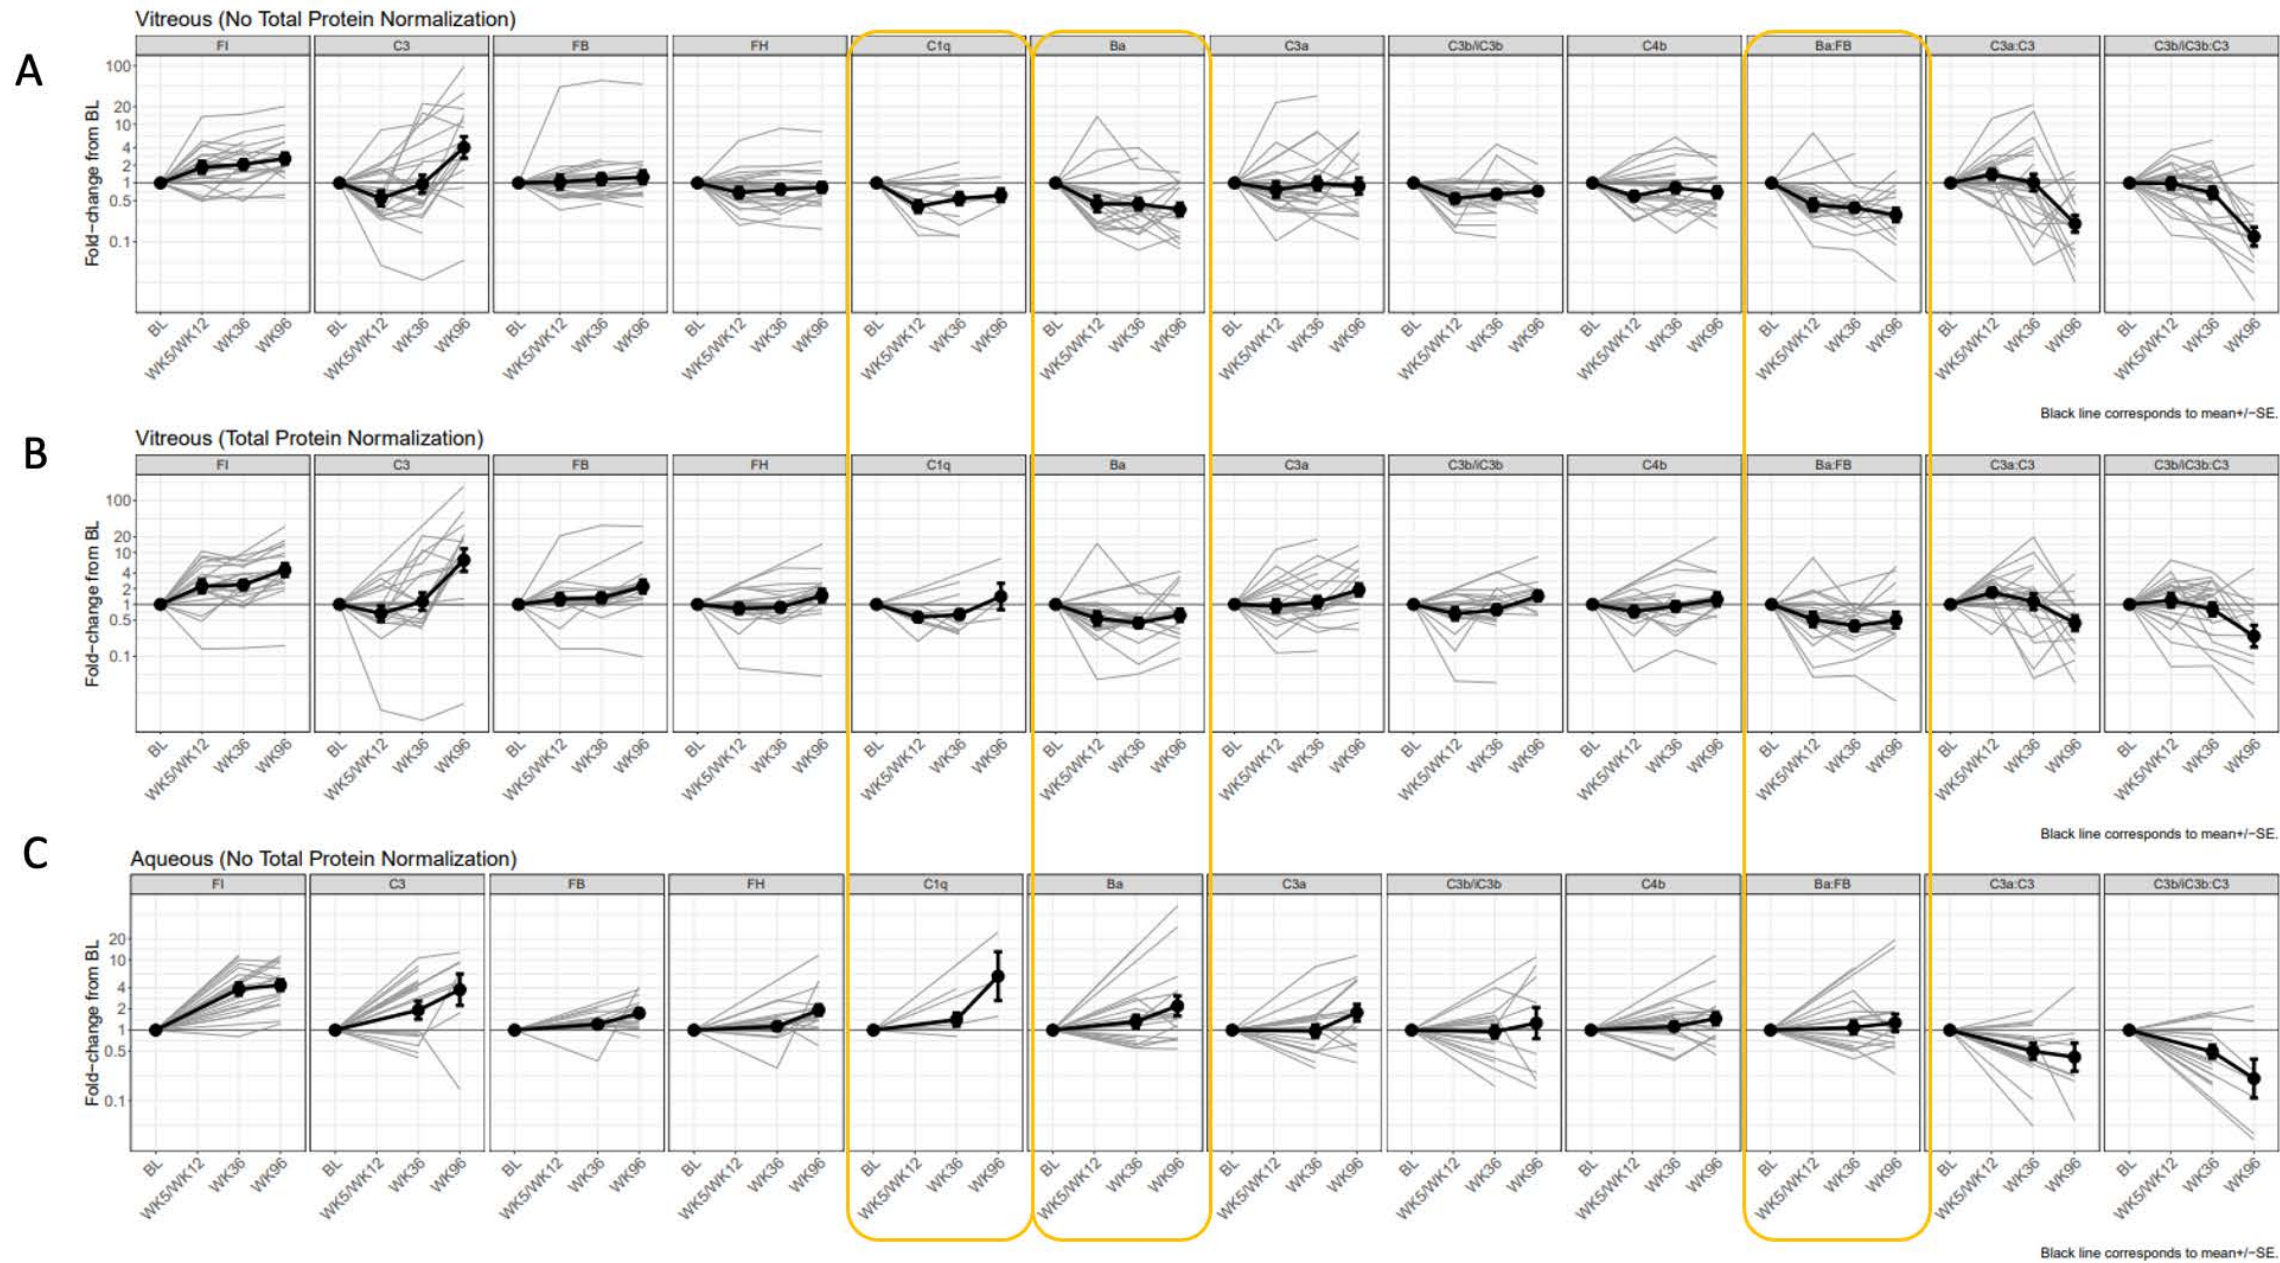



Figure 5

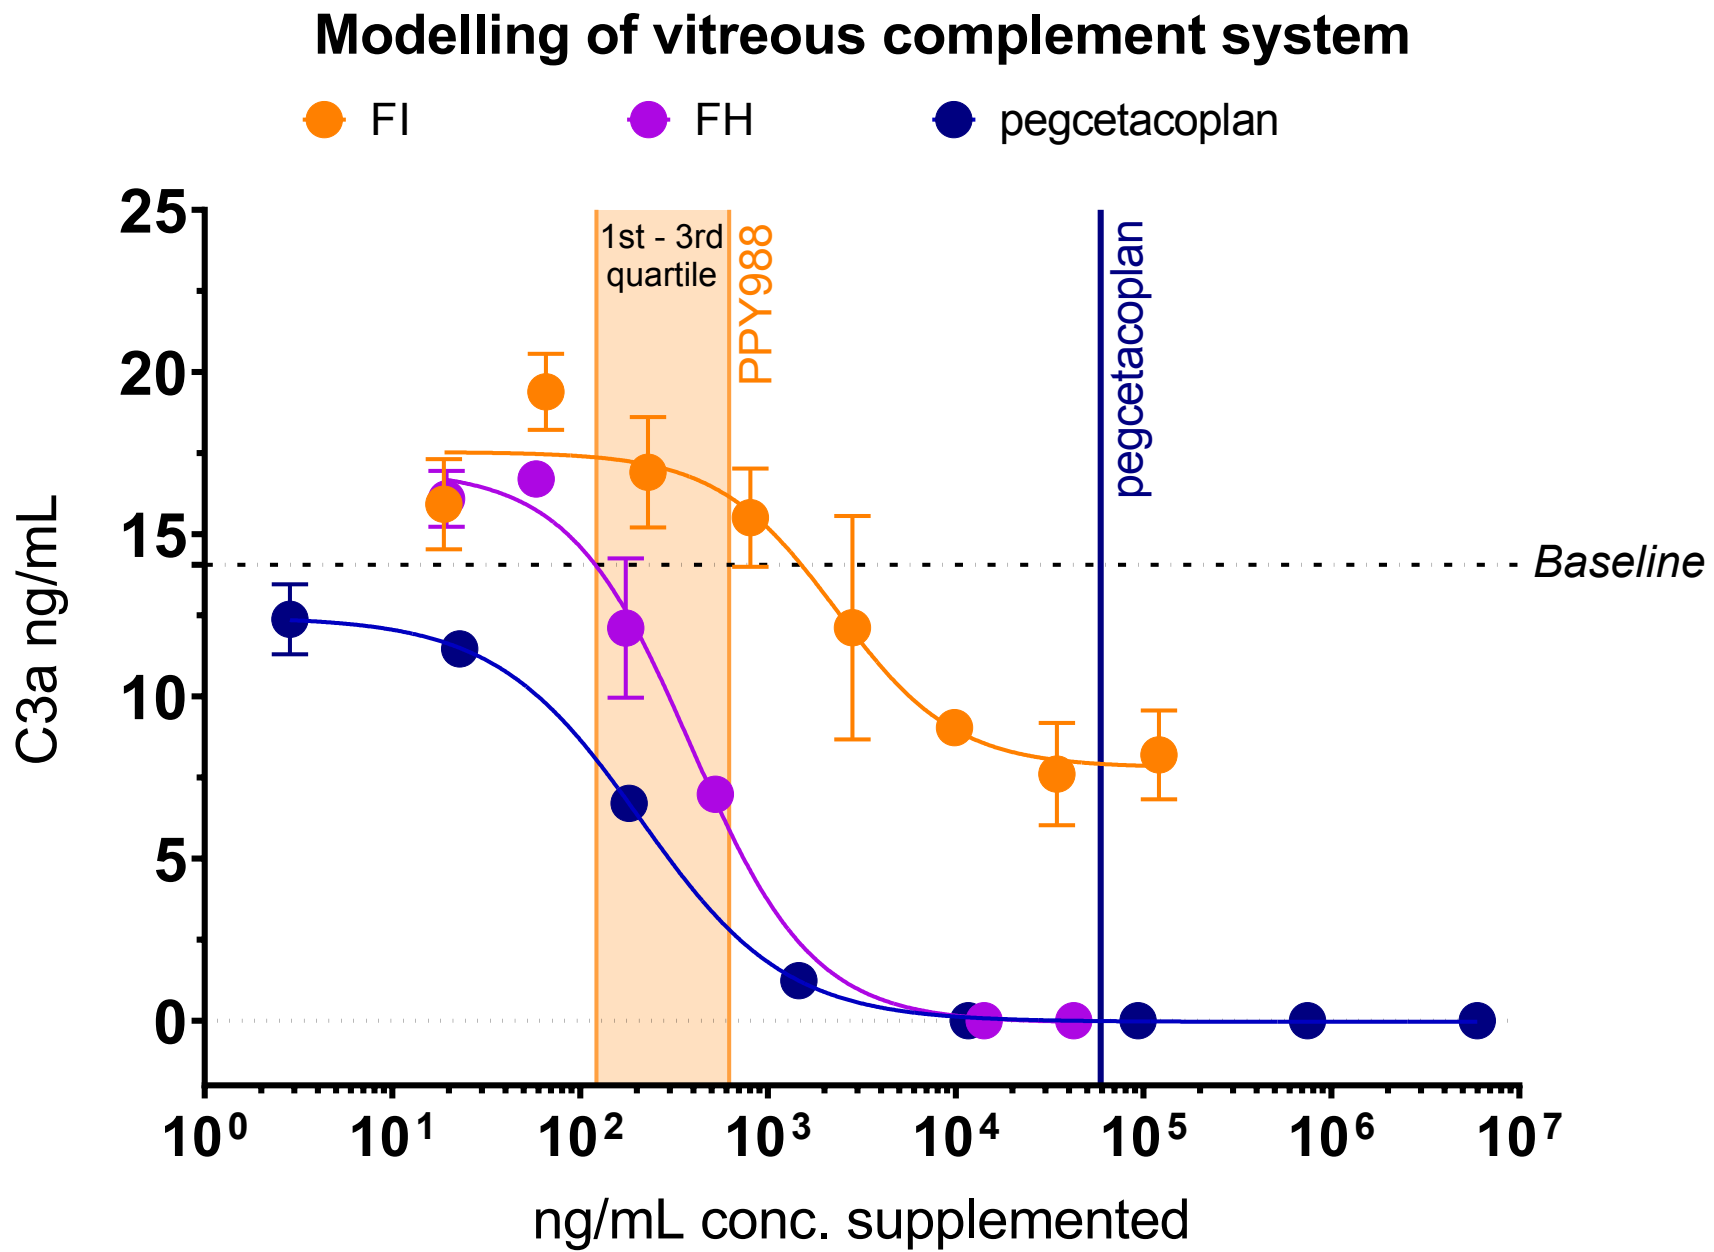

## 1 **Supplementary Methods**

2

### 3 **Study design**

4 FOCUS was conducted at 13 sites over two countries and was sponsored by  
5 Gyroscope Therapeutics, a Novartis company. Key inclusion criteria included a clinical  
6 diagnosis of GA secondary to AMD in the study eye as determined by a retinal  
7 specialist, and a diagnosis of AMD in the contralateral eye (except if subject was  
8 monocular). Study eye GA lesion(s) total size was  $\geq 1.25\text{mm}^2$  and  $\leq 17.5\text{mm}^2$  (cohort 1  
9 to 6) or  $\geq 1.25\text{mm}^2$  (cohort 7), and GA lesions resided completely within the fundus  
10 autofluorescence (FAF) fundus image. Key exclusion criteria included presence of the  
11 following in the study eye; CNV, non-proliferative diabetic retinopathy, glaucomatous  
12 optic neuropathy, or cataract. Subjects were also excluded if they had an active  
13 malignancy or a history of vitrectomy, sub-macular surgery, macular photocoagulation  
14 or previously receiving a gene or cell therapy in the study eye.

15 As outlined in **Supplementary Table 1**, the study had four parts, part 1 (cohorts  
16 1-3); dose escalation, Part 2 (cohort 4); dose expansion, Part 3 (cohorts 5-6); dose  
17 escalation with the Orbit Sub-retinal Delivery System (SDS), and Part 4 (cohort 7);  
18 dose-expansion with the Orbit SDS.

19 PPY988 gene therapy aimed to transduce RPE and PR cells, considered a key  
20 site for AMD pathology and FI production. Parts 1 and 2 (cohorts 1-4) delivered  
21 PPY988 via standard transvitreal subretinal injection (TVSI), previously used for  
22 subretinal gene therapy delivery<sup>1,2</sup>. The surgeon then performed the TVSI procedure  
23 involving a standard 3-port pars plana vitrectomy. The retina was partially detached  
24 through a cannula using buffered salt solution for bleb formation, and a fixed volume  
25 of 0.1mL containing the gene therapy dose was injected into the bleb, which was  
26 expected to flatten after 24 hours.

27 Subjects in Parts 3 and 5 (cohorts 5-7) received PPY988 subretinally via  
28 suprachoroidal cannulation using Orbit SDS, a 510(k) cleared device in the US  
29 (K200325, 14-Jul-2020, US FDA), developed to improve the safety profile of subretinal  
30 injections as compared with TVSI<sup>3</sup>. However, because VH samples were not collected  
31 in Parts 3 to 5, analysis of biomarker data from subjects treated in these cohorts is not  
32 discussed herein.

33 VH, AH and plasma samples were collected from cohort 1 to 4 subjects at BL  
34 prior to surgery, at weeks 12, 36 and 96 after dosing, except for sample collection at

35 week 5 (not week 12) in cohorts 1 and 2, and AH (not VH) was collected for cohort 4  
36 at Week 12.

37 Approximately 25 to 100 $\mu$ L of AH and VH samples were collected under  
38 microscopic visualization. AH samples were collected using a 30G needle attached to  
39 a 1mL syringe. The 30G needle was entered into the anterior chamber through the  
40 temporal limbus using a clear corneal approach. VH samples were collected at BL  
41 using a non-primed 23G vitrectomy probe connected to a 1mL syringe, and post-BL  
42 using a 30G needle through the *pars plana*. Immediately following collection VH and  
43 AH samples were transferred to a sterile collection vial and frozen at  $-80^{\circ}\text{C}$  within 30  
44 minutes.

45 All subjects were assessed for the occurrence of adverse events (AEs) at each  
46 follow-up visit and underwent functional visual and retinal imaging/anatomical  
47 assessments and biological sampling for safety and immunogenicity monitoring at  
48 periodic timepoints up to week 48, considered the primary endpoint timepoint of the  
49 study.

50 It was intended that subjects would be invited to consent to an additional long-  
51 term follow-up assessment until week 240 (5 years). At the time of Phase II study  
52 termination, FOCUS was fully enrolled. As a consequence of the early termination of  
53 the Phase II study, all ocular sampling in FOCUS from that point onward was  
54 terminated, and subjects who had not completed the study assessment window to  
55 week 48 were transferred onto a safety monitoring regimen.

56  
57

## 58 **Olink proteomics**

59 VH samples from 17 subjects were analyzed using the OLINK<sup>®</sup> Target 96  
60 platform (OLINK<sup>®</sup> Proteomics, Uppsala, Sweden) to identify broader pathway changes  
61 affected by subretinal delivery of PPY988. A single measurement was performed for  
62 each sample. The following 4 panels were assessed by Olink: inflammation and  
63 inflammation II, cardiometabolic and neurology. Protein levels were measured on a  
64 relative scale and presented as the normalized protein expression (NPX), which is an  
65 arbitrary unit on a log<sub>2</sub> scale. . Principal component analysis was performed to detect  
66 outlier samples. Olink provides a limit of detection (LOD) for each protein based on  
67 the background noise generated in negative controls (buffer run as a normal sample).  
68 Nonetheless, the Olink protein expression data reported NPX values even for

69 measurements below the LOD. Low abundance proteins were excluded from the  
70 statistical analyses. To identify the proteins changing over time relative to BL, a linear  
71 mixed effect model was used. The model included the following covariates: timepoint,  
72 subject age and sex, sample total protein content and *CFI* RV status (subject ID as  
73 random effect). All analyses were carried out using R version 4.2.3. Nominal p-values  
74 were adjusted using false discovery rate.

75  
76

### 77 ***In vitro* FI potency comparability assay**

78 HEK293 adherent cells with the *CFI* and *CFH* genes knocked out by CRISPR-  
79 Cas9 were transduced with PPY988 (AAV2-*CFI*) vector material produced under good  
80 manufacturing practice (GMP) at 10 different MOIs. After a 24-hour incubation (37°C  
81 at 5% CO<sub>2</sub>) with the vector, the media was replaced and left for a further 48 hours.  
82 Supernatants were collected and stored at -20°C. Supernatants were thawed,  
83 centrifuged (5000xG for 15 mins) then mixed with a fixed volume of human purified  
84 C3b and FH (A114 and A137, Comptech) and incubated for 10 minutes at 37°C. The  
85 mixture was then reduced and labelled by incubating for 5 minutes at 90°C with a  
86 mixture of DTT, SDS buffer and the LIF dye Chromeo P503 (30693, Sigma). A standard  
87 curve of Purified FI (Comptech, Tyler, TX) was made starting at a final concentration  
88 of 4000 ng/mL down to 11 ng/mL. This was diluted in non-transduced control sample  
89 media to ensure the same background matrix for both transduction supernatants  
90 samples and Purified FI standard curve samples. Proteins were separated by CE-SDS  
91 using LIF detection and an adapted version of a published method<sup>4</sup>. The areas of the  
92 peak corresponding 114 kDa alpha prime subunit (normalised to the 75 kDa beta  
93 subunit) are collected for both the Reference (Comptech Purified FI) and the Test  
94 sample (AAV2-*CFI* GMP). The depletion of the peak of interest is plotted using QuBAS  
95 3.0 Statistical Software (Quantics Biostatistics) which performs a parallel line  
96 comparison of the Test compared to the reference and produces a Relative Potency  
97 value corresponding to this analysis. Outliers are statistically identified by a Grubbs  
98 Test and removed automatically from the analysis prior to calculating the Relative  
99 Potency.

100  
101

102 **Supplementary References**

103

104 1. Xue K, Groppe M, Salvetti AP, MacLaren RE. Technique of retinal gene therapy:  
105 delivery of viral vector into the subretinal space. *Eye*. 2017;31(9):1308-1316.  
106 doi:10.1038/eye.2017.158

107 2. MacLaren RE, Groppe M, Barnard AR, et al. Retinal gene therapy in patients  
108 with choroideremia: initial findings from a phase 1/2 clinical trial. *The Lancet*.  
109 2014;383(9923):1129-1137. doi:[https://doi.org/10.1016/S0140-6736\(13\)62117-](https://doi.org/10.1016/S0140-6736(13)62117-0)  
110 0

111 3. Chang S. LXII Edward Jackson Lecture: Open Angle Glaucoma After Vitrectomy.  
112 *Am J Ophthalmol*. 2006;141(6). doi:10.1016/j.ajo.2006.02.014

113 4. Santos M. *Sensitive AAV Capsid Protein Impurity Analysis by CE Using Easy to*  
114 *Label Fluorescent Chromeo Dye P503.*; 2019.

115

# S Figure 1. VH Complement Biomarker pairwise correlation analysis

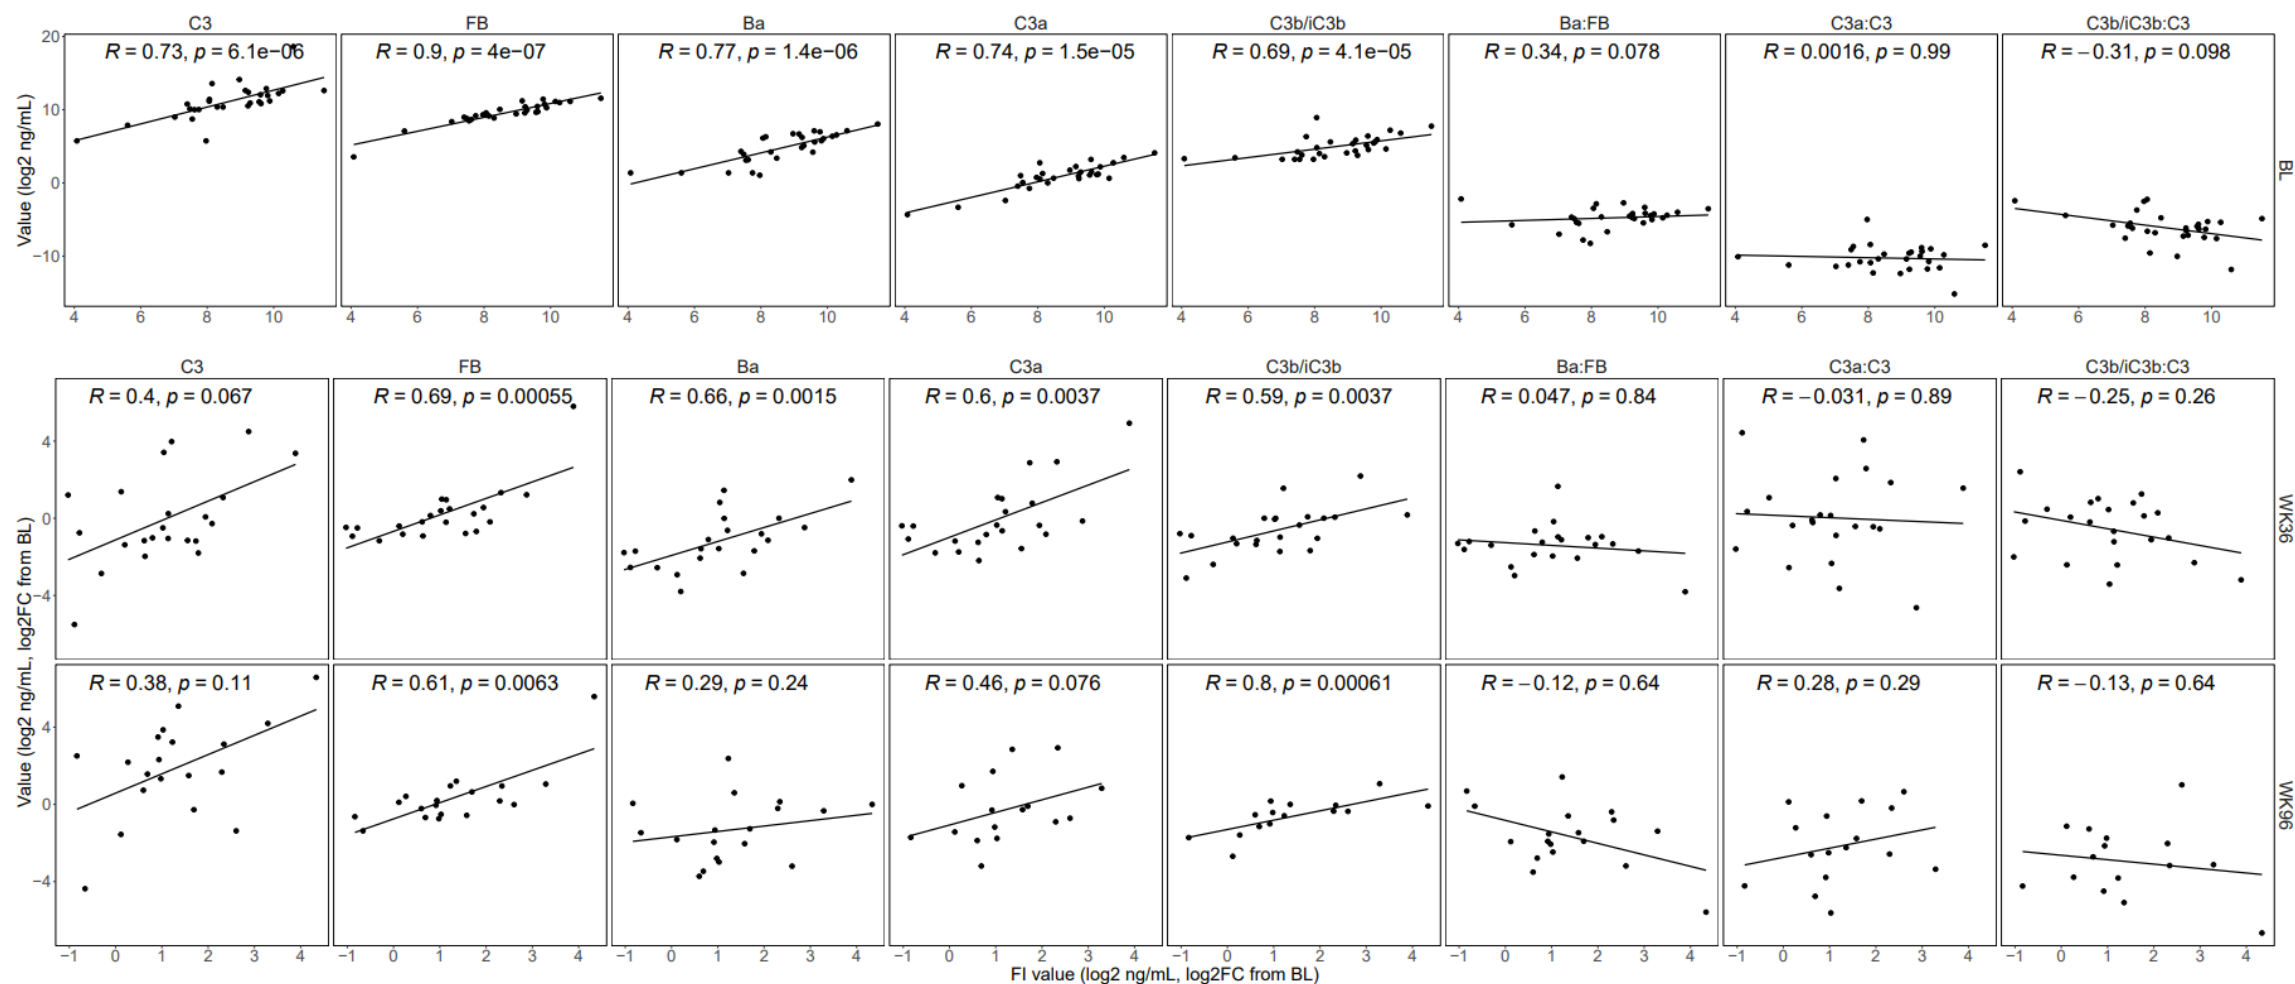

**Supplementary Figure 1.** VH complement biomarker pairwise correlation analysis. Pairwise correlation analysis of FI with intact complement proteins and breakdown products and ratios in the vitreous at baseline, week 36 and week 96 from subjects in cohorts 1 to 4. FI concentrations are shown by the x-axis while biomarker concentrations and ratios are shown by the y-axis. Correlations at BL are determined using log<sub>2</sub> ng/mL concentrations, correlations at weeks 36 and 96 are determined using log<sub>2</sub> fold change from BL. BL = Baseline; WK = week; FC = Fold Change; R = Spearman Correlation Coefficient; p = p-value.

## S Figure 2. AH Complement Biomarker pairwise correlation analysis

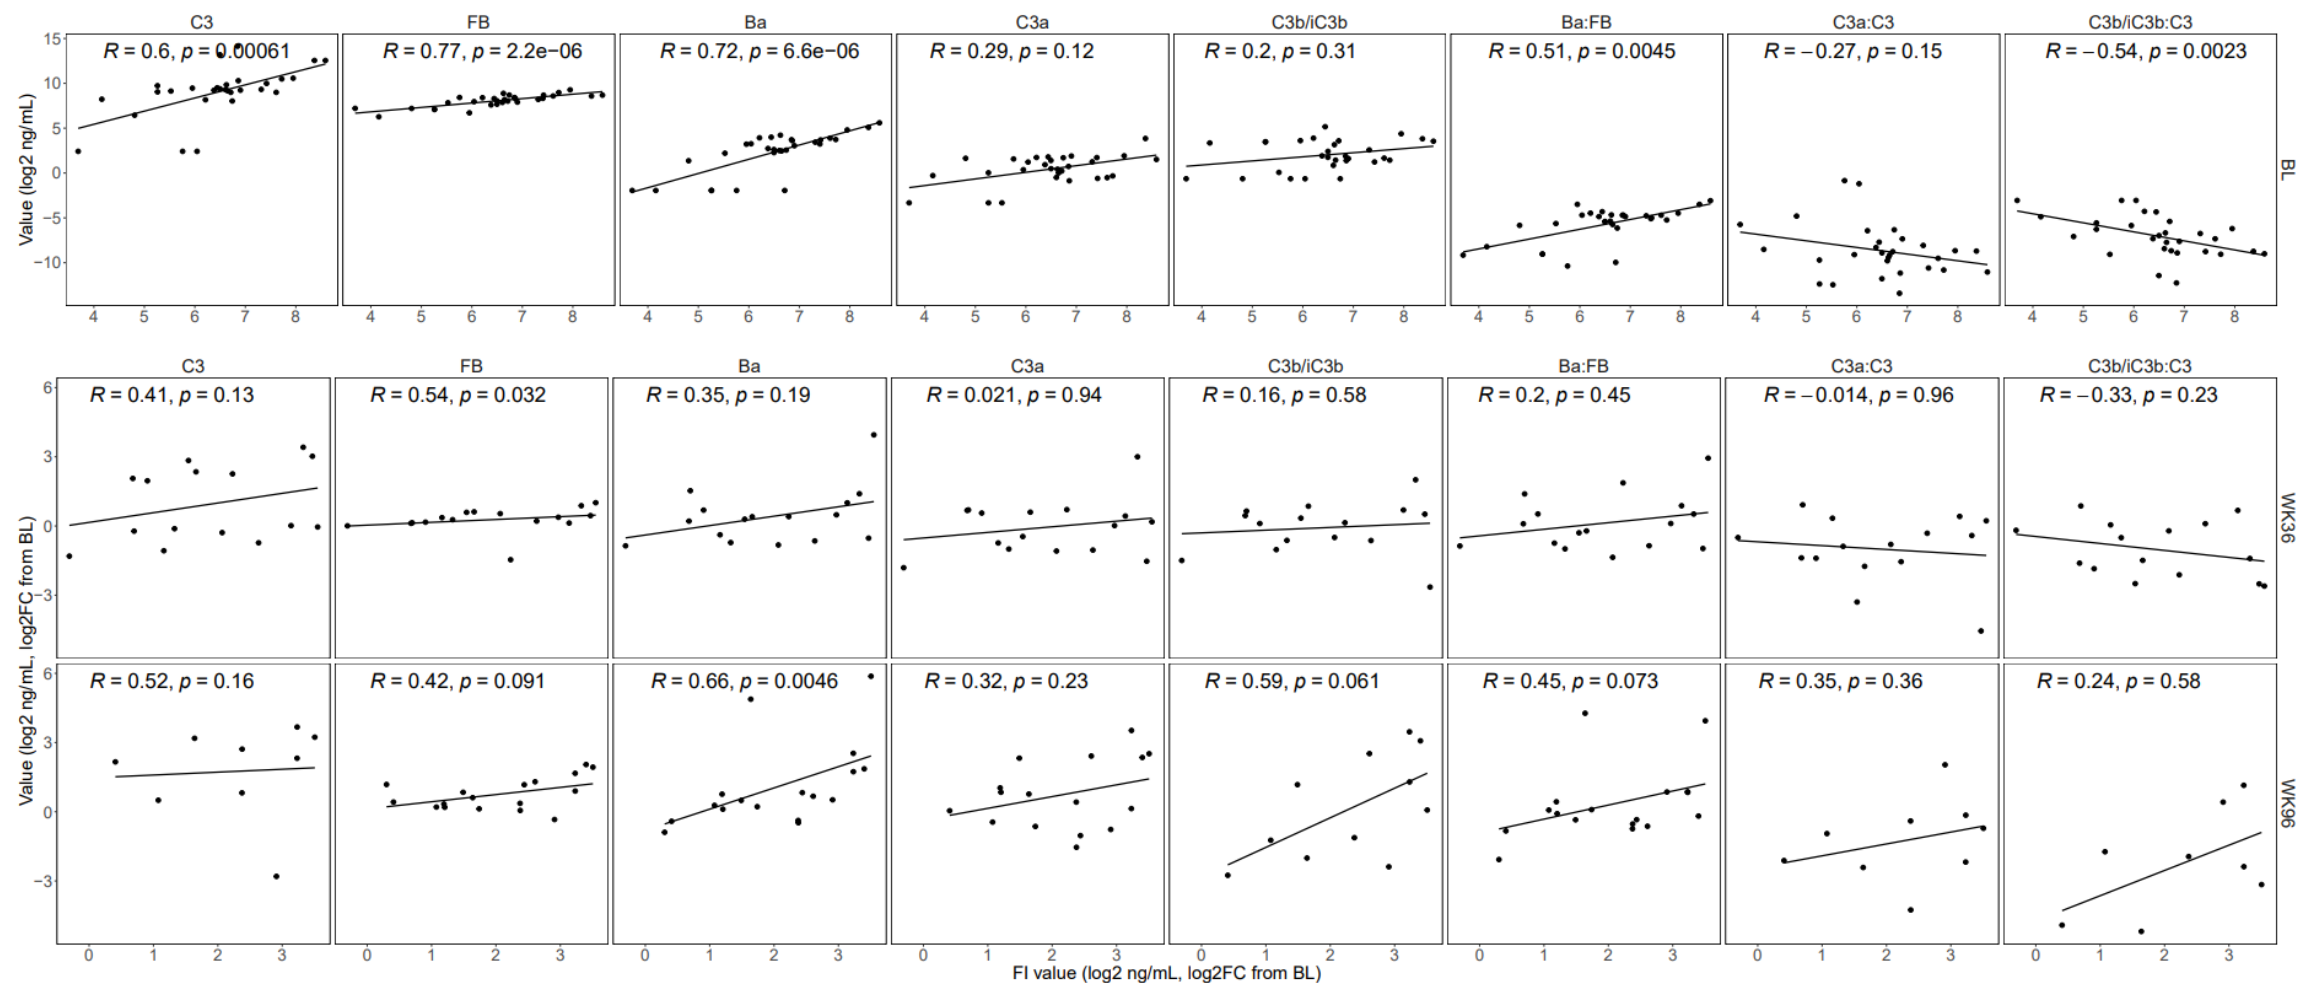

**Supplementary Figure 2.** AH complement biomarker pairwise correlation analysis. Pairwise correlation analysis of FI with intact complement proteins and breakdown products and ratios in the aqueous humor at baseline, week 36 and week 96 from subjects in cohorts 1 to 4. FI concentrations are shown by the X-axis while biomarker concentrations and ratios are shown by the y-axis. Correlations at BL are determined using log<sub>2</sub> ng/mL concentrations, correlations at weeks 36 and 96 are determined using log<sub>2</sub> fold change from BL. BL = Baseline; WK = week; FC = Fold Change; R = Spearman Correlation Coefficient; p = p-value.

# S Figure 3 – C3b/iC3b modulation after PPY988 delivery

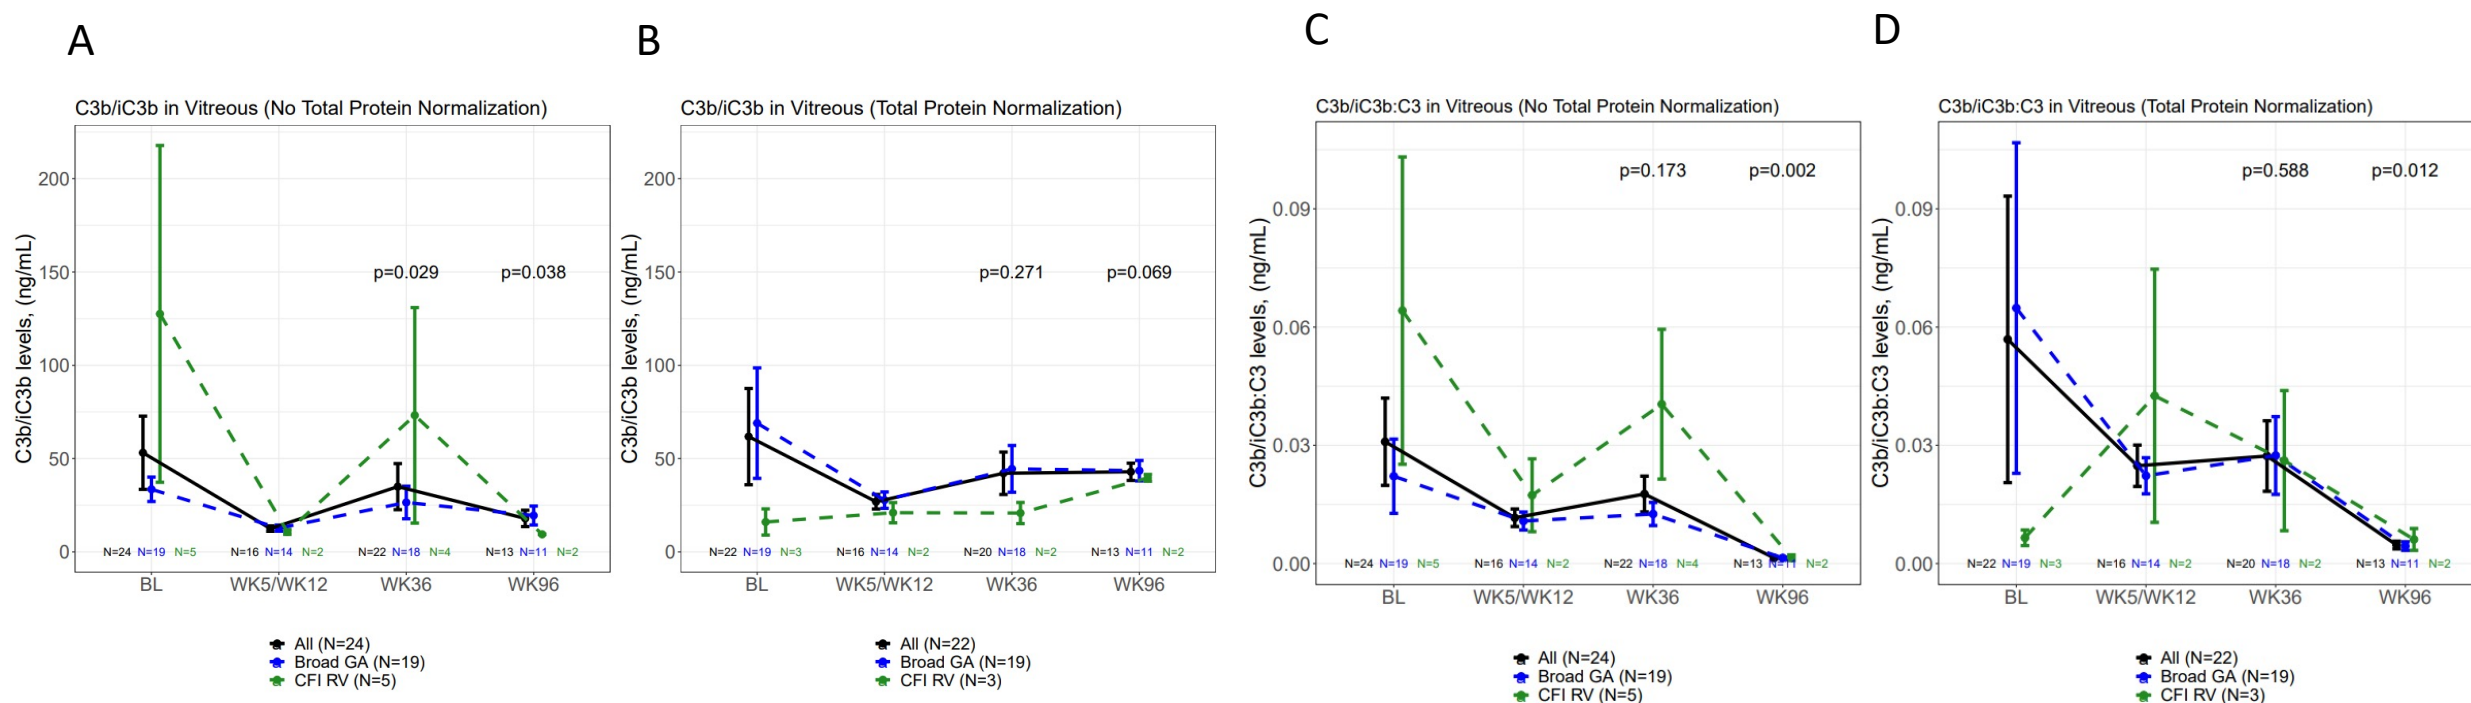

**Supplementary Figure 3.** Modulation of C3b/iC3b and C3b/iC3b:C3 by PPY988 delivery. (A,B) C3b/iC3b concentrations (y-axis, ng/mL) in VH samples by week post-surgery (x-axis) from subjects in cohorts 1 to 4. Mean +/- SE is shown by bars for all (black lines) broad (blue lines) and CFI RV (green lines) groups. Significant reductions in C3b/iC3b were observed at week 36 for both non-normalised (P=0.029) (A) but not total protein (TP) normalised (P=0.271) (B) data, and at week 96 for non-normalised (P=0.038) but not TP normalised (P=0.069) data. Notably these reductions are modest compared to for Ba modulation. (C,D) Ratios of C3b/iC3b:C3 concentration (Y-axis, ng/mL) were calculated for each subject at each sampling post-surgery week (X-axis). Mean +/- SE is shown by bars for all (black lines) broad (blue lines) and CFI RV (green lines) groups. No reductions were observed at week 36 for either non-normalised (P=0.173) (C) or TP normalised (P=0.588) (D) C3b/iC3b:C3 ratios. However, reductions were observed at week 96 for non-normalized (P=0.002) and TP normalized (P=0.012) C3b/iC3b:c3 ratios. Significance is defined as \*P<0.05; \*\*P<0.01, \*\*\*P<0.001. N numbers are shown above X-axis. BL = Baseline; WK= week.



## S Figure 4. Classical pathway engagement after PPY988 delivery

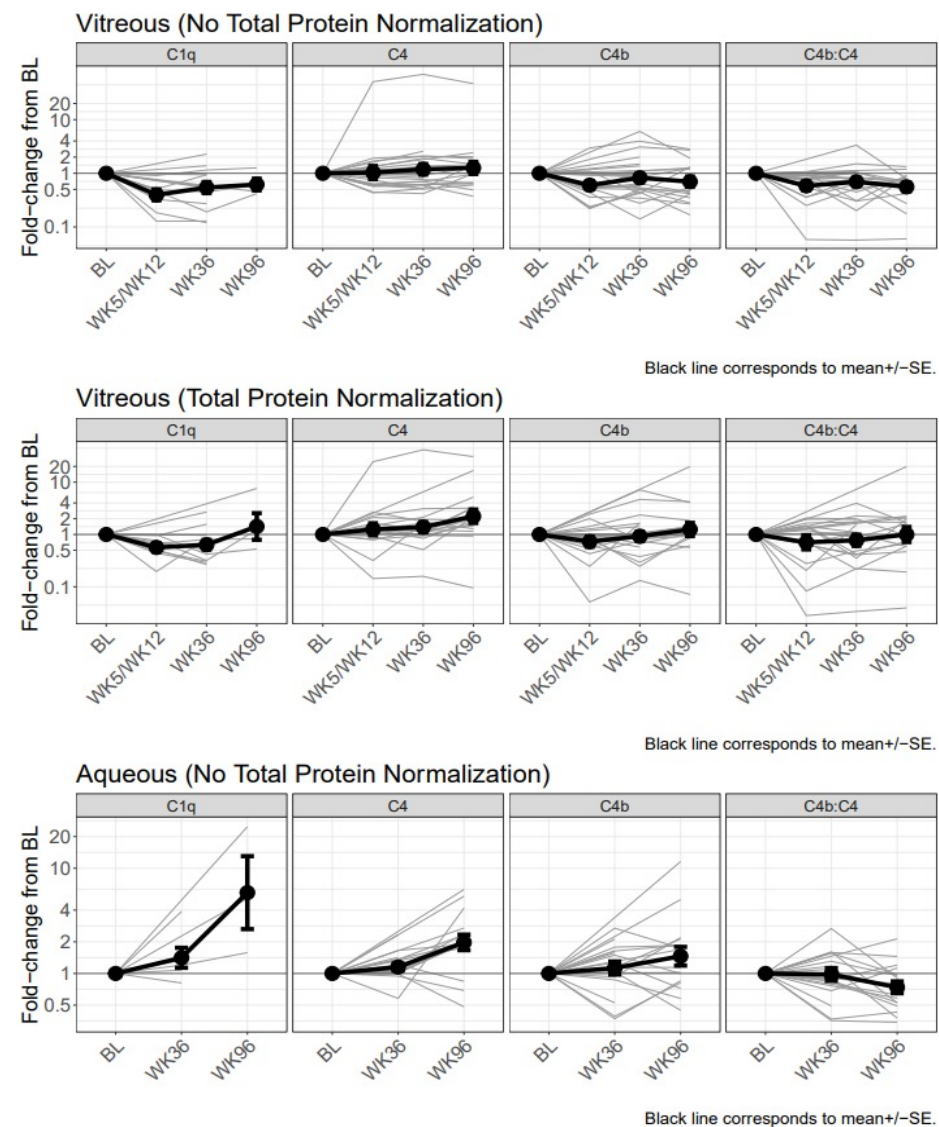

**Supplementary Figure 4.** Classical pathway (CP) engagement post-treatment with PPY988. Fold-changes (y-axis) in CP complement biomarkers [C1q, C4, C4b and C4b:C4] concentrations from baseline at each post-surgery week (VH: week 5/12, 36 and 96; AH: week 36 and 96; X-axis) are shown in VH with no normalisation (A), VH with total protein normalisation (B), and AH with no normalisation. Mean is shown by thick black lines, +/- SE is shown by bars. Individual subject changes are shown by grey lines. BL = Baseline; WK= week.

## S Figure 5. Complement Biomarker VH vs AH BL and OT

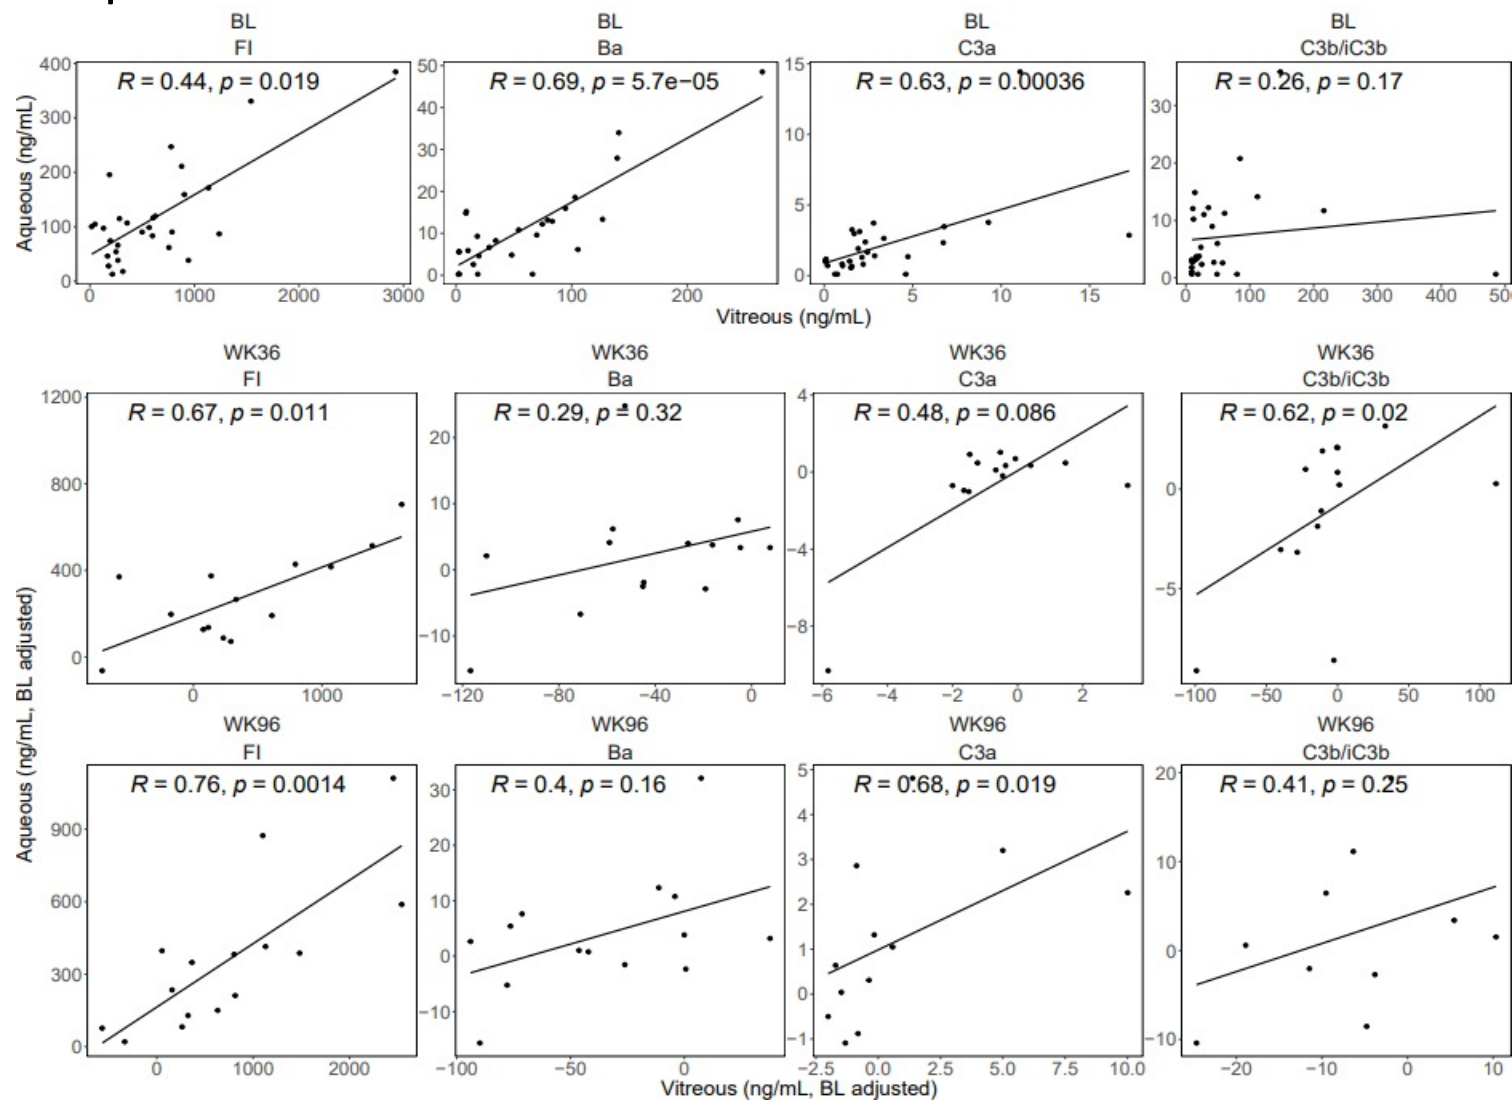

**Supplementary Figure 5.** Pairwise correlation analysis of vitreous versus aqueous humor complement biomarkers at baseline and post-treatment from subjects in cohorts 1 to 4. VH concentrations on x-axis and AH concentrations on y-axis of FI, Ba, C3a and C3b/iC3b at baseline, week 36 and week 96 post-surgery. Vitreous and aqueous concentrations of FI and C3a significantly correlate at all time points, Ba concentrations correlate only at baseline, while C3b/iC3b concentrations only correlate significantly at week 36 post-treatment. BL = Baseline; WK = week; R = Spearman Correlation Coefficient;  $p = p\text{-value}$ .

## S Figure 6. Olink analyses

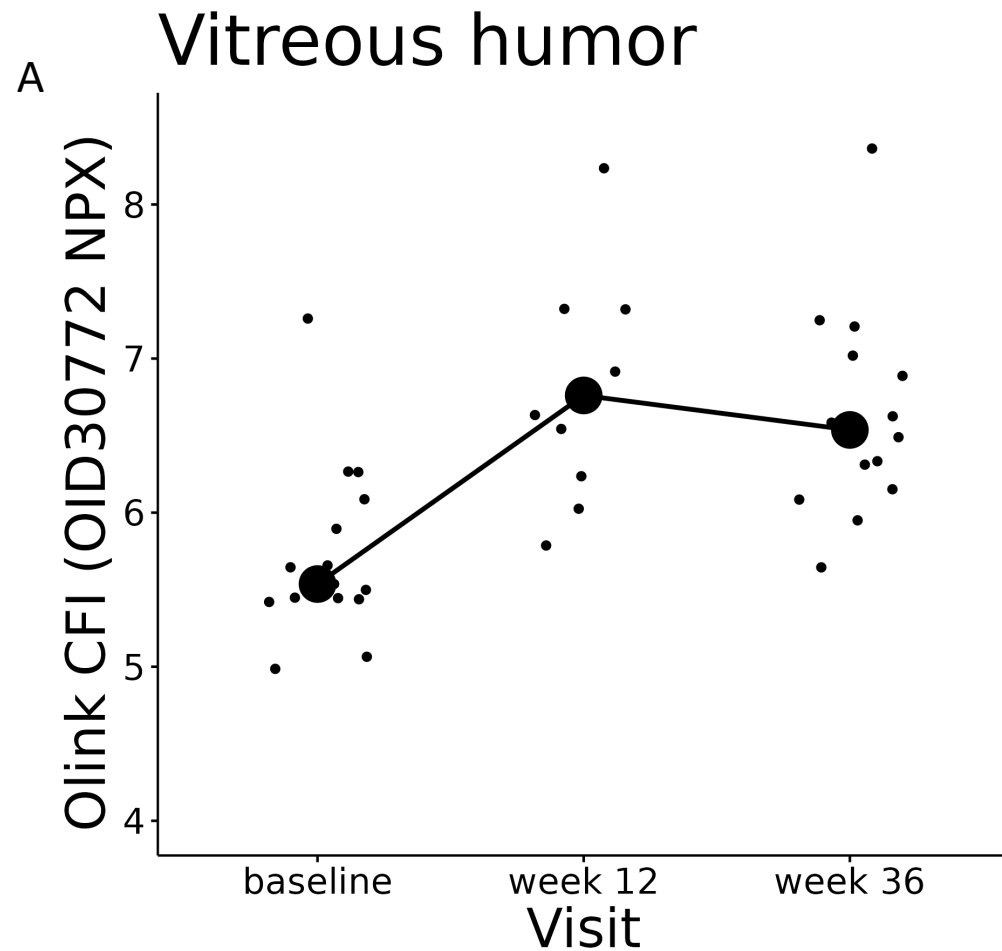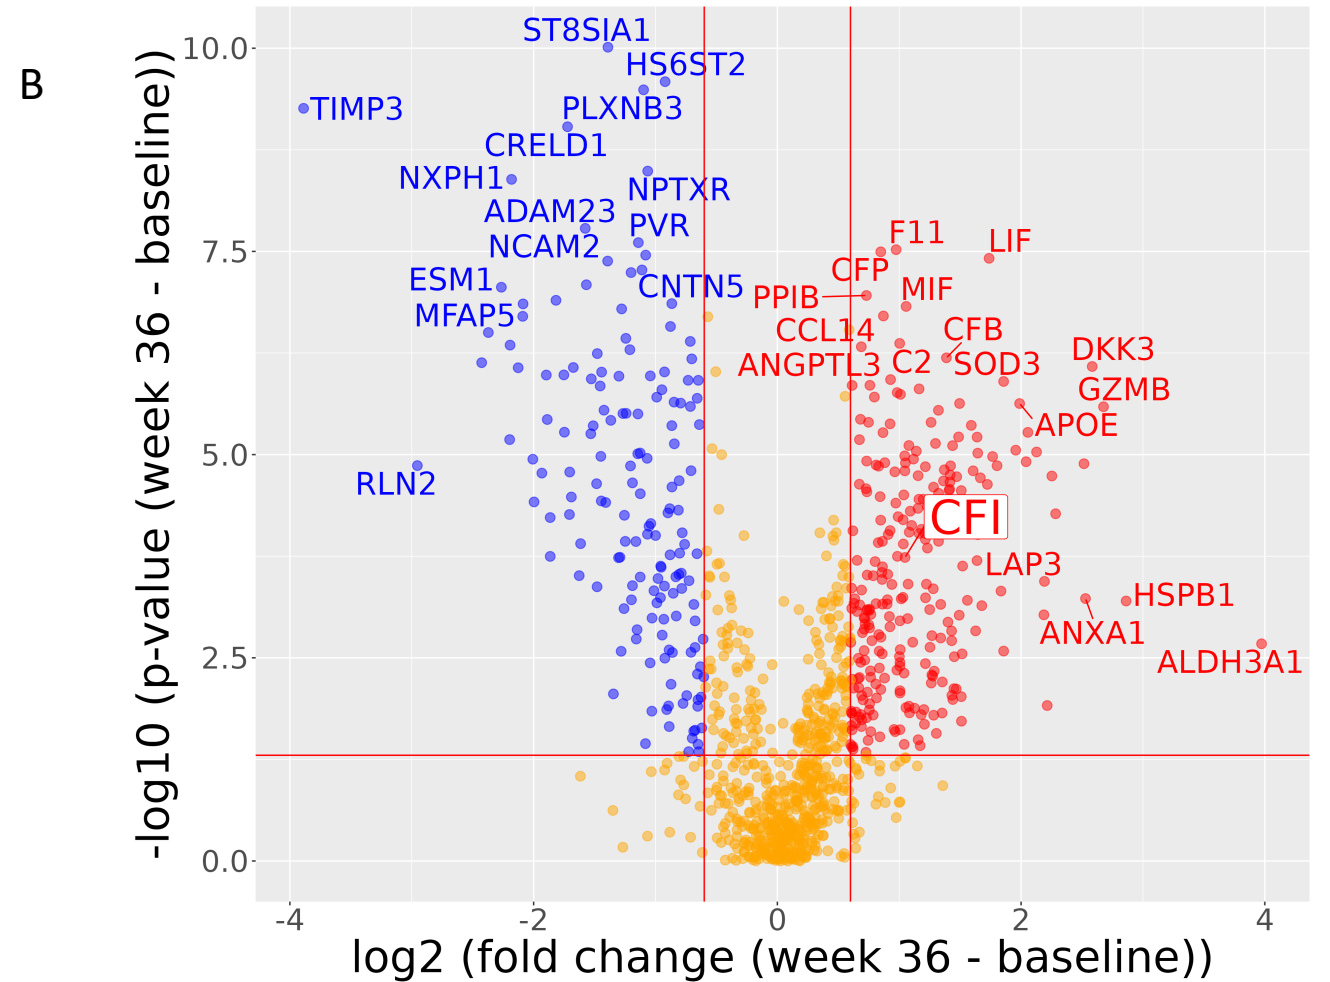

**Supplementary Figure 6.** Proteomic analysis of vitreous humor using Olink. **(A)** Change in FI levels (Olink OID30772) over time. Median FI values measured at baseline, week 12, and week 36 are linked. Sample numbers were baseline; n=17, week 12; n=14, week 36; n=17. **(B)** Volcano plot of differential protein expression (week 36 relative to baseline). Minimum protein fold-change was set at absolute 1.5. Data points with a nominal p-value of less than 0.05 were considered statistically significant (red dots indicate significantly upregulated proteins, blue dots indicate significantly downregulated proteins and orange dots represent no significant change on a log<sub>2</sub> scale).

# S Figure 7. Comparability of commercial FI to PPY988 FI potency

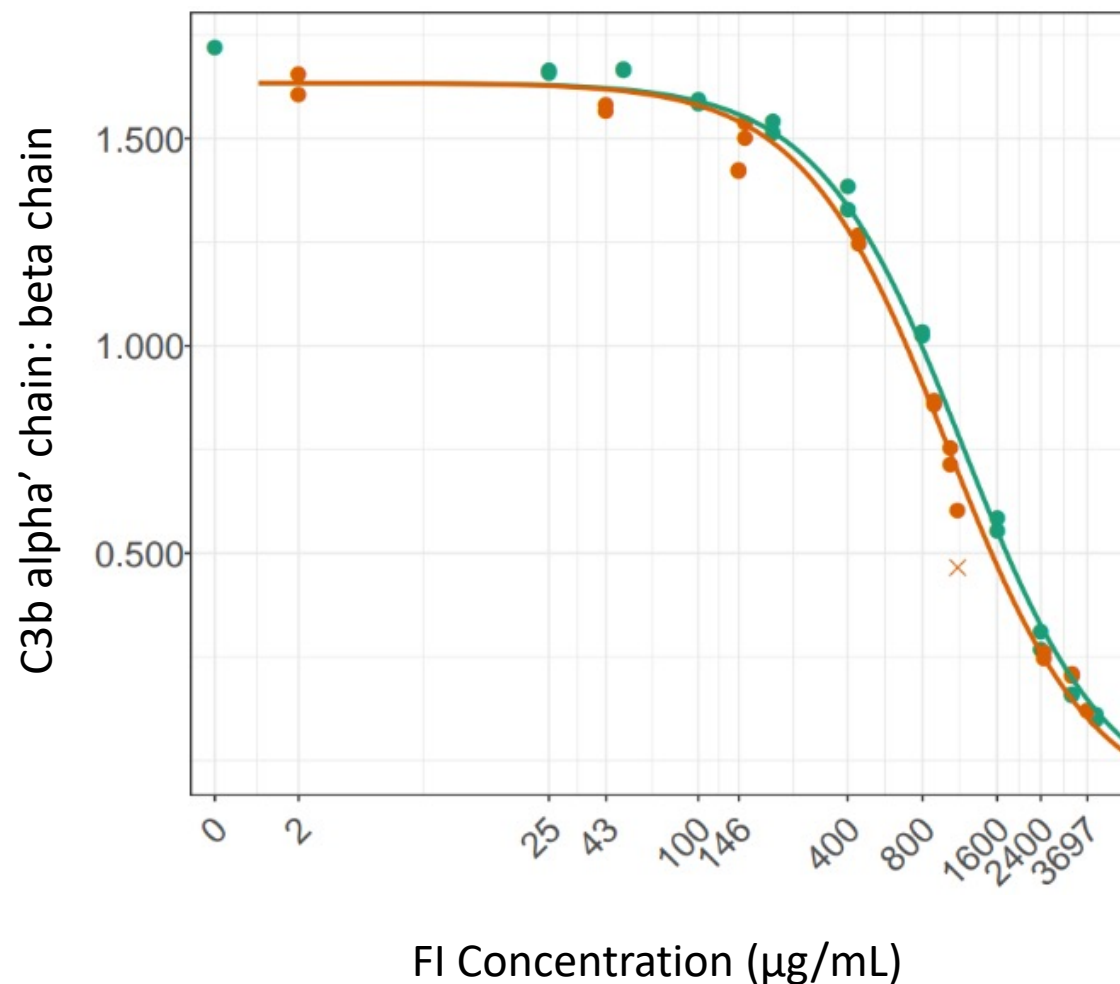

**Supplementary Figure 7.** Comparability of commercial FI to AAV2-*CFI* potency. C3b alpha' chain breakdown normalised to C3b intact beta chain (y-axis) produced by increasing concentrations of PPY988 (GMP#3) in orange compared to commercial FI (Complement Technology (CompTech), Inc) in green. The serum purified CompTech FI protein was diluted in non-transduced control sample so that both FI (reference sample) and PPY988 FI (test sample) were in the same background matrix to ensure comparability. No difference in potency was observed between PPY988 and CompTech FI Protein. Relative Potency of PPY988: **1.151**; 95% CI range: 1.065-1.244; Precision: 1.168. See supplemental methods for further details.

## S Table 1. Overview of FOCUS Part 1 and 2 study design, dose, number of subjects and biomarker matrices

| Part (name)                | Cohort | SR delivery method | PPY988 dose [vg/eye]                                      | Subjects (n) | Biomarker matrix; sampling timepoints                                         |
|----------------------------|--------|--------------------|-----------------------------------------------------------|--------------|-------------------------------------------------------------------------------|
| <b>1 (dose escalation)</b> | 1      | Standard           | low, 2E10                                                 | 3            | VH; BL, week 5, 36, 96<br>AH; BL, week 36, 96<br>Plasma: BL, week 5, 36, 96   |
|                            | 2      |                    | mid, 5E10                                                 | 4            | VH; BL, week 5, 36, 96<br>AH; BL, week 36, 96<br>Plasma: BL, week 12, 36, 96  |
|                            | 3      |                    | high, 2E11                                                | 4            | VH, BL, week 12, 36, 96<br>AH; BL, week 36, 96<br>Plasma: BL, week 12, 36, 96 |
| <b>2 (dose expansion)</b>  | 4      | Standard           | low, 2E10 (n=3);<br>mid, 5E10 (n=6);<br>high, 2E11 (n=11) | 20           | VH, BL, week 12, 36, 96<br>AH; BL, week 36, 96<br>Plasma: BL, week 12, 36, 96 |

**Supplementary Table 1.** FOCUS study overview. FOCUS consisted of four parts of either PPY988 dose escalation or expansion, divided by seven cohorts varying according to route of gene therapy administration, dose (vg; viral genomes), and biomarker matrix. Only Parts 1 and 2 (cohorts 1 to 4) are described given subretinal gene therapy delivery permitted vitreous humour (VH) sampling. VH, aqueous humour (AH) and plasma biomarker samples were collected from subjects prior to surgery at baseline (BL), and subsequent timepoints up to week 96 post-treatment. Emerging data and analysis on cohorts 1 and 2 indicated week 5 sampling from the VH was too early to evaluate an impact post-vitreotomy, so the first post-treatment evaluation for cohorts 3 and 4 was moved to a later time-point in the study (week 12), when it was expected that the proteome would have stabilised, and the transduced cells achieved maximal expression.

## S Table 2. FOCUS sample N numbers (at least one BL and one week 36/ week 96 successfully measured)

## Vitreous

| Visit                | FI | C3 | FB | FH | C1q | Ba | C3a | C3b/iC3b | C4 | C4b | Ba:FB | C3a:C3 | C3b/iC3b:C3 | C4b:C4 | C5 | FD | MBL |
|----------------------|----|----|----|----|-----|----|-----|----------|----|-----|-------|--------|-------------|--------|----|----|-----|
| <b>BL/pre-dosing</b> | 24 | 24 | 24 | 24 | 15  | 23 | 24  | 24       | 24 | 24  | 23    | 24     | 24          | 24     | 23 | 24 | 24  |
| <b>Week 5/12</b>     | 16 | 16 | 16 | 16 | 8   | 16 | 16  | 16       | 16 | 16  | 16    | 16     | 16          | 16     | 15 | 16 | 16  |
| <b>Week 36</b>       | 22 | 22 | 22 | 22 | 14  | 21 | 22  | 22       | 22 | 22  | 21    | 22     | 22          | 22     | 21 | 22 | 22  |
| <b>Week 96</b>       | 17 | 17 | 17 | 17 | 4   | 16 | 15  | 13       | 17 | 16  | 16    | 15     | 13          | 16     | 16 | 17 | 17  |

## Aqueous

| Visit                | FI | C3 | FB | FH | C1q | Ba | C3a | C3b/iC3b | C4 | C4b | Ba:FB | C3a:C3 | C3b/iC3b:C3 | C4b:C4 | C5 | FD | MBL |
|----------------------|----|----|----|----|-----|----|-----|----------|----|-----|-------|--------|-------------|--------|----|----|-----|
| <b>BL/pre-dosing</b> | 20 | 19 | 20 | 20 | 8   | 20 | 20  | 19       | 20 | 20  | 20    | 19     | 19          | 20     | 19 | 20 | 20  |
| <b>Week 5/12</b>     | 0  | 0  | 0  | 0  | 0   | 0  | 0   | 0        | 0  | 0   | 0     | 0      | 0           | 0      | 0  | 0  | 0   |
| <b>Week 36</b>       | 16 | 15 | 16 | 16 | 6   | 16 | 16  | 15       | 16 | 16  | 16    | 15     | 15          | 16     | 16 | 16 | 16  |
| <b>Week 96</b>       | 16 | 8  | 16 | 16 | 3   | 16 | 15  | 10       | 16 | 16  | 16    | 8      | 7           | 16     | 15 | 16 | 16  |

## Plasma

| Visit                | FI | C3 | FB | FH | C1q | Ba | C3a | C3b/iC3b | C4 | C4b | Ba:FB | C3a:C3 | C3b/iC3b:C3 | C4b:C4 | C5 | FD | MBL |
|----------------------|----|----|----|----|-----|----|-----|----------|----|-----|-------|--------|-------------|--------|----|----|-----|
| <b>BL/pre-dosing</b> | 15 | 16 | 16 | 16 | 9   | 20 | 13  | 12       | 16 | 17  | 13    | 13     | 12          | 16     | 17 | 15 | 17  |
| <b>Week 5/12</b>     | 0  | 0  | 0  | 0  | 0   | 0  | 0   | 0        | 0  | 0   | 0     | 0      | 0           | 0      | 0  | 0  | 0   |
| <b>Week 36</b>       | 15 | 16 | 16 | 16 | 9   | 20 | 13  | 12       | 16 | 17  | 13    | 13     | 12          | 16     | 17 | 15 | 17  |
| <b>Week 96</b>       | 0  | 0  | 0  | 0  | 0   | 0  | 0   | 0        | 0  | 0   | 0     | 0      | 0           | 0      | 0  | 0  | 0   |

**Supplementary Table 2.** Number of FOCUS samples analysed longitudinally across study. VH and AH samples from subjects in cohorts 1 to 4 that passed acceptance criteria taken at baseline (BL) and at each timepoint post treatment are provided. Only those subjects with sampling at both BL and at least one of week 36 or 96 time-points are included.

# S Table 3. VH Complement Biomarker baseline descriptive stats (ng/mL)

| Biomarker   | n  | Mean     | SD       | Median  | 25 <sup>th</sup> Percentile | 75 <sup>th</sup> Percentile | Minimum | Maximum  | LOD    | N LOD | ULOQ   | N ULOQ |
|-------------|----|----------|----------|---------|-----------------------------|-----------------------------|---------|----------|--------|-------|--------|--------|
| FI          | 29 | 608.88   | 587.42   | 499.91  | 215                         | 785.62                      | 16.91   | 2924.77  | 4.625  | 0     | 12500  | 0      |
| C3          | 29 | 17350.67 | 74622.03 | 2163.41 | 1104.46                     | 5344.56                     | 53.7    | 404817.6 | 53.7   | 2     | 60000  | 0      |
| FB          | 29 | 1083.14  | 817.41   | 765     | 504.85                      | 1402.1                      | 11.81   | 3037.52  | 5.8    | 0     | 6000   | 0      |
| FH          | 29 | 466.7    | 427.59   | 273.56  | 181.66                      | 652.73                      | 20.7    | 1430.34  | 20.7   | 1     | 30000  | 0      |
| C1q         | 19 | 140.45   | 106.43   | 126.07  | 70.85                       | 179.48                      | 18.48   | 478.34   | 18.48  | 2     | 7200   | 0      |
| Ba          | 28 | 58.07    | 60.43    | 41.3    | 10.06                       | 86.07                       | 2.08    | 264.86   | 2.6    | 4     | 416    | 0      |
| C3a         | 28 | 3.36     | 3.83     | 2.06    | 1.34                        | 3.68                        | 0.05    | 17.23    | 0.05   | 1     | 125    | 0      |
| C3b/iC3b    | 29 | 59.01    | 94.58    | 24.97   | 13.68                       | 57.56                       | 9.4     | 485.39   | 9.405  | 4     | 15000  | 0      |
| C4          | 29 | 2488.05  | 1998.79  | 1929.44 | 810.08                      | 3472.82                     | 31.51   | 7185.16  | 28.8   | 0     | 40000  | 0      |
| C4b         | 29 | 130.76   | 137.09   | 112     | 17.49                       | 180.12                      | 3.77    | 640.53   | 15.55  | 3     | 25000  | 0      |
| Ba:FB       | 28 | 0.05     | 0.05     | 0.04    | 0.02                        | 0.06                        | 0       | 0.22     | NA     | 0     | NA     | 0      |
| C3a:C3      | 28 | 0        | 0.01     | 0       | 0                           | 0                           | 0       | 0.03     | NA     | 0     | NA     | 0      |
| C3b/iC3b:C3 | 29 | 0.04     | 0.06     | 0.01    | 0.01                        | 0.03                        | 0       | 0.21     | NA     | 0     | NA     | 0      |
| C4b:C4      | 29 | 0.06     | 0.09     | 0.04    | 0.02                        | 0.07                        | 0       | 0.49     | NA     | 0     | NA     | 0      |
| C5          | 27 | 322.23   | 412.28   | 137     | 137                         | 320.05                      | 137     | 2022     | 137    | 14    | 100000 | 0      |
| FD          | 29 | 98.45    | 116.77   | 59.43   | 41.42                       | 113.73                      | 4.81    | 600.14   | 0.8625 | 0     | 625    | 0      |
| MBL         | 29 | 0.83     | 0.44     | 0.62    | 0.62                        | 0.86                        | 0.3     | 2.31     | 0.625  | 15    | 1250   | 0      |

**Supplementary Table 3.** Descriptive statistics of vitreous humour baseline complement biomarkers concentrations from subjects in cohorts 1 to 4. The number of samples correspond to the total number which could be measured and had a value within acceptance criteria. All concentrations shown are expressed in ng/mL.

# S Table 4. AH Complement Biomarker baseline descriptive stats (ng/mL)

| Biomarker   | n  | Mean    | SD     | Median | 25 <sup>th</sup> Percentile | 75 <sup>th</sup> Percentile | Minimum | Maximum  | LOD    | N LOD | ULOQ  | N ULOQ |
|-------------|----|---------|--------|--------|-----------------------------|-----------------------------|---------|----------|--------|-------|-------|--------|
| FI          | 30 | 117.22  | 86.85  | 98.04  | 62.91                       | 149.36                      | 12.9    | 384.48   | 7.24   | 0     | 10000 | 0      |
| C3          | 29 | 1881.16 | 3753.1 | 626.81 | 509.15                      | 1016.37                     | 5.34    | 18027.98 | 5.34   | 3     | 60000 | 2      |
| FB          | 30 | 292.98  | 125.62 | 293.88 | 210.25                      | 373.01                      | 77.29   | 620.46   | 0.82   | 0     | 600   | 0      |
| FH          | 30 | 81.97   | 53.39  | 70.97  | 45.81                       | 116.55                      | 0.61    | 225.46   | 0.61   | 1     | 3000  | 0      |
| C1q         | 18 | 12.81   | 12.07  | 13.43  | 1.64                        | 19.5                        | 1.64    | 42.29    | 1.644  | 8     | 720   | 0      |
| Ba          | 30 | 10.58   | 10.71  | 8.78   | 4.68                        | 13.3                        | 0.26    | 48.5     | 0.26   | 6     | 41.6  | 0      |
| C3a         | 30 | 2.23    | 2.59   | 1.53   | 0.8                         | 3.08                        | 0.1     | 14.43    | 0.1    | 3     | 62.5  | 0      |
| C3b/iC3b    | 29 | 7.17    | 7.72   | 3.7    | 2.35                        | 11.25                       | 0.64    | 35.85    | 0.6425 | 5     | 1500  | 0      |
| C4          | 30 | 533.3   | 309.05 | 494.6  | 273.48                      | 739.33                      | 133.86  | 1304.22  | 2.25   | 0     | 4000  | 0      |
| C4b         | 30 | 28.12   | 19.1   | 22.46  | 13.96                       | 42.28                       | 1.1     | 74.92    | 13.96  | 11    | 20000 | 0      |
| Ba:FB       | 30 | 0.03    | 0.03   | 0.03   | 0.02                        | 0.04                        | 0       | 0.12     | NA     | 0     | NA    | 0      |
| C3a:C3      | 29 | 0.04    | 0.13   | 0      | 0                           | 0                           | 0       | 0.56     | NA     | 0     | NA    | 0      |
| C3b/iC3b:C3 | 29 | 0.02    | 0.04   | 0.01   | 0                           | 0.02                        | 0       | 0.12     | NA     | 0     | NA    | 0      |
| C4b:C4      | 30 | 0.06    | 0.03   | 0.06   | 0.03                        | 0.09                        | 0       | 0.12     | NA     | 0     | NA    | 0      |
| C5          | 30 | 185.77  | 290.99 | 109.6  | 109.6                       | 109.6                       | 56.89   | 1424     | 109.6  | 21    | 80000 | 0      |
| FD          | 30 | 49.39   | 36.58  | 39.08  | 27.62                       | 55.55                       | 13.97   | 169.61   | 0.69   | 0     | 500   | 0      |
| MBL         | 30 | 0.77    | 0.35   | 0.81   | 0.81                        | 0.81                        | 0.18    | 2.3      | 0.81   | 24    | 1000  | 0      |

**Supplementary Table 4.** Descriptive statistics of aqueous humour baseline complement biomarkers concentrations from subjects in cohorts 1 to 4. The number of samples correspond to the total number which could be measured and had a value within acceptance criteria. All concentrations shown are expressed in ng/mL.



# S Table 5. Plasma Complement Biomarker baseline descriptive stats (ng/mL)

| Biomarker   | n  | Mean     | SD       | Median   | 25 <sup>th</sup> Percentile | 75 <sup>th</sup> Percentile | Minimum  | Maximum  | LOD   | N LOD | ULOQ    | N ULOQ |
|-------------|----|----------|----------|----------|-----------------------------|-----------------------------|----------|----------|-------|-------|---------|--------|
| FI          | 17 | 49870.41 | 24289.4  | 39078.61 | 33021.08                    | 72494.63                    | 22808.29 | 103375.3 | 69.4  | 0     | 100000  | 0      |
| C3          | 18 | 962012.1 | 1043101  | 604199   | 505331.4                    | 892754.6                    | 283085.1 | 4823003  | 2220  | 0     | 2400000 | 0      |
| FB          | 16 | 300852.6 | 121657.1 | 337809.1 | 199806.7                    | 405761.4                    | 105039   | 509413.1 | 328   | 0     | 240000  | 0      |
| FH          | 18 | 533381   | 232796.5 | 486689   | 369826.8                    | 558282.9                    | 306135.1 | 1182989  | 820   | 0     | 1200000 | 0      |
| C1q         | 11 | 277162.5 | 190015.1 | 230509.1 | 136774.3                    | 362309.1                    | 38599.86 | 601720.6 | 739.2 | 0     | 288000  | 0      |
| Ba          | 24 | 1463     | 843.96   | 1309.74  | 940.7                       | 1693.52                     | 572.56   | 3994.84  | 40    | 0     | 8320    | 0      |
| C3a         | 13 | 82.78    | 39.61    | 72.61    | 58.45                       | 106.75                      | 34.61    | 167.01   | 0.8   | 0     | 500     | 0      |
| C3b/iC3b    | 12 | 2304.74  | 1409.21  | 1849.01  | 1280.33                     | 2464.01                     | 1068.35  | 5007.02  | 174   | 0     | 600000  | 0      |
| C4          | 18 | 844393.7 | 548014.1 | 772567.2 | 319323.1                    | 1220485                     | 213627.3 | 1984159  | 1300  | 0     | 1600000 | 0      |
| C4b         | 19 | 92538.56 | 92460.5  | 39370.39 | 35871.43                    | 134493.1                    | 32750.46 | 294918   | 157   | 0     | 200000  | 0      |
| Ba:FB       | 13 | 0.01     | 0.01     | 0        | 0                           | 0.01                        | 0        | 0.02     | NA    | 0     | NA      | 0      |
| C3a:C3      | 13 | 0        | 0        | 0        | 0                           | 0                           | 0        | 0        | NA    | 0     | NA      | 0      |
| C3b/iC3b:C3 | 12 | 0        | 0        | 0        | 0                           | 0                           | 0        | 0        | NA    | 0     | NA      | 0      |
| C4b:C4      | 18 | 0.12     | 0.06     | 0.12     | 0.07                        | 0.16                        | 0.02     | 0.22     | NA    | 0     | NA      | 0      |
| C5          | 19 | 184245.6 | 58160.91 | 166647.7 | 147884.4                    | 214571.5                    | 112160.5 | 300772.6 | 864.8 | 0     | 800000  | 0      |
| FD          | 17 | 3488.28  | 1266.75  | 3895.65  | 2414.58                     | 4350.97                     | 1676.85  | 6036.23  | 4.5   | 0     | 5000    | 0      |
| MBL         | 19 | 2083.38  | 2020.93  | 915.63   | 707.42                      | 3337.35                     | 101.59   | 7415.09  | 3.3   | 0     | 10000   | 0      |

**Supplementary Table 5.** Descriptive statistics of plasma baseline complement biomarkers concentrations from subjects in cohorts 1 to 4. The number of samples correspond to the total number which could be measured and had a value within acceptance criteria. All concentrations shown are expressed in ng/mL.

**Supplementary Table 6. Temporal change in protein levels as evaluated using the Olink platform.**

Spreadsheet listing Olink (<https://olink.com/>) protein identifiers (IDs) that passed quality control alongside metrics for differential expression in vitreous humor comparing baseline to post-treatment at week 12 and week 36 timepoints. fdr = false discovery rate; NPX = normalised protein expression.

| OlinkID  | symbol   | Olink panel     | median_NPX (baseline) | median_NPX (week 12) | median_NPX (week 36) | p_value (week 12 - baseline) | fdr (week 12 - baseline) | fold change (week 12 - baseline) | p_value (week 36 - baseline) | fdr (week 36 - baseline) | fold change (week 36 - baseline) |
|----------|----------|-----------------|-----------------------|----------------------|----------------------|------------------------------|--------------------------|----------------------------------|------------------------------|--------------------------|----------------------------------|
| OID20051 | HNRNPK   | Cardiometabolic | -3.12295              | -2.0972              | -2.64035             | 0.014699                     | 0.028414                 | 2.049611                         | 0.37648                      | 0.456654                 | 1.219128                         |
| OID20052 | CEBPB    | Cardiometabolic | -1.0125               | -0.21365             | -0.249               | 0.013955                     | 0.027176                 | 1.266546                         | 0.058387                     | 0.096841                 | 1.705684                         |
| OID20055 | CRHR1    | Cardiometabolic | -0.4056               | 0.00055              | 0.06065              | 0.327746                     | 0.399406                 | 1.1776                           | 0.185553                     | 0.254671                 | 1.381514                         |
| OID20062 | AKR1C4   | Cardiometabolic | -0.78755              | -0.81395             | -0.2486              | 0.214993                     | 0.282709                 | 1.453368                         | 0.20042                      | 0.270678                 | 1.751693                         |
| OID20064 | SERPINB5 | Cardiometabolic | -2.53095              | 0.23315              | -0.08395             | 0.000126                     | 0.000502                 | 5.307932                         | 0.004613                     | 0.012001                 | 2.44037                          |
| OID20065 | HK2      | Cardiometabolic | -0.34135              | -0.24105             | -0.3366              | 0.241496                     | 0.310132                 | 1.234605                         | 0.941123                     | 0.954158                 | 1.08666                          |
| OID20067 | VSTM2L   | Cardiometabolic | 1.9692                | 1.30905              | 1.37605              | 0.056673                     | 0.089278                 | -1.59842                         | 0.051732                     | 0.086853                 | -1.70385                         |
| OID20068 | TIA1     | Cardiometabolic | -1.2432               | 0.0282               | -0.154               | 0.001264                     | 0.003452                 | 2.119318                         | 0.006469                     | 0.015962                 | 2.399943                         |
| OID20069 | CNPY2    | Cardiometabolic | 0.2917                | 0.75625              | 0.60015              | 0.045243                     | 0.074366                 | 1.404786                         | 0.136512                     | 0.197483                 | 1.453469                         |
| OID20072 | SUSD1    | Cardiometabolic | -4.56985              | -4.345               | -4.42105             | 0.315394                     | 0.386499                 | 1.1776                           | 0.338239                     | 0.419646                 | 1.534002                         |
| OID20074 | TNF      | Cardiometabolic | -0.6919               | 0.1163               | 0.19355              | 0.090972                     | 0.134905                 | 1.225822                         | 0.059468                     | 0.09819                  | 2.008544                         |

|          |          |                 |          |          |          |          |          |          |          |          |          |
|----------|----------|-----------------|----------|----------|----------|----------|----------|----------|----------|----------|----------|
| OID20079 | ACTA2    | Cardiometabolic | -1.5104  | -0.8014  | -0.41595 | 0.013183 | 0.026128 | 1.375446 | 0.001313 | 0.004267 | 1.897434 |
| OID20081 | EDIL3    | Cardiometabolic | 0.7179   | 0.54985  | 0.6915   | 0.300225 | 0.372628 | -1.05457 | 0.261678 | 0.338425 | 1.335056 |
| OID20083 | PTN      | Cardiometabolic | 6.1776   | 6.6878   | 6.71405  | 0.240719 | 0.309781 | 1.423014 | 0.040851 | 0.070748 | 1.400022 |
| OID20086 | COMT     | Cardiometabolic | -3.1683  | -1.76115 | -2.2563  | 0.001018 | 0.002926 | 2.291036 | 0.032182 | 0.057832 | 2.227615 |
| OID20087 | MMP7     | Cardiometabolic | -1.2438  | -0.97405 | -0.93775 | 0.67172  | 0.728083 | 1.079789 | 0.237966 | 0.311407 | 1.398713 |
| OID20089 | ADAMTS16 | Cardiometabolic | -1.056   | -0.8707  | -0.74315 | 0.225748 | 0.292579 | -1.072   | 0.712485 | 0.767722 | -1.00298 |
| OID20090 | GP2      | Cardiometabolic | -5.38955 | -4.51705 | -4.8175  | 0.12129  | 0.172733 | 1.764611 | 0.292659 | 0.373217 | 1.965573 |
| OID20094 | SLITRK6  | Cardiometabolic | 0.9046   | -0.36395 | -0.107   | 2.92E-08 | 1.52E-06 | -2.23814 | 4.27E-06 | 5.58E-05 | -1.55833 |
| OID20095 | GPR37    | Cardiometabolic | 4.3167   | 1.52145  | 1.69925  | 1.24E-06 | 1.69E-05 | -4.6491  | 7.4E-07  | 2.03E-05 | -5.37532 |
| OID20096 | GZMH     | Cardiometabolic | -5.98065 | -3.7922  | -3.7076  | 1.63E-05 | 9.78E-05 | 4.466981 | 1.83E-05 | 0.000149 | 4.765244 |
| OID20098 | THPO     | Cardiometabolic | -6.9717  | -5.87555 | -6.47275 | 0.007501 | 0.015914 | 1.858257 | 0.098794 | 0.150199 | 1.493762 |
| OID20099 | CLEC1A   | Cardiometabolic | -4.38635 | -4.08795 | -4.02765 | 0.460643 | 0.535224 | 1.031004 | 0.356279 | 0.436601 | -1.05709 |
| OID20100 | ENTPD6   | Cardiometabolic | -0.0159  | -0.59585 | -0.3971  | 0.000272 | 0.000951 | -1.37368 | 0.001534 | 0.004839 | -1.37183 |
| OID20101 | IL6      | Cardiometabolic | 0.13915  | 0.85985  | 1.24275  | 0.160015 | 0.219895 | 1.680686 | 0.015771 | 0.032725 | 1.608928 |
| OID20102 | CEACAM8  | Cardiometabolic | -5.1184  | -4.35085 | -4.2898  | 0.091042 | 0.134905 | 1.897829 | 0.161371 | 0.225427 | 1.775961 |
| OID20103 | S100P    | Cardiometabolic | -3.2768  | -1.6713  | -2.3663  | 0.004923 | 0.011032 | 3.313716 | 0.012443 | 0.027325 | 2.11367  |

|          |          |                 |          |          |          |          |          |          |          |          |          |
|----------|----------|-----------------|----------|----------|----------|----------|----------|----------|----------|----------|----------|
| OID20104 | ENTPD5   | Cardiometabolic | -2.18205 | -1.62835 | -1.61445 | 0.036847 | 0.062339 | 1.602528 | 0.015249 | 0.031831 | 1.526682 |
| OID20105 | ACE2     | Cardiometabolic | -3.3173  | -2.6121  | -2.78    | 0.002155 | 0.005403 | 1.948886 | 0.008034 | 0.018971 | 2.008544 |
| OID20106 | DCN      | Cardiometabolic | -0.83115 | -1.35895 | -1.06985 | 0.057028 | 0.08958  | -1.21348 | 0.139964 | 0.20089  | -1.17985 |
| OID20107 | GLO1     | Cardiometabolic | 0.65635  | 1.86205  | 1.60855  | 4.02E-06 | 3.8E-05  | 2.06401  | 5.8E-05  | 0.000353 | 1.987424 |
| OID20108 | PAG1     | Cardiometabolic | -2.50415 | -2.18245 | -3.03555 | 0.347596 | 0.42033  | 1.249802 | 0.156596 | 0.220157 | -1.38453 |
| OID20109 | ADAM15   | Cardiometabolic | -2.8568  | -3.27655 | -3.19475 | 0.001101 | 0.003099 | -1.33432 | 0.004023 | 0.010696 | -1.18308 |
| OID20110 | USP8     | Cardiometabolic | -4.1697  | -3.72955 | -3.58785 | 0.032681 | 0.056157 | 1.324502 | 0.098246 | 0.149618 | 1.452764 |
| OID20113 | CTSH     | Cardiometabolic | 0.77825  | -0.8898  | -0.5457  | 1.71E-08 | 1.17E-06 | -3.62744 | 9.66E-07 | 2.31E-05 | -2.71726 |
| OID20115 | MSTN     | Cardiometabolic | -0.38575 | -1.6902  | -1.60615 | 2.52E-06 | 2.83E-05 | -2.77733 | 9.77E-06 | 0.000101 | -2.21223 |
| OID20116 | BOC      | Cardiometabolic | -1.82555 | -1.92875 | -1.57635 | 0.920032 | 0.932775 | -1.00553 | 0.008776 | 0.020372 | 1.198891 |
| OID20121 | CCL27    | Cardiometabolic | -4.6039  | -5.76355 | -5.74235 | 1.09E-05 | 7.33E-05 | -2.16168 | 9.89E-05 | 0.000527 | -1.99917 |
| OID20122 | AK1      | Cardiometabolic | -2.2553  | -1.22635 | -1.238   | 0.001549 | 0.004109 | 2.038559 | 0.008574 | 0.020031 | 2.008544 |
| OID20123 | ANXA4    | Cardiometabolic | -1.37655 | -0.12485 | -0.4641  | 0.000545 | 0.001739 | 2.481393 | 0.015035 | 0.031626 | 2.120199 |
| OID20125 | NTproBNP | Cardiometabolic | 1.8125   | 0.76945  | 1.0228   | 0.001989 | 0.005068 | -1.56901 | 0.018138 | 0.036788 | -1.44683 |
| OID20126 | CLC      | Cardiometabolic | -3.16675 | -2.9296  | -3.2115  | 0.248412 | 0.318166 | 1.170358 | 0.730422 | 0.784739 | -1.07777 |
| OID20128 | LEPR     | Cardiometabolic | -3.1867  | -2.6109  | -2.68665 | 0.193925 | 0.259038 | 1.229609 | 0.125495 | 0.184958 | 1.094901 |

|          |         |                 |          |          |          |          |          |          |          |          |          |
|----------|---------|-----------------|----------|----------|----------|----------|----------|----------|----------|----------|----------|
| OID20129 | TSHB    | Cardiometabolic | -5.669   | -5.21285 | -5.105   | 0.000251 | 0.000893 | 1.590411 | 0.000237 | 0.001093 | 1.469372 |
| OID20130 | S100A11 | Cardiometabolic | -2.29    | -0.0738  | -0.68395 | 8.89E-05 | 0.000374 | 4.912645 | 0.001475 | 0.004688 | 3.088701 |
| OID20131 | VSIR    | Cardiometabolic | -0.04725 | 0.26275  | 0.31925  | 0.005195 | 0.011571 | 1.280139 | 0.006024 | 0.015067 | 1.437837 |
| OID20132 | PCDH17  | Cardiometabolic | 1.27935  | 0.2328   | 0.3165   | 1.39E-05 | 8.81E-05 | -2.01587 | 5.21E-05 | 0.000325 | -1.86361 |
| OID20133 | PDGFRA  | Cardiometabolic | 0.56085  | 0.22525  | 0.27535  | 0.001297 | 0.003534 | -1.19943 | 0.002507 | 0.007207 | -1.20535 |
| OID20135 | SNX9    | Cardiometabolic | -0.57915 | 0.00715  | -0.00525 | 0.001569 | 0.004142 | 1.368552 | 0.001105 | 0.003674 | 1.194287 |
| OID20136 | NTRK2   | Cardiometabolic | 1.21735  | 1.01155  | 0.89265  | 0.047412 | 0.077237 | -1.26326 | 0.011835 | 0.026253 | -1.10799 |
| OID20137 | ACY1    | Cardiometabolic | -2.8143  | -1.823   | -1.84175 | 0.000805 | 0.002409 | 2.083848 | 0.000392 | 0.001658 | 2.103658 |
| OID20141 | TGM2    | Cardiometabolic | -1.0627  | 0.7811   | 0.84285  | 0.000306 | 0.001036 | 2.927055 | 5.01E-05 | 0.000314 | 3.092021 |
| OID20142 | DPP7    | Cardiometabolic | 5.86985  | 6.48365  | 6.42375  | 0.005653 | 0.01244  | 1.649753 | 0.014669 | 0.030924 | 1.56401  |
| OID20143 | PLIN3   | Cardiometabolic | -1.98465 | -1.7095  | -1.83605 | 0.009231 | 0.018946 | 1.054128 | 0.120815 | 0.179264 | 1.104735 |
| OID20144 | PLPBP   | Cardiometabolic | -1.0848  | 0.40165  | 0.3852   | 3.78E-05 | 0.000183 | 2.543385 | 0.000447 | 0.001825 | 2.427296 |
| OID20145 | ICAM5   | Cardiometabolic | 1.7618   | 0.52035  | 0.45805  | 1.72E-07 | 5.23E-06 | -2.24078 | 5.76E-08 | 3.95E-06 | -2.29779 |
| OID20146 | PRKAR1A | Cardiometabolic | -2.96105 | -2.95575 | -2.8304  | 0.312642 | 0.385036 | 1.215669 | 0.40239  | 0.480421 | 1.095052 |
| OID20147 | IL6ST   | Cardiometabolic | 1.48325  | 0.9458   | 1.07105  | 0.099585 | 0.14677  | -1.41819 | 0.030475 | 0.055291 | -1.31148 |
| OID20148 | DCTPP1  | Cardiometabolic | -1.65735 | -0.90335 | -1.21105 | 0.007399 | 0.015776 | 1.686462 | 0.067658 | 0.108794 | 1.200762 |

|          |          |                 |          |          |          |          |          |          |          |          |          |
|----------|----------|-----------------|----------|----------|----------|----------|----------|----------|----------|----------|----------|
| OID20149 | PM20D1   | Cardiometabolic | -8.24105 | -8.01325 | -7.4456  | 0.218658 | 0.286158 | 1.268655 | 0.46836  | 0.545922 | 1.543173 |
| OID20150 | LACTB2   | Cardiometabolic | 0.17515  | 0.7917   | 0.7566   | 0.0002   | 0.000736 | 1.467235 | 0.000633 | 0.002405 | 1.388763 |
| OID20151 | FADD     | Cardiometabolic | -2.76225 | -1.87765 | -2.5281  | 0.001776 | 0.004578 | 1.672087 | 0.062591 | 0.102441 | 1.149973 |
| OID20152 | CGREF1   | Cardiometabolic | 2.18595  | 1.45285  | 1.69525  | 7.4E-07  | 1.27E-05 | -1.56694 | 1E-05    | 0.000103 | -1.37307 |
| OID20153 | CXCL8    | Cardiometabolic | 3.38195  | 3.91985  | 3.94815  | 0.006349 | 0.013696 | 1.556764 | 0.003856 | 0.010301 | 1.284494 |
| OID20154 | LGALS1   | Cardiometabolic | -0.71165 | -1.6252  | -1.6674  | 0.001638 | 0.004282 | -2.3818  | 0.013712 | 0.029463 | -1.87664 |
| OID20155 | IGFBPL1  | Cardiometabolic | 3.5638   | 3.0512   | 2.85285  | 9.9E-05  | 0.000406 | -1.65565 | 0.003013 | 0.008419 | -1.35613 |
| OID20156 | MNDA     | Cardiometabolic | -2.66915 | -2.50195 | -2.37805 | 0.433257 | 0.506081 | 1.094977 | 0.583001 | 0.649884 | 1.039976 |
| OID20157 | CDH6     | Cardiometabolic | -0.1631  | -0.4946  | -0.3536  | 0.018362 | 0.034641 | -1.26177 | 0.092584 | 0.142178 | -1.12276 |
| OID20158 | IL19     | Cardiometabolic | -0.1562  | -0.19465 | -0.1844  | 0.176686 | 0.239822 | -1.00744 | 0.217306 | 0.288864 | 1.048953 |
| OID20159 | ACAN     | Cardiometabolic | -2.59115 | -1.9935  | -2.3634  | 0.029255 | 0.051149 | 1.365662 | 0.995493 | 0.998161 | -1.13002 |
| OID20160 | PLXNB3   | Cardiometabolic | 1.84295  | 0.8225   | 0.81085  | 3.2E-10  | 1.43E-07 | -1.96319 | 3.25E-10 | 1.19E-07 | -2.14013 |
| OID20161 | TYRO3    | Cardiometabolic | -1.26035 | -1.2746  | -1.3705  | 0.5117   | 0.584648 | 1.066068 | 0.062696 | 0.102441 | -1.14425 |
| OID20162 | EIF4EBP1 | Cardiometabolic | -0.76635 | -0.78745 | -0.94565 | 0.341831 | 0.41473  | 1.094825 | 0.896842 | 0.922034 | -1.13233 |
| OID20163 | PDCD6    | Cardiometabolic | -4.783   | -3.80755 | -4.3597  | 0.001484 | 0.003957 | 2.100816 | 0.027119 | 0.050298 | 1.241126 |
| OID20164 | APLP1    | Cardiometabolic | 4.003    | 5.06305  | 5.03255  | 1.12E-05 | 7.4E-05  | 2.365426 | 1.41E-05 | 0.000124 | 2.320764 |

|          |         |                 |          |          |          |          |          |          |          |          |          |
|----------|---------|-----------------|----------|----------|----------|----------|----------|----------|----------|----------|----------|
| OID20165 | CLEC5A  | Cardiometabolic | 4.1414   | 4.2438   | 3.93915  | 0.230096 | 0.297229 | -1.02229 | 0.046816 | 0.079573 | -1.02758 |
| OID20166 | GSTA1   | Cardiometabolic | -5.7216  | -4.5786  | -4.12235 | 0.02851  | 0.050247 | 2.556642 | 0.012221 | 0.027054 | 4.640724 |
| OID20167 | IGSF8   | Cardiometabolic | 1.89505  | 1.06695  | 1.08975  | 2.01E-08 | 1.22E-06 | -1.77547 | 2.65E-07 | 1.04E-05 | -1.83668 |
| OID20168 | MEP1B   | Cardiometabolic | -4.5822  | -4.0754  | -3.8825  | 0.034494 | 0.059087 | 1.621411 | 0.021594 | 0.042339 | 1.523247 |
| OID20169 | SDC1    | Cardiometabolic | -0.28695 | 0.1186   | -0.154   | 0.042201 | 0.069996 | 1.098055 | 0.033553 | 0.059905 | 1.123928 |
| OID20170 | CDH2    | Cardiometabolic | 0.88435  | 0.31835  | 0.28     | 0.000701 | 0.002115 | -1.39605 | 0.000534 | 0.002139 | -1.50139 |
| OID20171 | MCFD2   | Cardiometabolic | 3.4476   | 4.09325  | 4.11955  | 0.000208 | 0.000757 | 1.597759 | 0.000303 | 0.001358 | 1.666822 |
| OID20172 | FCRL1   | Cardiometabolic | -5.1429  | -5.31905 | -5.39315 | 0.395066 | 0.46997  | -1.01329 | 0.859014 | 0.892334 | 1.023067 |
| OID20173 | GPNMB   | Cardiometabolic | 0.0788   | 0.20515  | 0.32305  | 0.519993 | 0.592775 | 1.11238  | 0.158233 | 0.221607 | 1.116358 |
| OID20174 | QDPR    | Cardiometabolic | 0.13935  | 1.3201   | 1.35325  | 3.6E-07  | 8.24E-06 | 1.899013 | 1.72E-06 | 3.1E-05  | 1.976845 |
| OID20175 | GHRL    | Cardiometabolic | -0.94295 | -0.18935 | -0.3302  | 0.001144 | 0.003172 | 1.591128 | 0.001552 | 0.004883 | 1.622592 |
| OID20176 | PPP1R2  | Cardiometabolic | -1.054   | -0.49275 | -0.69925 | 0.001052 | 0.002999 | 1.614682 | 0.121569 | 0.180138 | 1.302154 |
| OID20177 | CD2AP   | Cardiometabolic | -3.4592  | -2.68985 | -2.78585 | 0.007775 | 0.016448 | 1.43485  | 0.048531 | 0.082107 | 1.273104 |
| OID20178 | NADK    | Cardiometabolic | -2.28855 | -2.34755 | -2.56565 | 0.749563 | 0.79697  | -1.13237 | 0.781885 | 0.827878 | -1.20849 |
| OID20179 | CBLIF   | Cardiometabolic | -3.0387  | -3.48665 | -3.00365 | 0.021337 | 0.039375 | -1.29258 | 0.511294 | 0.581763 | 1.02172  |
| OID20180 | TINAGL1 | Cardiometabolic | 0.7727   | -0.4218  | -0.4995  | 3.47E-05 | 0.00017  | -2.12505 | 7.06E-05 | 0.000414 | -2.05359 |

|          |         |                 |          |          |          |          |          |          |          |          |          |
|----------|---------|-----------------|----------|----------|----------|----------|----------|----------|----------|----------|----------|
| OID20181 | CANT1   | Cardiometabolic | 2.29415  | 2.4346   | 2.4095   | 0.724579 | 0.777322 | 1.148101 | 0.909878 | 0.930211 | 1.169507 |
| OID20182 | SSC4D   | Cardiometabolic | -6.1452  | -6.3659  | -6.43165 | 0.030145 | 0.052372 | -1.5837  | 0.103982 | 0.15748  | -1.35952 |
| OID20183 | OLR1    | Cardiometabolic | 3.59345  | 2.7049   | 2.62965  | 2.34E-05 | 0.000128 | -1.9908  | 9.15E-05 | 0.000503 | -1.71814 |
| OID20184 | DIABLO  | Cardiometabolic | -0.80575 | -0.94675 | -1.28865 | 0.346535 | 0.41951  | 1.184066 | 0.377619 | 0.457008 | -1.01424 |
| OID20185 | LRP11   | Cardiometabolic | 3.3297   | 0.76465  | 1.12215  | 1.37E-07 | 5E-06    | -6.05993 | 1.4E-07  | 6.98E-06 | -4.24775 |
| OID20186 | SEMA3F  | Cardiometabolic | 3.56895  | 1.3303   | 1.7964   | 5.93E-06 | 4.89E-05 | -4.54837 | 2.28E-05 | 0.000176 | -2.79607 |
| OID20187 | LEP     | Cardiometabolic | -2.93065 | -4.62285 | -3.94635 | 0.025866 | 0.046331 | -2.36117 | 0.1159   | 0.173376 | -1.70303 |
| OID20188 | LPL     | Cardiometabolic | 0.85185  | 0.17235  | 0.0743   | 4.3E-06  | 4.03E-05 | -1.72979 | 2.33E-06 | 3.69E-05 | -1.73333 |
| OID20189 | ADGRG2  | Cardiometabolic | -3.75865 | -3.7664  | -3.83005 | 0.383682 | 0.459414 | -1.18933 | 0.609186 | 0.672924 | -1.20953 |
| OID20190 | SIGLEC7 | Cardiometabolic | -2.0063  | -1.9577  | -1.95845 | 0.510522 | 0.58391  | -1.05398 | 0.370019 | 0.450396 | 1.063264 |
| OID20191 | NPTXR   | Cardiometabolic | 3.74155  | 2.70535  | 2.6873   | 1.57E-09 | 2.47E-07 | -2.14154 | 3.25E-09 | 5.94E-07 | -2.09043 |
| OID20192 | GRAP2   | Cardiometabolic | -3.2926  | -2.54345 | -2.48315 | 0.003772 | 0.008756 | 1.927526 | 0.00057  | 0.002253 | 2.043015 |
| OID20193 | CDHR5   | Cardiometabolic | -3.57525 | -3.66525 | -3.60865 | 0.219088 | 0.286379 | -1.02772 | 0.42665  | 0.503182 | -1.00832 |
| OID20194 | THOP1   | Cardiometabolic | -2.94885 | -1.71435 | -1.99255 | 6.19E-06 | 4.99E-05 | 2.038418 | 0.000396 | 0.001664 | 1.918129 |
| OID20195 | GLRX    | Cardiometabolic | -1.72025 | -1.06705 | -1.44465 | 0.078607 | 0.119213 | 1.214279 | 0.903943 | 0.925004 | 1.178458 |
| OID20196 | KITLG   | Cardiometabolic | -2.8937  | -3.0282  | -2.9451  | 0.036267 | 0.061452 | -1.10792 | 0.489795 | 0.564767 | -1.02815 |



|          |         |                 |          |          |          |          |          |          |          |          |          |
|----------|---------|-----------------|----------|----------|----------|----------|----------|----------|----------|----------|----------|
| OID20197 | PILRB   | Cardiometabolic | 0.33415  | -0.02375 | 0.12695  | 0.355223 | 0.428609 | -1.10539 | 0.419489 | 0.497407 | -1.03422 |
| OID20198 | CLUL1   | Cardiometabolic | 4.59345  | 4.8567   | 5.0734   | 0.552572 | 0.622281 | 1.229695 | 0.120682 | 0.179264 | 1.295402 |
| OID20199 | AHCY    | Cardiometabolic | -0.426   | 0.90675  | 0.2838   | 0.001024 | 0.002927 | 2.038771 | 0.126807 | 0.186142 | 1.403569 |
| OID20200 | FABP2   | Cardiometabolic | -0.9443  | -0.85315 | -0.7279  | 0.205442 | 0.272763 | 1.250019 | 0.028035 | 0.051734 | 1.18173  |
| OID20201 | REN     | Cardiometabolic | 0.5535   | -1.17985 | -0.6777  | 1.81E-07 | 5.23E-06 | -2.65222 | 3.11E-06 | 4.51E-05 | -2.36379 |
| OID20203 | RNASE3  | Cardiometabolic | -1.9556  | -2.5395  | -2.68575 | 0.063104 | 0.098561 | -2.37957 | 0.07962  | 0.12489  | -2.04798 |
| OID20204 | SOST    | Cardiometabolic | -3.44365 | -3.5435  | -3.44765 | 0.148035 | 0.20575  | -1.1839  | 0.372902 | 0.452927 | -1.00814 |
| OID20205 | NPDC1   | Cardiometabolic | 4.5501   | 2.7494   | 3.297    | 1.27E-05 | 8.15E-05 | -2.61607 | 2.23E-05 | 0.000173 | -2.2801  |
| OID20206 | CD69    | Cardiometabolic | -1.5072  | -1.65515 | -1.26495 | 0.605749 | 0.669801 | -1.05727 | 0.138952 | 0.199698 | 1.048589 |
| OID20207 | CXCL5   | Cardiometabolic | -3.9409  | -4.9733  | -4.57425 | 0.050352 | 0.080684 | -1.82887 | 0.172077 | 0.238863 | -1.68553 |
| OID20208 | COL4A1  | Cardiometabolic | 3.47175  | 2.7372   | 2.7165   | 0.001942 | 0.004958 | -1.55925 | 0.017789 | 0.036305 | -1.2781  |
| OID20209 | LILRA5  | Cardiometabolic | -4.69675 | -4.42045 | -4.38715 | 0.067847 | 0.104923 | 1.191848 | 0.135909 | 0.196871 | 1.169588 |
| OID20210 | MARCO   | Cardiometabolic | -4.24165 | -4.77005 | -4.6274  | 0.078766 | 0.11929  | -1.82456 | 0.510927 | 0.581763 | -1.63768 |
| OID20211 | ANGPTL1 | Cardiometabolic | 3.50645  | 2.214    | 2.61545  | 6.38E-09 | 6.37E-07 | -2.25566 | 9.61E-07 | 2.31E-05 | -1.89993 |
| OID20212 | PRSS27  | Cardiometabolic | 1.0384   | 0.41855  | 0.36085  | 0.000208 | 0.000757 | -1.53214 | 0.000816 | 0.002871 | -1.40342 |
| OID20213 | SORT1   | Cardiometabolic | 2.04395  | 1.39905  | 1.44935  | 8.07E-07 | 1.28E-05 | -1.65353 | 8.45E-06 | 9.28E-05 | -1.44944 |

|          |           |                 |          |          |          |          |          |          |          |          |          |
|----------|-----------|-----------------|----------|----------|----------|----------|----------|----------|----------|----------|----------|
| OID20214 | SFTPD     | Cardiometabolic | -1.1441  | -2.569   | -2.49815 | 0.000138 | 0.00054  | -2.68263 | 0.000423 | 0.001758 | -2.78813 |
| OID20215 | DDC       | Cardiometabolic | -5.152   | -3.9713  | -3.98625 | 0.000565 | 0.001793 | 1.630201 | 9.34E-05 | 0.000508 | 2.240313 |
| OID20216 | SDC4      | Cardiometabolic | 1.63005  | 1.39635  | 1.4247   | 0.013959 | 0.027176 | -1.12674 | 0.023816 | 0.045716 | -1.03987 |
| OID20217 | HMOX1     | Cardiometabolic | -6.9408  | -6.25045 | -5.88375 | 0.473461 | 0.549066 | 1.133277 | 0.237942 | 0.311407 | 1.483598 |
| OID20218 | SNAP23    | Cardiometabolic | -4.7926  | -4.2628  | -4.5595  | 0.771979 | 0.817389 | 1.534587 | 0.327861 | 0.411419 | -1.25536 |
| OID20219 | SERPINA12 | Cardiometabolic | -6.6406  | -5.7151  | -5.7247  | 0.022797 | 0.041443 | 1.767794 | 0.19098  | 0.260168 | 1.847277 |
| OID20220 | GH1       | Cardiometabolic | -4.54605 | -4.58155 | -4.46655 | 0.044469 | 0.073203 | 1.115121 | 0.000808 | 0.002852 | 1.130687 |
| OID20221 | SPON2     | Cardiometabolic | 0.2515   | 0.00045  | 0.1079   | 0.021331 | 0.039375 | -1.16724 | 0.482663 | 0.559624 | -1.03893 |
| OID20222 | NECTIN2   | Cardiometabolic | 0.77875  | -0.07335 | -0.0166  | 2.53E-07 | 6.76E-06 | -1.80513 | 2.56E-06 | 3.93E-05 | -1.63972 |
| OID20223 | CHRD2     | Cardiometabolic | -3.5096  | -3.96675 | -3.9748  | 0.077898 | 0.118453 | -1.33025 | 0.059381 | 0.09819  | -1.53034 |
| OID20224 | ROR1      | Cardiometabolic | 0.68485  | -0.29055 | -0.1956  | 4.37E-09 | 4.92E-07 | -2.08276 | 3.51E-08 | 3.21E-06 | -2.11462 |
| OID20225 | CA13      | Cardiometabolic | -2.69135 | 0.08815  | -0.26555 | 2.16E-07 | 5.93E-06 | 6.191762 | 9.29E-06 | 9.9E-05  | 4.367931 |
| OID20226 | CCDC80    | Cardiometabolic | 2.50775  | 1.16525  | 1.237    | 1.18E-06 | 1.64E-05 | -2.43066 | 1.08E-06 | 2.38E-05 | -2.46229 |
| OID20227 | FBP1      | Cardiometabolic | -2.22705 | -2.4194  | -2.6548  | 0.736224 | 0.785591 | -1.21394 | 0.212316 | 0.284296 | -1.55251 |
| OID20228 | CTSL      | Cardiometabolic | 2.95515  | 2.5135   | 2.46795  | 0.000303 | 0.001036 | -1.33219 | 0.002176 | 0.00637  | -1.36183 |
| OID20229 | NRCAM     | Cardiometabolic | 3.3738   | 3.8806   | 3.89905  | 0.001061 | 0.003017 | 1.659157 | 0.003593 | 0.009764 | 1.606143 |

|          |        |                 |          |          |          |          |          |          |          |          |          |
|----------|--------|-----------------|----------|----------|----------|----------|----------|----------|----------|----------|----------|
| OID20230 | HSPB1  | Cardiometabolic | -2.09035 | -0.11085 | 0.68015  | 0.001015 | 0.002926 | 4.398769 | 0.000633 | 0.002405 | 7.269973 |
| OID20231 | THBD   | Cardiometabolic | -3.20575 | -2.9078  | -2.87535 | 0.026442 | 0.047195 | 1.294684 | 0.063883 | 0.10407  | 1.206979 |
| OID20232 | KYAT1  | Cardiometabolic | 1.96955  | 2.4123   | 2.34545  | 0.00461  | 0.010414 | 1.303689 | 0.070868 | 0.112772 | 1.255707 |
| OID20233 | FAM3C  | Cardiometabolic | 2.8006   | 3.94735  | 3.84425  | 2.89E-05 | 0.000149 | 2.261845 | 8.1E-05  | 0.000463 | 2.353487 |
| OID20234 | TYMP   | Cardiometabolic | -3.15685 | -3.39935 | -2.7864  | 0.792136 | 0.833109 | -1.32846 | 0.544896 | 0.615531 | 1.061902 |
| OID20235 | PCSK9  | Cardiometabolic | -2.3093  | -2.6694  | -2.80075 | 0.003069 | 0.007295 | -1.47116 | 0.156336 | 0.220157 | -1.37302 |
| OID20236 | IGFBP7 | Cardiometabolic | 4.0016   | 5.22055  | 5.2207   | 3.4E-06  | 3.44E-05 | 2.710859 | 1.78E-05 | 0.000147 | 2.671963 |
| OID20237 | UMOD   | Cardiometabolic | -3.15355 | -2.47715 | -2.2766  | 0.003855 | 0.008911 | 1.237304 | 0.002813 | 0.007919 | 1.270767 |
| OID20238 | PLTP   | Cardiometabolic | 1.58075  | -0.1272  | 0.44095  | 1.53E-06 | 1.95E-05 | -2.69213 | 5.58E-05 | 0.000342 | -2.38692 |
| OID20239 | MFAP5  | Cardiometabolic | -0.7269  | -3.6572  | -3.0168  | 1.37E-08 | 1.16E-06 | -5.44696 | 3.15E-07 | 1.15E-05 | -5.17515 |
| OID20240 | LDLR   | Cardiometabolic | 2.7833   | 2.78925  | 2.537    | 0.685529 | 0.741587 | 1.009541 | 0.339675 | 0.420952 | -1.00333 |
| OID20241 | CA4    | Cardiometabolic | 2.6614   | 3.21545  | 3.14445  | 0.047017 | 0.076708 | 1.274075 | 0.011614 | 0.025866 | 1.6905   |
| OID20242 | EPHB4  | Cardiometabolic | 2.0822   | 1.48205  | 1.52     | 5.82E-05 | 0.000261 | -1.4651  | 0.00031  | 0.001369 | -1.47406 |
| OID20243 | CDH5   | Cardiometabolic | -1.48885 | -0.75575 | -0.9611  | 0.243043 | 0.311754 | 1.079902 | 0.03982  | 0.069181 | 1.261246 |
| OID20244 | CES1   | Cardiometabolic | -1.3593  | -1.1135  | -1.0188  | 0.192244 | 0.257419 | 1.079827 | 0.122752 | 0.181647 | 1.181607 |
| OID20245 | FABP4  | Cardiometabolic | 2.274    | 2.45905  | 2.4952   | 0.038948 | 0.065091 | 1.25462  | 0.009089 | 0.020965 | 1.302876 |

|          |          |                 |          |          |          |          |          |          |          |          |          |
|----------|----------|-----------------|----------|----------|----------|----------|----------|----------|----------|----------|----------|
| OID20246 | IGFBP1   | Cardiometabolic | 1.68785  | 1.014    | 1.4168   | 0.029773 | 0.051891 | -1.36254 | 0.233802 | 0.307442 | -1.03764 |
| OID20247 | PLAT     | Cardiometabolic | 3.1782   | 1.43575  | 1.9779   | 4.56E-06 | 4.07E-05 | -2.26475 | 0.000235 | 0.00109  | -1.94181 |
| OID20248 | ICAM2    | Cardiometabolic | -0.0621  | -0.46795 | -0.241   | 0.000152 | 0.000582 | -1.31098 | 0.003229 | 0.008886 | -1.16874 |
| OID20249 | ADAMTS13 | Cardiometabolic | -3.3364  | -3.7605  | -3.1314  | 0.005753 | 0.012584 | -1.19478 | 0.177871 | 0.246282 | -1.05651 |
| OID20250 | IL1RL1   | Cardiometabolic | -0.39395 | 1.0682   | -0.1772  | 0.002096 | 0.005302 | 1.925789 | 0.732871 | 0.785832 | 1.002394 |
| OID20251 | GDF15    | Cardiometabolic | 4.69195  | 4.8067   | 4.76265  | 0.819809 | 0.855656 | -1.10114 | 0.198086 | 0.267855 | 1.065847 |
| OID20252 | PLA2G1B  | Cardiometabolic | 1.24045  | 1.9389   | 2.10095  | 4.45E-05 | 0.000208 | 1.628507 | 4.01E-06 | 5.37E-05 | 1.679638 |
| OID20253 | NOTCH3   | Cardiometabolic | 0.61975  | -0.74135 | -0.6802  | 8.65E-07 | 1.32E-05 | -2.87607 | 4.42E-06 | 5.58E-05 | -2.85067 |
| OID20254 | LTBP2    | Cardiometabolic | 6.80505  | 7.12925  | 7.2111   | 0.001406 | 0.003794 | 1.250756 | 0.001918 | 0.005802 | 1.432564 |
| OID20255 | TGFBR3   | Cardiometabolic | 1.80595  | -0.7745  | -0.2838  | 1.17E-07 | 4.46E-06 | -4.21768 | 8.54E-07 | 2.18E-05 | -4.36748 |
| OID20256 | VWF      | Cardiometabolic | -4.1984  | -3.6864  | -3.72785 | 0.030078 | 0.052339 | 1.535225 | 0.091658 | 0.141151 | 1.347934 |
| OID20257 | PEAR1    | Cardiometabolic | -1.25715 | -0.89795 | -1.15795 | 0.119236 | 0.170915 | 1.102975 | 0.206742 | 0.277849 | 1.147266 |
| OID20258 | REG3A    | Cardiometabolic | 2.63135  | 3.49675  | 3.30875  | 7.53E-06 | 5.62E-05 | 2.016915 | 6.41E-05 | 0.000378 | 1.800004 |
| OID20259 | XG       | Cardiometabolic | 2.75805  | 2.65135  | 2.87225  | 0.240941 | 0.309781 | -1.08249 | 0.847698 | 0.881621 | 1.043333 |
| OID20260 | ADGRE5   | Cardiometabolic | -1.20455 | -1.3424  | -0.9891  | 0.01363  | 0.026869 | -1.10026 | 0.555386 | 0.62481  | 1.036629 |
| OID20261 | FUCA1    | Cardiometabolic | 3.29205  | 3.5481   | 3.54775  | 0.931647 | 0.94281  | 1.129865 | 0.34021  | 0.421139 | 1.091642 |

|          |           |                 |         |          |         |          |          |          |          |          |          |
|----------|-----------|-----------------|---------|----------|---------|----------|----------|----------|----------|----------|----------|
| OID20262 | CD209     | Cardiometabolic | -0.6036 | -1.49155 | -1.1973 | 0.003078 | 0.0073   | -2.01342 | 0.144998 | 0.206496 | -1.48468 |
| OID20263 | MB        | Cardiometabolic | 0.43045 | 2.52225  | 2.54785 | 6.47E-05 | 0.000285 | 4.262796 | 8.82E-06 | 9.59E-05 | 3.880386 |
| OID20264 | DKK3      | Cardiometabolic | 2.52515 | 5.05065  | 4.90655 | 1.6E-07  | 5.23E-06 | 5.2014   | 8.24E-07 | 2.18E-05 | 5.994336 |
| OID20265 | TNFRSF10C | Cardiometabolic | 0.33525 | 0.65665  | 0.80165 | 0.255269 | 0.325157 | 1.130491 | 0.074564 | 0.118141 | 1.163846 |
| OID20266 | REG1B     | Cardiometabolic | 1.87605 | 3.0646   | 2.64535 | 0.000941 | 0.002742 | 2.377425 | 0.005486 | 0.013943 | 1.699959 |
| OID20267 | IL2RA     | Cardiometabolic | 0.2688  | 0.54755  | 0.79155 | 0.020736 | 0.038568 | 1.342898 | 0.006616 | 0.016252 | 1.44483  |
| OID20268 | PDGFRB    | Cardiometabolic | 1.9014  | 1.9775   | 1.79855 | 0.085954 | 0.12858  | 1.008178 | 0.07779  | 0.122369 | -1.06751 |
| OID20269 | MET       | Cardiometabolic | 1.68935 | 1.2394   | 1.36215 | 0.000934 | 0.002741 | -1.27655 | 0.004743 | 0.012311 | -1.25306 |
| OID20270 | ESAM      | Cardiometabolic | 4.8443  | 4.8731   | 4.9209  | 0.343529 | 0.41633  | 1.184682 | 0.807567 | 0.847714 | 1.131158 |
| OID20271 | CA3       | Cardiometabolic | 1.63455 | 2.18615  | 2.57175 | 0.015737 | 0.030208 | 1.440181 | 0.045966 | 0.078249 | 1.654849 |
| OID20272 | TNFSF13B  | Cardiometabolic | 2.87455 | 2.7727   | 3.6339  | 0.316723 | 0.387262 | 1.181607 | 0.004079 | 0.010792 | 1.457807 |
| OID20273 | ALCAM     | Cardiometabolic | 1.47195 | 1.4711   | 1.37905 | 0.711143 | 0.766275 | -1.04012 | 0.276038 | 0.354906 | -1.01234 |
| OID20274 | PLA2G2A   | Cardiometabolic | 1.6505  | 0.4827   | 0.6526  | 0.020759 | 0.038568 | -1.6362  | 0.00253  | 0.007253 | -1.85087 |
| OID20275 | MSMB      | Cardiometabolic | 0.18025 | 0.86665  | 0.96115 | 0.000499 | 0.001617 | 1.611495 | 0.00024  | 0.001102 | 1.818438 |
| OID20276 | CTSB      | Cardiometabolic | 5.00335 | 6.03285  | 6.1357  | 1.82E-06 | 2.22E-05 | 2.203581 | 9.07E-06 | 9.76E-05 | 2.204269 |
| OID20277 | ICAM3     | Cardiometabolic | -2.3278 | -1.9546  | -1.8541 | 0.04338  | 0.071627 | 1.179397 | 0.002011 | 0.005999 | 1.461348 |

|          |               |                 |          |          |          |          |          |          |          |          |          |
|----------|---------------|-----------------|----------|----------|----------|----------|----------|----------|----------|----------|----------|
| OID20278 | DPT           | Cardiometabolic | 0.7053   | 1.15475  | 1.24785  | 0.835838 | 0.869082 | 1.275489 | 0.236252 | 0.310293 | 1.416372 |
| OID20279 | CRTAC1        | Cardiometabolic | 1.10685  | 2.5309   | 2.62045  | 1.19E-06 | 1.64E-05 | 2.683377 | 2.35E-06 | 3.69E-05 | 2.819032 |
| OID20280 | CPA1          | Cardiometabolic | 1.54865  | 1.84285  | 1.98005  | 0.104825 | 0.153056 | 1.164895 | 0.007683 | 0.01826  | 1.239407 |
| OID20281 | SERPINA1<br>1 | Cardiometabolic | -5.4898  | -5.83095 | -4.9831  | 0.146339 | 0.204037 | -1.16922 | 0.042789 | 0.073756 | 1.297019 |
| OID20282 | CXCL16        | Cardiometabolic | 4.44915  | 4.38385  | 4.5463   | 0.651942 | 0.710856 | 1.10202  | 0.605105 | 0.669763 | 1.161388 |
| OID20283 | SEMA7A        | Cardiometabolic | 4.7195   | 6.15355  | 6.1951   | 9.9E-07  | 1.45E-05 | 3.075562 | 4.37E-06 | 5.58E-05 | 3.013625 |
| OID20284 | LGALS3        | Cardiometabolic | 1.45385  | 1.77015  | 1.7039   | 0.009407 | 0.019235 | 1.253186 | 0.035684 | 0.063195 | 1.206435 |
| OID20285 | MEGF9         | Cardiometabolic | 3.3946   | 3.31065  | 3.23485  | 0.267255 | 0.338462 | -1.04395 | 0.137804 | 0.198466 | -1.01227 |
| OID20286 | CORO1A        | Cardiometabolic | -0.85915 | -0.83425 | -0.97065 | 0.707223 | 0.763551 | -1.2038  | 0.6908   | 0.748193 | -1.1303  |
| OID20287 | ENG           | Cardiometabolic | -1.2692  | -1.5162  | -1.51575 | 0.001096 | 0.003093 | -1.13895 | 0.186894 | 0.256087 | -1.04247 |
| OID20288 | ENPP2         | Cardiometabolic | 2.6436   | 3.71725  | 3.73615  | 2.33E-05 | 0.000128 | 2.31498  | 0.00011  | 0.000579 | 2.320764 |
| OID20289 | CPB1          | Cardiometabolic | 1.0698   | 1.53435  | 1.71925  | 0.003211 | 0.00755  | 1.358533 | 0.001938 | 0.005829 | 1.428598 |
| OID20290 | SELE          | Cardiometabolic | -4.4777  | -3.78825 | -3.66715 | 0.053264 | 0.084514 | 1.392522 | 0.013451 | 0.029188 | 1.306312 |
| OID20291 | PAM           | Cardiometabolic | 4.3495   | 4.78415  | 4.78325  | 0.011409 | 0.023028 | 1.18218  | 0.02045  | 0.040605 | 1.141357 |
| OID20292 | COL6A3        | Cardiometabolic | 2.67375  | 3.11405  | 2.9665   | 0.000831 | 0.002473 | 1.357592 | 0.000851 | 0.002966 | 1.573525 |
| OID20293 | CST6          | Cardiometabolic | 2.91135  | 3.1997   | 3.25475  | 0.895037 | 0.916255 | 1.023173 | 0.33802  | 0.419646 | 1.18896  |

|          |         |                 |          |          |          |          |          |          |          |          |          |
|----------|---------|-----------------|----------|----------|----------|----------|----------|----------|----------|----------|----------|
| OID20294 | CSTB    | Cardiometabolic | 3.32     | 4.0211   | 3.7827   | 4.85E-06 | 4.3E-05  | 1.592618 | 6.41E-05 | 0.000378 | 1.377068 |
| OID20295 | DLK1    | Cardiometabolic | 0.8631   | 0.84865  | 0.9718   | 0.1767   | 0.239822 | -1.04837 | 0.717095 | 0.771932 | 1.065182 |
| OID20296 | GUSB    | Cardiometabolic | 5.6087   | 5.3186   | 5.2858   | 0.026477 | 0.047195 | -1.22226 | 0.013536 | 0.029314 | -1.17862 |
| OID20297 | SCARF1  | Cardiometabolic | 1.6098   | 1.92835  | 1.77845  | 0.188427 | 0.253235 | 1.143733 | 0.066504 | 0.107543 | 1.064296 |
| OID20298 | CELA3A  | Cardiometabolic | -1.5249  | -2.0275  | -1.6309  | 0.168843 | 0.231159 | -1.16748 | 0.93342  | 0.949856 | -1.0601  |
| OID20299 | CCN3    | Cardiometabolic | 4.23515  | 4.0769   | 4.20215  | 0.270109 | 0.341288 | -1.00542 | 0.998161 | 0.998161 | 1.06135  |
| OID20300 | HYOU1   | Cardiometabolic | 1.3782   | 0.9525   | 1.18695  | 0.009958 | 0.020249 | -1.35637 | 0.04412  | 0.075812 | -1.1928  |
| OID20301 | LILRB2  | Cardiometabolic | -0.2512  | 0.10315  | 0.07985  | 0.410452 | 0.483558 | 1.089563 | 0.067674 | 0.108794 | 1.14671  |
| OID20302 | ST6GAL1 | Cardiometabolic | 0.02665  | -0.9458  | -0.80685 | 0.000184 | 0.000688 | -1.94544 | 0.030886 | 0.055869 | -1.62282 |
| OID20303 | TIE1    | Cardiometabolic | 0.63035  | -0.14555 | 0.0171   | 0.149052 | 0.206902 | -1.54601 | 0.379908 | 0.458899 | -1.35933 |
| OID20304 | SIRPA   | Cardiometabolic | 4.29015  | 4.44435  | 4.3552   | 0.036998 | 0.062499 | 1.272089 | 0.085198 | 0.133259 | 1.163927 |
| OID20305 | CASP3   | Cardiometabolic | 0.0874   | 2.3034   | 1.5338   | 2.35E-05 | 0.000128 | 5.025266 | 0.002343 | 0.006824 | 2.382457 |
| OID20306 | PTPRS   | Cardiometabolic | 3.621    | 3.83375  | 3.91315  | 0.008162 | 0.017167 | 1.258975 | 0.030155 | 0.054909 | 1.31768  |
| OID20307 | CNTN1   | Cardiometabolic | 4.12805  | 4.63045  | 4.57595  | 0.000941 | 0.002742 | 1.463325 | 0.004579 | 0.011942 | 1.697839 |
| OID20308 | BPIFB1  | Cardiometabolic | -6.09785 | -6.52765 | -6.14955 | 0.397412 | 0.471739 | -1.16429 | 0.491281 | 0.56505  | -1.12748 |
| OID20309 | AZU1    | Cardiometabolic | -2.08095 | -2.24835 | -1.7782  | 0.11121  | 0.16067  | -1.53938 | 0.137914 | 0.198466 | 1.041707 |

|          |         |                 |          |          |         |          |          |          |          |          |          |
|----------|---------|-----------------|----------|----------|---------|----------|----------|----------|----------|----------|----------|
| OID20310 | PTPRF   | Cardiometabolic | 2.50195  | 1.44795  | 1.5452  | 6.82E-06 | 5.24E-05 | -1.73466 | 4.63E-05 | 0.000301 | -1.84421 |
| OID20311 | NOTCH1  | Cardiometabolic | 2.45315  | 1.8254   | 1.63455 | 1.35E-06 | 1.81E-05 | -1.49138 | 6.63E-07 | 1.87E-05 | -1.62721 |
| OID20312 | CHIT1   | Cardiometabolic | 4.23445  | 4.48805  | 4.34625 | 0.895393 | 0.916255 | 1.058008 | 0.025335 | 0.04788  | 1.481029 |
| OID20313 | PDGFA   | Cardiometabolic | 3.8659   | 4.0654   | 3.85875 | 0.100537 | 0.147777 | 1.222937 | 0.115849 | 0.173376 | 1.165258 |
| OID20314 | ACP5    | Cardiometabolic | 3.6625   | 3.34575  | 3.57835 | 0.314263 | 0.386406 | -1.0072  | 0.677001 | 0.735761 | 1.13418  |
| OID20315 | ITGB2   | Cardiometabolic | 0.2248   | 0.20575  | 0.04365 | 0.477775 | 0.553373 | 1.032184 | 0.076611 | 0.120687 | -1.20752 |
| OID20316 | FAS     | Cardiometabolic | 2.89215  | 2.40435  | 2.55555 | 0.077998 | 0.118453 | -1.24561 | 0.126097 | 0.185595 | -1.30297 |
| OID20317 | PLXNB2  | Cardiometabolic | 3.28915  | 3.622    | 3.5219  | 0.220094 | 0.287012 | 1.09047  | 0.090721 | 0.139904 | 1.018891 |
| OID20318 | GAS6    | Cardiometabolic | 5.3767   | 5.7414   | 5.76445 | 0.007125 | 0.01525  | 1.433111 | 0.000676 | 0.002516 | 1.54601  |
| OID20319 | EGFR    | Cardiometabolic | 1.7524   | 1.55945  | 1.40215 | 0.122645 | 0.17421  | -1.13383 | 0.014673 | 0.030924 | -1.1691  |
| OID20320 | QPCT    | Cardiometabolic | 3.10815  | 4.20275  | 4.10325 | 7.79E-07 | 1.28E-05 | 2.328579 | 4.01E-06 | 5.37E-05 | 2.397283 |
| OID20321 | RNASET2 | Cardiometabolic | 4.38115  | 5.60715  | 5.57015 | 7.65E-06 | 5.64E-05 | 2.39222  | 2.99E-05 | 0.000216 | 2.501858 |
| OID20322 | SPP1    | Cardiometabolic | 0.71065  | 2.77015  | 2.60155 | 2.87E-05 | 0.000149 | 2.896378 | 0.000235 | 0.00109  | 2.868408 |
| OID20323 | LILRB1  | Cardiometabolic | 0.63945  | 0.48465  | 0.6797  | 0.408131 | 0.481858 | -1.0913  | 0.504681 | 0.575621 | 1.04652  |
| OID20324 | LILRB5  | Cardiometabolic | -1.79775 | -1.53385 | -1.4387 | 0.171592 | 0.234338 | 1.157891 | 0.001778 | 0.005467 | 1.34742  |
| OID20325 | IGFBP2  | Cardiometabolic | 2.8785   | 1.18565  | 1.58195 | 0.000174 | 0.000658 | -2.50177 | 0.000415 | 0.001731 | -1.90053 |



|          |         |                 |          |          |          |          |          |          |          |          |          |
|----------|---------|-----------------|----------|----------|----------|----------|----------|----------|----------|----------|----------|
| OID20326 | PI3     | Cardiometabolic | 1.56075  | 1.78595  | 1.8072   | 0.000937 | 0.002742 | 1.301297 | 0.000789 | 0.002821 | 1.283026 |
| OID20327 | RETN    | Cardiometabolic | 0.5314   | 0.77575  | 0.83385  | 0.040376 | 0.067172 | 1.102325 | 0.029813 | 0.054376 | 1.16163  |
| OID20328 | CCL15   | Cardiometabolic | 1.45755  | 1.14735  | 1.26115  | 0.029153 | 0.051053 | -1.28891 | 0.027474 | 0.050785 | -1.14584 |
| OID20329 | PRTN3   | Cardiometabolic | -1.51905 | -1.66505 | -1.47285 | 0.529893 | 0.601056 | -1.42939 | 0.434393 | 0.511215 | 1.043369 |
| OID20330 | FAP     | Cardiometabolic | -1.4801  | -0.8179  | -0.8314  | 0.000482 | 0.001571 | 1.357028 | 0.000556 | 0.002205 | 1.367509 |
| OID20331 | PPIB    | Cardiometabolic | 4.38555  | 5.034    | 5.02455  | 7.04E-07 | 1.25E-05 | 1.495316 | 1.1E-07  | 6.37E-06 | 1.659214 |
| OID20332 | COL18A1 | Cardiometabolic | 1.226    | 2.09425  | 2.04765  | 1.05E-05 | 7.12E-05 | 2.105116 | 1.82E-05 | 0.000149 | 2.226689 |
| OID20333 | AMY2A   | Cardiometabolic | 1.3792   | 1.3717   | 1.43715  | 0.789108 | 0.832148 | -1.06161 | 0.69779  | 0.754108 | 1.063227 |
| OID20334 | CCL16   | Cardiometabolic | 0.30785  | -0.7732  | -0.66045 | 0.000195 | 0.000725 | -2.11558 | 0.000335 | 0.001441 | -1.97178 |
| OID20335 | COL1A1  | Cardiometabolic | 0.56095  | 1.44215  | 1.42915  | 2.47E-05 | 0.000133 | 2.208627 | 0.000282 | 0.001283 | 1.812021 |
| OID20336 | BLMH    | Cardiometabolic | 0.0951   | 0.62675  | 0.4966   | 0.035602 | 0.0607   | 1.518924 | 0.325697 | 0.40964  | 1.215037 |
| OID20337 | PRCP    | Cardiometabolic | 2.91555  | 3.14345  | 3.22525  | 0.001235 | 0.00338  | 1.241471 | 0.000176 | 0.000864 | 1.322163 |
| OID20338 | PGLYRP1 | Cardiometabolic | 1.6995   | 2.06305  | 2.13615  | 0.016633 | 0.031651 | 1.16542  | 0.006509 | 0.016023 | 1.457807 |
| OID20339 | CD59    | Cardiometabolic | 2.48935  | 3.86345  | 3.81905  | 2.24E-06 | 2.59E-05 | 2.768971 | 1.58E-05 | 0.000135 | 3.045122 |
| OID20340 | AMY2B   | Cardiometabolic | 1.674    | 1.6115   | 1.51195  | 0.321238 | 0.392346 | -1.09981 | 0.271175 | 0.349882 | 1.03154  |
| OID20341 | TCN2    | Cardiometabolic | 2.79645  | 2.46025  | 3.1853   | 0.473557 | 0.549066 | 1.10784  | 0.171749 | 0.238709 | 1.258888 |

|          |              |                 |         |         |          |          |          |          |          |          |          |
|----------|--------------|-----------------|---------|---------|----------|----------|----------|----------|----------|----------|----------|
| OID20342 | SERPINE1     | Cardiometabolic | 1.5863  | 2.62275 | 2.31915  | 1.79E-05 | 0.000104 | 1.845997 | 8.66E-05 | 0.000488 | 1.536928 |
| OID20343 | MCAM         | Cardiometabolic | 5.1513  | 4.94705 | 4.89935  | 0.10038  | 0.147744 | -1.03605 | 0.023566 | 0.045317 | -1.11903 |
| OID20344 | DEFA1_DEFA1B | Cardiometabolic | 5.8592  | 5.79415 | 5.95685  | 0.110878 | 0.160401 | -1.11092 | 0.277487 | 0.356352 | 1.024592 |
| OID20345 | VASN         | Cardiometabolic | 4.565   | 4.9156  | 4.87845  | 4.46E-06 | 4.05E-05 | 1.42568  | 9.16E-05 | 0.000503 | 1.273324 |
| OID20346 | ART3         | Cardiometabolic | 3.9926  | 4.2965  | 4.2838   | 0.121179 | 0.172733 | 1.278587 | 0.087533 | 0.136134 | 1.166996 |
| OID20347 | CNDP1        | Cardiometabolic | 4.0504  | 4.71405 | 4.76585  | 0.001024 | 0.002927 | 1.471768 | 0.001242 | 0.004071 | 1.682143 |
| OID20348 | IL18BP       | Cardiometabolic | 4.83705 | 5.1006  | 5.22875  | 0.018976 | 0.0356   | 1.116087 | 0.000658 | 0.002467 | 1.303599 |
| OID20349 | F9           | Cardiometabolic | 0.4529  | 0.1619  | 0.5609   | 0.09086  | 0.134905 | -1.27514 | 0.488588 | 0.564705 | 1.166552 |
| OID20350 | ANPEP        | Cardiometabolic | 1.0734  | 1.84055 | 1.69185  | 0.000585 | 0.001839 | 1.523564 | 0.000439 | 0.00181  | 1.525255 |
| OID20351 | SSC5D        | Cardiometabolic | 2.4033  | 1.19695 | 1.6052   | 3.15E-05 | 0.000159 | -2.14712 | 0.000356 | 0.00152  | -1.65267 |
| OID20352 | ITIH3        | Cardiometabolic | 0.6621  | 1.032   | 1.0776   | 0.304431 | 0.376849 | 1.079864 | 0.33137  | 0.415348 | 1.048335 |
| OID20353 | CDH1         | Cardiometabolic | 3.8441  | 4.20005 | 4.37905  | 0.002204 | 0.005488 | 1.259324 | 0.011661 | 0.025918 | 1.192426 |
| OID20354 | NCAM1        | Cardiometabolic | 5.83545 | 6.13515 | 6.15895  | 0.001711 | 0.004433 | 1.387656 | 0.02288  | 0.044386 | 1.451053 |
| OID20355 | LBP          | Cardiometabolic | -0.2335 | -2.2774 | -1.85665 | 1.6E-05  | 9.65E-05 | -3.24013 | 0.000309 | 0.001369 | -3.08677 |
| OID20356 | OSMR         | Cardiometabolic | 3.80045 | 3.99085 | 4.01555  | 0.049212 | 0.07923  | 1.170967 | 0.014603 | 0.030894 | 1.188177 |
| OID20357 | HYAL1        | Cardiometabolic | 3.59935 | 2.02735 | 2.5792   | 1.71E-05 | 0.000101 | -2.31049 | 0.000785 | 0.002816 | -2.39214 |

|          |         |                 |         |         |         |          |          |          |          |          |          |
|----------|---------|-----------------|---------|---------|---------|----------|----------|----------|----------|----------|----------|
| OID20358 | CTSD    | Cardiometabolic | 2.88425 | 5.30915 | 5.1402  | 1.42E-06 | 1.87E-05 | 4.921336 | 1.29E-05 | 0.00012  | 5.71994  |
| OID20359 | TNC     | Cardiometabolic | 5.26285 | 3.63875 | 3.7516  | 4.48E-09 | 4.92E-07 | -2.9673  | 8.13E-08 | 5.25E-06 | -2.96339 |
| OID20360 | CD163   | Cardiometabolic | 4.20375 | 4.8824  | 4.49375 | 4.44E-05 | 0.000208 | 1.725124 | 0.149782 | 0.212756 | 1.248763 |
| OID20361 | SPARCL1 | Cardiometabolic | 4.6388  | 5.90145 | 5.93975 | 1.15E-06 | 1.64E-05 | 2.58874  | 6.06E-06 | 7.19E-05 | 2.803444 |
| OID20362 | NID1    | Cardiometabolic | 4.2103  | 3.87435 | 3.83985 | 0.00099  | 0.002861 | -1.20966 | 0.005751 | 0.014484 | -1.08478 |
| OID20363 | AXL     | Cardiometabolic | 5.4685  | 5.8894  | 5.7247  | 0.000251 | 0.000893 | 1.51803  | 0.001713 | 0.005299 | 1.449444 |
| OID20364 | PRSS2   | Cardiometabolic | 5.44125 | 5.94835 | 6.0387  | 0.012742 | 0.025485 | 1.499883 | 0.001782 | 0.005467 | 1.512987 |
| OID20365 | CTSZ    | Cardiometabolic | 5.1498  | 6.34465 | 6.27395 | 7.89E-06 | 5.72E-05 | 2.435554 | 7.26E-05 | 0.000424 | 2.439017 |
| OID20366 | CHL1    | Cardiometabolic | 4.94225 | 5.39585 | 5.46335 | 0.000505 | 0.001631 | 1.454527 | 0.002045 | 0.006069 | 1.518556 |
| OID20367 | C1QTNF1 | Cardiometabolic | 6.2567  | 4.983   | 5.3464  | 2.58E-06 | 2.83E-05 | -2.1114  | 0.000163 | 0.000811 | -1.74279 |
| OID20368 | THBS4   | Cardiometabolic | 2.4982  | 1.61675 | 1.62495 | 2.21E-06 | 2.58E-05 | -1.51645 | 1.58E-05 | 0.000135 | -1.63376 |
| OID20369 | TFRC    | Cardiometabolic | 0.2211  | 0.35925 | 0.47285 | 0.134152 | 0.188844 | 1.275842 | 0.031563 | 0.056813 | 1.309395 |
| OID20370 | KIT     | Cardiometabolic | 1.87215 | 2.1318  | 2.08775 | 0.120167 | 0.172026 | 1.181197 | 0.337316 | 0.419449 | 1.224973 |
| OID20371 | TFF3    | Cardiometabolic | 6.65475 | 7.30635 | 7.3981  | 0.003603 | 0.0084   | 1.52425  | 0.001876 | 0.00569  | 1.514561 |
| OID20372 | F7      | Cardiometabolic | 1.36295 | 1.36405 | 1.25365 | 0.027978 | 0.049628 | -1.1719  | 0.232879 | 0.306595 | -1.0357  |
| OID20373 | RARRES2 | Cardiometabolic | 5.16925 | 5.53795 | 5.55685 | 0.013885 | 0.027127 | 1.381227 | 0.021942 | 0.042946 | 1.34574  |

|          |        |                 |          |          |          |          |          |          |          |          |          |
|----------|--------|-----------------|----------|----------|----------|----------|----------|----------|----------|----------|----------|
| OID20374 | APOM   | Cardiometabolic | -0.65755 | -0.36785 | 0.3839   | 0.000512 | 0.00165  | 1.585898 | 1.04E-05 | 0.000105 | 2.063009 |
| OID20375 | TIMD4  | Cardiometabolic | -0.65525 | -0.6787  | -0.51465 | 0.048974 | 0.079078 | -1.37402 | 0.634301 | 0.695072 | -1.00933 |
| OID20376 | ITGB1  | Cardiometabolic | 1.19965  | 1.28075  | 1.2426   | 0.621273 | 0.684898 | -1.05948 | 0.459789 | 0.536502 | -1.00187 |
| OID20377 | CD55   | Cardiometabolic | 6.3024   | 6.86915  | 6.92805  | 0.00014  | 0.000543 | 1.701904 | 0.00061  | 0.002356 | 1.86995  |
| OID20378 | CD14   | Cardiometabolic | 5.59685  | 5.7712   | 5.77415  | 0.839867 | 0.872445 | -1.05041 | 0.350988 | 0.431079 | 1.062601 |
| OID20379 | SELP   | Cardiometabolic | 4.0772   | 4.3818   | 4.26325  | 0.000152 | 0.000582 | 1.667978 | 0.000822 | 0.002885 | 1.664397 |
| OID20380 | CD46   | Cardiometabolic | 7.25245  | 7.1737   | 7.12705  | 0.455167 | 0.529421 | 1.001596 | 0.134527 | 0.195644 | -1.01168 |
| OID20381 | GP1BA  | Cardiometabolic | -1.16945 | -0.2449  | -0.01785 | 0.000236 | 0.000853 | 2.012864 | 0.000207 | 0.000979 | 1.743516 |
| OID20382 | FCN2   | Cardiometabolic | -2.8608  | -1.86    | -1.8691  | 0.002828 | 0.006781 | 1.358157 | 0.001947 | 0.005829 | 1.712317 |
| OID20383 | HSPG2  | Cardiometabolic | 5.705    | 6.641    | 6.67665  | 6.56E-06 | 5.14E-05 | 1.949021 | 4.97E-05 | 0.000313 | 2.129626 |
| OID20384 | PCOLCE | Cardiometabolic | 3.7901   | 4.5169   | 4.65165  | 0.003888 | 0.00897  | 1.838017 | 0.004878 | 0.012602 | 2.055301 |
| OID20385 | IL6R   | Cardiometabolic | 2.965    | 3.269    | 3.19765  | 0.406543 | 0.481409 | -1.02076 | 0.086217 | 0.134469 | 1.118527 |
| OID20386 | SOD1   | Cardiometabolic | 3.73125  | 5.42175  | 5.3259   | 2.65E-05 | 0.000141 | 3.131057 | 0.000201 | 0.000956 | 3.113204 |
| OID20387 | FCGR3B | Cardiometabolic | 1.67225  | 2.47365  | 2.4362   | 0.000295 | 0.001019 | 1.49516  | 2.87E-05 | 0.000209 | 1.663821 |
| OID20388 | TFPI   | Cardiometabolic | 3.74955  | 2.41915  | 2.4627   | 7.11E-05 | 0.000309 | -2.28802 | 0.000117 | 0.000602 | -2.23605 |
| OID20389 | AOC3   | Cardiometabolic | 1.985    | 2.73405  | 2.67305  | 4.73E-05 | 0.000218 | 1.434452 | 6.55E-06 | 7.57E-05 | 1.595159 |

|          |        |                 |          |         |          |          |          |          |          |          |          |
|----------|--------|-----------------|----------|---------|----------|----------|----------|----------|----------|----------|----------|
| OID20390 | NRP1   | Cardiometabolic | 3.7178   | 4.15565 | 4.12915  | 0.002148 | 0.005403 | 1.409907 | 0.002469 | 0.007135 | 1.416765 |
| OID20391 | FCGR2A | Cardiometabolic | 3.4728   | 3.45195 | 3.63685  | 0.942555 | 0.951218 | 1.02445  | 0.313996 | 0.396284 | 1.076539 |
| OID20392 | LCN2   | Cardiometabolic | 4.64975  | 5.53615 | 5.53355  | 3.06E-06 | 3.23E-05 | 2.13739  | 7.73E-06 | 8.6E-05  | 2.113084 |
| OID20393 | CR2    | Cardiometabolic | -1.42455 | -1.1031 | -1.03005 | 0.562914 | 0.630693 | 1.051829 | 0.143131 | 0.204632 | 1.166835 |
| OID20394 | ADA2   | Cardiometabolic | 4.93755  | 4.95555 | 5.26325  | 0.273864 | 0.34513  | 1.062159 | 0.028155 | 0.051869 | 1.282314 |
| OID20395 | CCL18  | Cardiometabolic | 1.9845   | -0.5529 | 0.27055  | 0.000662 | 0.002029 | -3.1428  | 0.002629 | 0.007459 | -2.43142 |
| OID20396 | VCAM1  | Cardiometabolic | 2.3887   | 2.3568  | 2.6981   | 0.172114 | 0.234759 | -1.16091 | 0.306974 | 0.388763 | 1.202428 |
| OID20397 | CD93   | Cardiometabolic | 3.4242   | 3.31615 | 3.535    | 0.024077 | 0.043409 | -1.09126 | 0.422209 | 0.499016 | -1.04616 |
| OID20398 | IGFBP3 | Cardiometabolic | 1.63405  | 0.75055 | 1.1796   | 0.052747 | 0.084131 | -1.69261 | 0.069391 | 0.110904 | -1.28766 |
| OID20399 | CHI3L1 | Cardiometabolic | 5.25425  | 6.66085 | 6.76455  | 0.000108 | 0.000439 | 2.528795 | 0.000807 | 0.002852 | 2.378249 |
| OID20400 | CST3   | Cardiometabolic | -0.363   | 2.17575 | 1.90015  | 7.22E-06 | 5.47E-05 | 5.032063 | 5.34E-05 | 0.000331 | 4.868239 |
| OID20401 | CCL14  | Cardiometabolic | 5.77295  | 6.5745  | 6.58355  | 1.91E-07 | 5.38E-06 | 1.677078 | 1.97E-07 | 8.18E-06 | 1.82798  |
| OID20402 | PROC   | Cardiometabolic | 1.54985  | 0.8396  | 1.5852   | 0.028266 | 0.049897 | -1.28953 | 0.421708 | 0.498961 | 1.184066 |
| OID20403 | ANG    | Cardiometabolic | 1.4712   | 2.49175 | 2.57615  | 1.24E-05 | 8.04E-05 | 2.801598 | 8.9E-05  | 0.000499 | 2.680868 |
| OID20404 | FETUB  | Cardiometabolic | 1.8962   | 1.8226  | 2.1258   | 0.190877 | 0.256214 | -1.05019 | 0.830509 | 0.868475 | 1.054128 |
| OID20405 | COMP   | Cardiometabolic | 2.50455  | 2.99315 | 2.94815  | 0.001135 | 0.003154 | 1.319737 | 0.006357 | 0.015757 | 1.34355  |

|          |         |                 |          |         |         |          |          |          |          |          |          |
|----------|---------|-----------------|----------|---------|---------|----------|----------|----------|----------|----------|----------|
| OID20406 | DPP4    | Cardiometabolic | -0.341   | 0.7413  | 0.89215 | 0.008943 | 0.018491 | 1.383574 | 0.00262  | 0.007453 | 1.785094 |
| OID20407 | ANGPTL3 | Cardiometabolic | 2.27425  | 3.0448  | 2.9107  | 4.58E-07 | 1.01E-05 | 1.419468 | 4.71E-07 | 1.48E-05 | 1.612166 |
| OID20408 | PTGDS   | Cardiometabolic | 0.3557   | 2.10685 | 2.10855 | 2.41E-06 | 2.75E-05 | 3.152836 | 9.6E-06  | 0.0001   | 3.126178 |
| OID20409 | CA1     | Cardiometabolic | 0.62345  | 2.38135 | 1.78685 | 0.01127  | 0.022789 | 2.420408 | 0.137053 | 0.198006 | 1.500351 |
| OID20410 | C2      | Cardiometabolic | 0.67835  | 1.55205 | 1.65405 | 1.08E-06 | 1.56E-05 | 1.860126 | 4.28E-07 | 1.43E-05 | 2.005275 |
| OID20411 | ICAM1   | Cardiometabolic | 3.60225  | 3.8634  | 3.93415 | 0.125625 | 0.178212 | 1.185873 | 0.00875  | 0.020355 | 1.25867  |
| OID20412 | CCL5    | Cardiometabolic | -4.03585 | -2.8665 | -2.8601 | 0.001129 | 0.003147 | 2.015866 | 0.001688 | 0.005237 | 2.408859 |
| OID20413 | IGFBP6  | Cardiometabolic | 4.5702   | 6.02715 | 5.85675 | 5.89E-06 | 4.89E-05 | 2.937421 | 4.69E-05 | 0.000303 | 2.974609 |
| OID20414 | EFEMP1  | Cardiometabolic | 3.7855   | 5.61875 | 5.54455 | 3.12E-06 | 3.27E-05 | 3.239452 | 2.33E-05 | 0.000177 | 3.302137 |
| OID20415 | REG1A   | Cardiometabolic | 5.0667   | 5.99585 | 5.83845 | 0.000129 | 0.000512 | 1.904154 | 0.000925 | 0.003215 | 1.70214  |
| OID20416 | GGH     | Cardiometabolic | 4.6099   | 5.0561  | 5.18975 | 0.002183 | 0.005448 | 1.426223 | 0.001023 | 0.003487 | 1.637619 |
| OID20417 | TGFBI   | Cardiometabolic | 3.5308   | 4.4623  | 4.55525 | 0.021846 | 0.040046 | 1.287748 | 0.005519 | 0.013994 | 1.595435 |
| OID20418 | TIMP1   | Cardiometabolic | 4.5699   | 6.15955 | 6.1266  | 3.86E-05 | 0.000184 | 3.427009 | 0.000478 | 0.001929 | 3.567961 |
| OID20421 | PAPPA   | Inflammation    | 2.82195  | 2.73145 | 2.53825 | 0.225493 | 0.292579 | -1.14124 | 0.196767 | 0.266399 | -1.3223  |
| OID20422 | IL20RA  | Inflammation    | 0.7313   | 0.70235 | 0.7751  | 0.718075 | 0.772987 | 1.061975 | 0.608298 | 0.672619 | -1.12249 |
| OID20423 | EIF5A   | Inflammation    | -0.404   | 0.52125 | 0.55715 | 0.031899 | 0.055157 | 1.922855 | 0.190659 | 0.260054 | 1.999307 |

|          |        |                  |          |          |          |          |          |          |          |          |          |
|----------|--------|------------------|----------|----------|----------|----------|----------|----------|----------|----------|----------|
| OID20425 | RAB37  | Inflammat<br>ion | -1.4137  | -0.5069  | -0.3424  | 0.010021 | 0.020338 | 2.277262 | 0.015125 | 0.031693 | 2.552834 |
| OID20429 | LILRB4 | Inflammat<br>ion | -1.88105 | -1.66415 | -1.57035 | 0.571596 | 0.639117 | 1.043514 | 0.090448 | 0.139876 | 1.282714 |
| OID20430 | IL13   | Inflammat<br>ion | -5.16445 | -4.5561  | -3.81865 | 0.073816 | 0.11304  | 1.549551 | 0.001477 | 0.004688 | 2.693627 |
| OID20434 | LTO1   | Inflammat<br>ion | -0.91665 | -0.3177  | 0.18285  | 0.022147 | 0.040461 | 2.180335 | 0.009168 | 0.02106  | 2.698112 |
| OID20436 | LAP3   | Inflammat<br>ion | -3.9373  | -1.52915 | -1.2883  | 0.000181 | 0.000679 | 3.285698 | 0.000363 | 0.001544 | 4.568277 |
| OID20437 | AMBN   | Inflammat<br>ion | -1.5813  | 0.27585  | 0.12855  | 0.000622 | 0.001939 | 3.059615 | 0.00283  | 0.007926 | 2.85997  |
| OID20438 | LRRN1  | Inflammat<br>ion | -1.6395  | -2.1041  | -1.86525 | 0.002358 | 0.00578  | -1.18214 | 0.003838 | 0.010277 | -1.0295  |
| OID20442 | NBN    | Inflammat<br>ion | -2.6927  | -1.54655 | -1.85785 | 0.013102 | 0.026015 | 2.178825 | 0.126433 | 0.185841 | 1.90554  |
| OID20443 | FCRL3  | Inflammat<br>ion | -2.3414  | -1.494   | -1.7759  | 0.042654 | 0.070639 | 1.396872 | 0.105461 | 0.15928  | 1.219128 |
| OID20448 | NCLN   | Inflammat<br>ion | -0.22555 | 0.3515   | 0.1798   | 0.068122 | 0.105202 | 2.028973 | 0.187051 | 0.256087 | 2.008544 |
| OID20457 | SCGN   | Inflammat<br>ion | -1.59    | -1.18945 | -1.35925 | 0.036046 | 0.061267 | 1.377498 | 0.215366 | 0.287329 | 1.124279 |
| OID20458 | CXCL14 | Inflammat<br>ion | 1.23575  | 0.5367   | 0.365    | 0.16054  | 0.220341 | -1.31217 | 0.005424 | 0.013852 | -1.51987 |
| OID20459 | MVK    | Inflammat<br>ion | -3.6765  | -2.2896  | -2.56465 | 0.000177 | 0.000667 | 3.691993 | 0.000946 | 0.003266 | 2.813274 |
| OID20461 | IL3RA  | Inflammat<br>ion | -0.7875  | -0.31925 | 0.0827   | 0.036139 | 0.06133  | 1.490349 | 0.024229 | 0.046267 | 2.008544 |
| OID20462 | SIT1   | Inflammat<br>ion | -0.93915 | 0.0516   | 0.2112   | 0.020838 | 0.038606 | 1.40976  | 0.012971 | 0.028314 | 2.078078 |
| OID20465 | NRTN   | Inflammat<br>ion | -0.4911  | 1.1144   | 0.36805  | 0.000423 | 0.001394 | 3.201615 | 0.015816 | 0.032725 | 2.267339 |

|          |               |                  |          |          |          |          |          |          |          |          |          |
|----------|---------------|------------------|----------|----------|----------|----------|----------|----------|----------|----------|----------|
| OID20467 | PADI2         | Inflammat<br>ion | 0.04295  | -0.14685 | -0.53925 | 0.205181 | 0.272746 | -1.11973 | 0.004349 | 0.011396 | -1.45675 |
| OID20469 | IL17A         | Inflammat<br>ion | -3.41015 | -1.55815 | -2.17885 | 0.00067  | 0.002048 | 3.327296 | 0.006268 | 0.015588 | 2.555579 |
| OID20475 | SPRY2         | Inflammat<br>ion | 0.16375  | -0.0101  | -0.04565 | 0.72381  | 0.777322 | 1.023421 | 0.551219 | 0.6215   | -1.31731 |
| OID20480 | TNFRSF13<br>C | Inflammat<br>ion | -0.88415 | -1.06365 | -1.05495 | 0.274658 | 0.345372 | -1.04156 | 0.203844 | 0.27429  | -1.02947 |
| OID20481 | IL17D         | Inflammat<br>ion | 2.99095  | 0.7337   | 1.3505   | 1.15E-07 | 4.46E-06 | -4.54427 | 8.48E-07 | 2.18E-05 | -3.19164 |
| OID20482 | MILR1         | Inflammat<br>ion | -2.34815 | -2.649   | -2.24995 | 0.544789 | 0.61541  | -1.1113  | 0.937323 | 0.952064 | 1.081175 |
| OID20483 | PRDX3         | Inflammat<br>ion | -0.72515 | 0.92195  | 0.317    | 0.000674 | 0.002054 | 2.594488 | 0.014326 | 0.03051  | 1.52119  |
| OID20485 | IRAK1         | Inflammat<br>ion | -2.6334  | -1.6866  | -1.7051  | 0.022106 | 0.040454 | 1.607646 | 0.042132 | 0.072851 | 1.539114 |
| OID20486 | IL12RB1       | Inflammat<br>ion | -2.77555 | -2.11915 | -2.3846  | 0.02894  | 0.050761 | 1.636655 | 0.095849 | 0.146373 | 1.26164  |
| OID20487 | IL1RL2        | Inflammat<br>ion | -4.34245 | -4.1196  | -4.10525 | 0.914885 | 0.929272 | 1.12783  | 0.72502  | 0.779698 | 1.178703 |
| OID20488 | IL1A          | Inflammat<br>ion | -0.813   | 1.06085  | 1.6632   | 0.005765 | 0.012584 | 2.695681 | 0.007586 | 0.018108 | 2.729052 |
| OID20490 | FGF5          | Inflammat<br>ion | -3.59125 | -3.2666  | -3.1278  | 0.150858 | 0.208881 | 1.421732 | 0.543092 | 0.614124 | 1.243581 |
| OID20491 | CSF3          | Inflammat<br>ion | -4.08325 | -3.50525 | -2.72395 | 0.01386  | 0.027127 | 1.858257 | 0.000696 | 0.002551 | 2.532391 |
| OID20498 | IL15RA        | Inflammat<br>ion | -3.0176  | -1.98695 | -2.2524  | 0.043036 | 0.071165 | 1.657203 | 0.349442 | 0.429661 | 1.241126 |
| OID20501 | FABP9         | Inflammat<br>ion | -3.6842  | -3.17775 | -3.0697  | 0.049759 | 0.079877 | 1.243107 | 0.06744  | 0.108736 | 1.185339 |
| OID20504 | ITM2A         | Inflammat<br>ion | -0.6425  | -1.42805 | -1.0485  | 0.000486 | 0.00158  | -1.26835 | 0.089404 | 0.138651 | -1.36051 |



|          |         |                  |          |          |          |          |          |          |          |          |          |
|----------|---------|------------------|----------|----------|----------|----------|----------|----------|----------|----------|----------|
| OID20506 | IFNLR1  | Inflammat<br>ion | -0.70005 | -0.82785 | -0.8497  | 0.183832 | 0.248275 | -1.05636 | 0.232198 | 0.306067 | -1.12818 |
| OID20508 | SULT2A1 | Inflammat<br>ion | -2.3611  | -1.78845 | -1.72815 | 0.01333  | 0.026372 | 1.838781 | 0.004015 | 0.010696 | 2.008544 |
| OID20509 | SPINK4  | Inflammat<br>ion | 4.4171   | 4.7346   | 4.4366   | 0.328865 | 0.400326 | 1.304458 | 0.476399 | 0.554116 | 1.264047 |
| OID20510 | NUB1    | Inflammat<br>ion | -3.80645 | -2.7302  | -2.7283  | 0.003823 | 0.008856 | 1.845933 | 0.009874 | 0.022354 | 1.75747  |
| OID20511 | PSPN    | Inflammat<br>ion | -4.55435 | -4.574   | -4.0938  | 0.049685 | 0.079874 | 1.479746 | 0.029633 | 0.054229 | 1.79185  |
| OID20512 | ALDH3A1 | Inflammat<br>ion | 1.0631   | 5.8351   | 4.94285  | 6.7E-05  | 0.000294 | 26.24735 | 0.002125 | 0.006256 | 15.70661 |
| OID20513 | BCL2L11 | Inflammat<br>ion | 0.92765  | 1.3868   | 1.29915  | 0.020249 | 0.037749 | 1.374732 | 0.038595 | 0.067479 | 1.388378 |
| OID20520 | HLA-DRA | Inflammat<br>ion | 1.766    | 0.78865  | 1.27365  | 5.19E-06 | 4.56E-05 | -2.10089 | 0.000444 | 0.001818 | -1.72273 |
| OID20522 | EPO     | Inflammat<br>ion | 0.4091   | -1.16515 | -0.50245 | 2.75E-05 | 0.000144 | -2.08204 | 0.000298 | 0.00134  | -1.75115 |
| OID20523 | CCL7    | Inflammat<br>ion | -3.63765 | -2.4932  | -3.2355  | 0.286286 | 0.357613 | 1.538474 | 0.40199  | 0.480421 | 1.079153 |
| OID20525 | EDAR    | Inflammat<br>ion | -3.45525 | -3.03245 | -2.995   | 0.211499 | 0.278449 | 1.441929 | 0.298435 | 0.379262 | 1.417796 |
| OID20527 | DPP10   | Inflammat<br>ion | 2.34085  | 1.7245   | 1.58135  | 0.006738 | 0.014478 | -1.24229 | 0.00077  | 0.002782 | -1.2967  |
| OID20530 | LSP1    | Inflammat<br>ion | -2.41055 | -2.974   | -3.44125 | 0.00315  | 0.007437 | -1.56255 | 0.000968 | 0.003323 | -1.77732 |
| OID20531 | STX8    | Inflammat<br>ion | -0.67765 | -0.676   | -0.9579  | 0.501545 | 0.57544  | 1.002568 | 0.110171 | 0.166164 | -1.06463 |
| OID20533 | TRIM21  | Inflammat<br>ion | -4.2484  | -4.22595 | -4.93335 | 0.803776 | 0.843734 | 1.063928 | 0.06225  | 0.102321 | -1.26822 |
| OID20535 | IL7     | Inflammat<br>ion | 2.56075  | 1.77945  | 1.98425  | 0.000136 | 0.000533 | -1.72937 | 0.001864 | 0.00567  | -1.52536 |

|          |              |                  |          |          |          |          |          |          |          |          |          |
|----------|--------------|------------------|----------|----------|----------|----------|----------|----------|----------|----------|----------|
| OID20537 | SIGLEC10     | Inflammat<br>ion | -1.98085 | -2.05965 | -2.21035 | 0.166273 | 0.227925 | -1.02218 | 0.893459 | 0.92028  | -1.17243 |
| OID20538 | ISM1         | Inflammat<br>ion | -4.8989  | -6.30475 | -6.4541  | 7.71E-07 | 1.28E-05 | -3.34928 | 1.26E-07 | 6.94E-06 | -3.52238 |
| OID20540 | BTN3A2       | Inflammat<br>ion | -1.22555 | -2.02055 | -1.66745 | 0.054045 | 0.085507 | -1.51761 | 0.454713 | 0.531144 | -1.34471 |
| OID20542 | SCRN1        | Inflammat<br>ion | -0.26965 | -1.22795 | -1.23905 | 0.002323 | 0.005719 | -1.81623 | 0.000612 | 0.002356 | -2.2931  |
| OID20548 | CEACAM2<br>1 | Inflammat<br>ion | -4.6111  | -4.114   | -4.09805 | 0.037887 | 0.063511 | 1.648381 | 0.165879 | 0.231136 | 1.162677 |
| OID20550 | COL9A1       | Inflammat<br>ion | -1.6017  | -1.56335 | -1.2537  | 0.176291 | 0.239822 | 1.076054 | 0.203435 | 0.274075 | 1.045614 |
| OID20556 | CNTNAP2      | Inflammat<br>ion | 6.5171   | 6.34205  | 6.29315  | 0.13603  | 0.191244 | -1.00979 | 0.013438 | 0.029188 | -1.14175 |
| OID20560 | SELPLG       | Inflammat<br>ion | -4.1718  | -4.2851  | -4.1837  | 0.671349 | 0.728083 | -1.05625 | 0.780227 | 0.827719 | 1.053361 |
| OID20561 | CXADR        | Inflammat<br>ion | -0.3948  | -0.7592  | -0.71665 | 0.02269  | 0.041317 | -1.23705 | 0.018965 | 0.038208 | -1.19615 |
| OID20562 | IL15         | Inflammat<br>ion | -0.2888  | -0.4342  | -0.3078  | 0.200803 | 0.26725  | -1.27859 | 0.586655 | 0.652632 | -1.20556 |
| OID20563 | IL6          | Inflammat<br>ion | -0.11635 | 0.1358   | 0.79905  | 0.407312 | 0.481409 | 1.214532 | 0.072083 | 0.114541 | 1.563631 |
| OID20564 | FCAR         | Inflammat<br>ion | -2.3787  | -1.88535 | -2.24425 | 0.037107 | 0.062539 | 1.153366 | 0.032594 | 0.058477 | 1.154445 |
| OID20565 | CD83         | Inflammat<br>ion | -0.2024  | -0.46755 | -0.5227  | 0.595636 | 0.659948 | -1.05008 | 0.335807 | 0.418414 | 1.047137 |
| OID20566 | NCR1         | Inflammat<br>ion | -4.22865 | -3.54145 | -3.71125 | 0.13183  | 0.186053 | 1.364384 | 0.284564 | 0.364588 | 1.241126 |
| OID20567 | NCF2         | Inflammat<br>ion | -6.99905 | -7.2407  | -7.0723  | 0.411646 | 0.484446 | -1.1113  | 0.820043 | 0.859167 | -1.093   |
| OID20568 | NPPC         | Inflammat<br>ion | 3.51165  | 3.63245  | 3.33445  | 0.550721 | 0.621472 | 1.11632  | 0.213857 | 0.286011 | -1.09331 |

|          |               |                  |          |          |          |          |          |          |          |          |          |
|----------|---------------|------------------|----------|----------|----------|----------|----------|----------|----------|----------|----------|
| OID20569 | CCL28         | Inflammat<br>ion | -0.6838  | -0.00035 | -0.1038  | 0.021708 | 0.039913 | 1.59859  | 0.020164 | 0.040181 | 1.560924 |
| OID20570 | PTX3          | Inflammat<br>ion | -2.7987  | -2.56285 | -2.92645 | 0.893042 | 0.915556 | -1.02559 | 0.563751 | 0.63263  | 1.083463 |
| OID20571 | PTH1R         | Inflammat<br>ion | -3.3569  | -2.82925 | -2.76895 | 0.077785 | 0.118453 | 1.58447  | 0.202049 | 0.272543 | 1.299809 |
| OID20572 | EGLN1         | Inflammat<br>ion | -3.2779  | -3.13575 | -3.3408  | 0.056108 | 0.088516 | 1.1776   | 0.135801 | 0.196871 | 1.241126 |
| OID20573 | CLEC4A        | Inflammat<br>ion | -4.84415 | -4.6899  | -4.32595 | 0.66044  | 0.717273 | 1.175154 | 0.52235  | 0.5925   | 1.556872 |
| OID20574 | OSM           | Inflammat<br>ion | -5.4422  | -4.70315 | -4.54605 | 0.002242 | 0.005567 | 1.868979 | 9.32E-05 | 0.000508 | 2.313537 |
| OID20576 | IL4R          | Inflammat<br>ion | -3.58585 | -3.8316  | -3.9528  | 0.041506 | 0.068946 | -1.3583  | 0.066823 | 0.107899 | -1.08523 |
| OID20580 | LY75          | Inflammat<br>ion | -3.31365 | -3.47485 | -3.4566  | 0.225431 | 0.292579 | -1.12218 | 0.666126 | 0.725587 | -1.09194 |
| OID20584 | CD4           | Inflammat<br>ion | -3.09095 | -3.3417  | -3.12605 | 0.113532 | 0.163808 | -1.35712 | 0.867687 | 0.897946 | -1.13508 |
| OID20585 | IL17RB        | Inflammat<br>ion | -1.6646  | -2.89405 | -2.8304  | 1.59E-05 | 9.63E-05 | -2.1536  | 1.38E-05 | 0.000123 | -2.30561 |
| OID20586 | LTA           | Inflammat<br>ion | -4.81555 | -4.80475 | -4.3939  | 0.182725 | 0.247084 | -1.08621 | 0.016895 | 0.034709 | 1.388378 |
| OID20589 | HEXIM1        | Inflammat<br>ion | -3.36845 | -2.8563  | -2.92855 | 0.101507 | 0.148805 | 1.421191 | 0.159319 | 0.222844 | 1.219128 |
| OID20593 | MICB_MI<br>CA | Inflammat<br>ion | -2.05595 | -1.92615 | -2.11885 | 0.141464 | 0.198375 | -1.32708 | 0.584813 | 0.651242 | -1.16894 |
| OID20595 | CD200R1       | Inflammat<br>ion | -7.08035 | -6.3784  | -6.5463  | 0.039656 | 0.066073 | 1.1776   | 0.070291 | 0.112179 | 1.241126 |
| OID20596 | KRT19         | Inflammat<br>ion | -3.40505 | -2.189   | -2.74595 | 7.83E-05 | 0.000337 | 2.40219  | 0.025621 | 0.048033 | 1.70102  |
| OID20597 | PLXNA4        | Inflammat<br>ion | 0.8233   | -0.69455 | -0.93195 | 2.14E-05 | 0.000119 | -2.5169  | 3.79E-06 | 5.2E-05  | -2.57844 |

|          |         |                  |          |          |          |          |          |          |          |          |          |
|----------|---------|------------------|----------|----------|----------|----------|----------|----------|----------|----------|----------|
| OID20598 | PTPRM   | Inflammat<br>ion | -4.7736  | -4.52055 | -4.56115 | 0.697651 | 0.753957 | 1.091226 | 0.875985 | 0.90568  | 1.436542 |
| OID20599 | CD70    | Inflammat<br>ion | -6.37215 | -5.77165 | -5.44345 | 0.219688 | 0.286822 | -1.02883 | 0.066414 | 0.107543 | 1.79036  |
| OID20600 | TGFA    | Inflammat<br>ion | 0.21635  | 0.2434   | 0.17345  | 0.109243 | 0.158873 | 1.287034 | 0.288087 | 0.368671 | -1.08192 |
| OID20601 | IL5RA   | Inflammat<br>ion | -5.3181  | -5.73685 | -5.5641  | 0.207369 | 0.274434 | -1.48324 | 0.935914 | 0.951512 | -1.21887 |
| OID20603 | CD200   | Inflammat<br>ion | 1.756    | 0.932    | 1.0417   | 0.000815 | 0.00243  | -1.35693 | 0.000324 | 0.001399 | -1.46739 |
| OID20604 | GZMB    | Inflammat<br>ion | -5.78185 | -2.89355 | -3.82955 | 3.17E-07 | 7.73E-06 | 4.405635 | 2.58E-06 | 3.93E-05 | 6.391701 |
| OID20606 | LIFR    | Inflammat<br>ion | -3.79    | -4.8413  | -4.4315  | 2.27E-05 | 0.000126 | -1.94929 | 0.004066 | 0.010785 | -1.5495  |
| OID20607 | CD84    | Inflammat<br>ion | -5.0646  | -4.85755 | -5.02745 | 0.809904 | 0.848209 | 1.154325 | 0.744813 | 0.797081 | 1.195157 |
| OID20609 | CLEC4D  | Inflammat<br>ion | -0.4408  | -0.63305 | -0.7436  | 0.749791 | 0.79697  | -1.01621 | 0.402538 | 0.480421 | -1.1475  |
| OID20610 | CCL3    | Inflammat<br>ion | -4.4018  | -4.3362  | -4.11385 | 0.552133 | 0.622281 | -1.02979 | 0.361921 | 0.442527 | 1.012414 |
| OID20611 | TNFSF10 | Inflammat<br>ion | -6.47025 | -6.9297  | -7.05145 | 0.064499 | 0.100454 | -1.73345 | 0.012507 | 0.027411 | -1.57309 |
| OID20612 | TLR3    | Inflammat<br>ion | 1.97395  | 1.85655  | 1.8531   | 0.73497  | 0.785591 | -1.14088 | 0.899524 | 0.923063 | 1.031683 |
| OID20614 | PCDH1   | Inflammat<br>ion | -1.4962  | -1.40155 | -1.50705 | 0.595169 | 0.659948 | 1.04623  | 0.421616 | 0.498961 | 1.087338 |
| OID20615 | HPCAL1  | Inflammat<br>ion | -4.5505  | -4.79755 | -4.9292  | 0.21593  | 0.283602 | -1.23602 | 0.195839 | 0.26547  | -1.34471 |
| OID20617 | CKAP4   | Inflammat<br>ion | -0.7355  | -2.71205 | -2.4907  | 6.45E-06 | 5.13E-05 | -3.38792 | 3.7E-06  | 5.14E-05 | -3.70173 |
| OID20619 | IDS     | Inflammat<br>ion | 0.61845  | 1.01975  | 1.17605  | 0.01527  | 0.029414 | 1.528377 | 0.032827 | 0.058799 | 1.675626 |

|          |          |                  |          |          |          |          |          |          |          |          |          |
|----------|----------|------------------|----------|----------|----------|----------|----------|----------|----------|----------|----------|
| OID20620 | DFFA     | Inflammat<br>ion | -3.64985 | -4.3469  | -4.15265 | 0.909923 | 0.925813 | -1.23876 | 0.700083 | 0.755842 | -1.25518 |
| OID20621 | TGFB1    | Inflammat<br>ion | -5.6586  | -5.55995 | -5.15995 | 0.643345 | 0.705687 | 1.119768 | 0.008459 | 0.019846 | 1.291099 |
| OID20622 | CXCL17   | Inflammat<br>ion | -2.6134  | -3.23185 | -3.24645 | 0.951232 | 0.958214 | -1.12043 | 0.569976 | 0.636657 | -1.05863 |
| OID20623 | NUDC     | Inflammat<br>ion | -5.85625 | -6.0086  | -5.7745  | 0.987272 | 0.987272 | -1.1113  | 0.386906 | 0.466326 | 1.020517 |
| OID20624 | TNFSF12  | Inflammat<br>ion | 2.8452   | 2.22175  | 2.0978   | 0.001383 | 0.00374  | -1.66342 | 0.000154 | 0.000768 | -1.49319 |
| OID20625 | EIF4G1   | Inflammat<br>ion | -4.88855 | -4.45155 | -4.33455 | 0.075555 | 0.115542 | 1.448992 | 0.227328 | 0.30161  | 1.516978 |
| OID20626 | BSG      | Inflammat<br>ion | -0.0844  | -0.3676  | -0.5196  | 0.085333 | 0.128175 | -1.10723 | 0.008483 | 0.019861 | -1.13579 |
| OID20627 | DNAJA2   | Inflammat<br>ion | -3.49605 | -3.04495 | -3.11985 | 0.048154 | 0.078099 | 1.288149 | 0.413044 | 0.49035  | 1.134534 |
| OID20628 | CD244    | Inflammat<br>ion | -5.02685 | -4.85525 | -5.02505 | 0.528414 | 0.599998 | 1.160382 | 0.789576 | 0.834349 | 1.008492 |
| OID20629 | KLRB1    | Inflammat<br>ion | -5.4875  | -5.05125 | -4.9577  | 0.157776 | 0.21709  | 1.142703 | 0.035052 | 0.062175 | 1.140606 |
| OID20630 | SERPINB8 | Inflammat<br>ion | -2.94295 | -1.99055 | -2.37955 | 1.26E-05 | 8.11E-05 | 1.528165 | 0.001635 | 0.005116 | 1.779905 |
| OID20631 | CXCL8    | Inflammat<br>ion | 0.1215   | 0.60075  | 0.6379   | 0.035197 | 0.060104 | 1.296345 | 0.016914 | 0.034709 | 1.229695 |
| OID20632 | KLRD1    | Inflammat<br>ion | -7.28635 | -7.23065 | -6.7525  | 0.654045 | 0.712442 | -1.19433 | 0.482663 | 0.559624 | 1.298189 |
| OID20633 | IL16     | Inflammat<br>ion | -5.7923  | -5.42175 | -5.3788  | 0.266441 | 0.33782  | 1.089752 | 0.216276 | 0.287844 | 1.275931 |
| OID20634 | NFASC    | Inflammat<br>ion | 1.56225  | 1.74475  | 1.77655  | 0.008877 | 0.018391 | 1.274958 | 0.006275 | 0.015588 | 1.355476 |
| OID20635 | CD79B    | Inflammat<br>ion | -5.4918  | -4.9476  | -4.736   | 0.052896 | 0.084174 | 1.196027 | 0.008991 | 0.020783 | 1.32464  |

|          |               |                  |          |          |          |          |          |          |          |          |          |
|----------|---------------|------------------|----------|----------|----------|----------|----------|----------|----------|----------|----------|
| OID20636 | CLEC7A        | Inflammat<br>ion | -0.41005 | -0.59905 | -0.57725 | 0.120914 | 0.172645 | -1.14969 | 0.389241 | 0.468113 | -1.10726 |
| OID20637 | CD22          | Inflammat<br>ion | -7.2086  | -7.10405 | -6.91885 | 0.533655 | 0.604699 | 1.04968  | 0.73497  | 0.787314 | 1.233194 |
| OID20638 | LAMP3         | Inflammat<br>ion | -7.7052  | -6.6222  | -6.8675  | 0.001485 | 0.003957 | 1.939184 | 0.007755 | 0.018392 | 1.801252 |
| OID20641 | GMPR          | Inflammat<br>ion | -2.7476  | -1.08225 | -1.0081  | 0.003219 | 0.007553 | 2.449946 | 0.001948 | 0.005829 | 2.695401 |
| OID20642 | TPSAB1        | Inflammat<br>ion | -6.61895 | -6.27055 | -5.86405 | 0.142975 | 0.200239 | 1.273148 | 0.016084 | 0.033133 | 2.433445 |
| OID20643 | PPP1R9B       | Inflammat<br>ion | -4.27765 | -4.3047  | -4.2659  | 0.658158 | 0.715502 | 1.521242 | 0.92463  | 0.941784 | -1.29092 |
| OID20645 | ADA           | Inflammat<br>ion | -4.40305 | -3.64875 | -3.74165 | 8.01E-05 | 0.000344 | 1.547136 | 0.00078  | 0.002809 | 1.526471 |
| OID20646 | TNFRSF11<br>A | Inflammat<br>ion | -2.77375 | -2.864   | -2.7778  | 0.635403 | 0.699771 | -1.01248 | 0.67977  | 0.737537 | -1.02151 |
| OID20647 | CD160         | Inflammat<br>ion | -5.73765 | -5.4174  | -5.27805 | 0.287076 | 0.357786 | 1.209701 | 0.012956 | 0.028314 | 1.388233 |
| OID20649 | CD6           | Inflammat<br>ion | -8.0597  | -7.75905 | -7.4901  | 0.284762 | 0.356114 | 1.711724 | 0.075836 | 0.119943 | 1.56857  |
| OID20650 | VEGFA         | Inflammat<br>ion | 0.9764   | -0.12615 | 0.0236   | 5.56E-05 | 0.000251 | -2.01224 | 0.000319 | 0.001393 | -1.78151 |
| OID20651 | ADAM23        | Inflammat<br>ion | -2.0002  | -3.74925 | -3.68225 | 1.39E-09 | 2.47E-07 | -3.40428 | 1.65E-08 | 2.26E-06 | -2.98225 |
| OID20652 | IL18R1        | Inflammat<br>ion | -5.2108  | -5.08895 | -5.3255  | 0.175144 | 0.238595 | 1.140092 | 0.334142 | 0.416918 | -1.0572  |
| OID20653 | TNFRSF4       | Inflammat<br>ion | -5.16505 | -4.37915 | -4.38605 | 0.001189 | 0.003279 | 1.496041 | 0.001069 | 0.003566 | 1.309213 |
| OID20654 | C1QA          | Inflammat<br>ion | -3.46565 | -4.5033  | -4.0893  | 5.42E-05 | 0.000247 | -1.94767 | 0.024581 | 0.046615 | -1.59649 |
| OID20656 | HGF           | Inflammat<br>ion | 3.45475  | 1.93805  | 2.22985  | 7.13E-08 | 3.26E-06 | -2.62934 | 2.84E-06 | 4.23E-05 | -2.68068 |

|          |        |                  |          |          |          |          |          |          |          |          |          |
|----------|--------|------------------|----------|----------|----------|----------|----------|----------|----------|----------|----------|
| OID20657 | MERTK  | Inflammat<br>ion | -4.51565 | -5.9948  | -5.467   | 9.91E-05 | 0.000406 | -2.03941 | 0.003195 | 0.008838 | -1.89612 |
| OID20658 | AGRP   | Inflammat<br>ion | -1.8363  | -3.57595 | -4.0345  | 2.05E-05 | 0.000116 | -3.13453 | 1.05E-06 | 2.38E-05 | -3.7218  |
| OID20660 | CTSO   | Inflammat<br>ion | 1.73265  | 1.1885   | 1.3656   | 0.016895 | 0.031985 | -1.29563 | 0.047687 | 0.080802 | -1.18954 |
| OID20661 | FLT3LG | Inflammat<br>ion | -1.5365  | -1.5026  | -1.36205 | 0.789571 | 0.832148 | 1        | 0.405197 | 0.483068 | 1.121166 |
| OID20662 | VEGFD  | Inflammat<br>ion | -8.64545 | -9.7392  | -9.1256  | 0.001855 | 0.004769 | -1.67725 | 0.123422 | 0.182393 | -1.41069 |
| OID20663 | GZMA   | Inflammat<br>ion | -5.317   | -4.95785 | -4.18775 | 0.016305 | 0.031136 | 1.307173 | 0.002034 | 0.006052 | 2.159803 |
| OID20664 | CLSTN2 | Inflammat<br>ion | 3.5487   | 3.64245  | 3.73995  | 0.086399 | 0.128895 | 1.122138 | 0.009977 | 0.022541 | 1.27253  |
| OID20665 | FASLG  | Inflammat<br>ion | -6.338   | -5.53315 | -5.92815 | 0.006912 | 0.014823 | 1.501704 | 0.003204 | 0.00884  | 1.585348 |
| OID20666 | IL12B  | Inflammat<br>ion | -4.98965 | -3.8454  | -3.52945 | 9.27E-05 | 0.000387 | 1.709116 | 4.18E-06 | 5.53E-05 | 1.898553 |
| OID20667 | CDSN   | Inflammat<br>ion | -4.6989  | -4.12625 | -4.40775 | 0.437747 | 0.510782 | 1.1776   | 0.349237 | 0.429661 | 1.265493 |
| OID20668 | CCL11  | Inflammat<br>ion | -6.8499  | -7.8764  | -7.54475 | 0.001759 | 0.004545 | -1.8377  | 0.00961  | 0.021892 | -1.54355 |
| OID20669 | KYNU   | Inflammat<br>ion | -5.87685 | -4.6439  | -4.2448  | 0.031045 | 0.053851 | 1.90587  | 0.009507 | 0.021701 | 2.846916 |
| OID20670 | LY9    | Inflammat<br>ion | -7.0326  | -6.495   | -6.26935 | 0.079892 | 0.120662 | 1.263828 | 0.05018  | 0.084376 | 1.659444 |
| OID20671 | CCL20  | Inflammat<br>ion | -5.00875 | -5.1361  | -5.55015 | 0.900389 | 0.92051  | -1.11199 | 0.238235 | 0.311407 | -1.45538 |
| OID20672 | MMP1   | Inflammat<br>ion | -3.2775  | -3.02005 | -2.8872  | 0.003192 | 0.007522 | 1.550464 | 0.000594 | 0.002309 | 1.552722 |
| OID20673 | PGF    | Inflammat<br>ion | -3.20005 | -4.53755 | -4.5167  | 3.47E-05 | 0.00017  | -2.8567  | 0.000473 | 0.001916 | -2.01768 |

|          |         |                  |          |          |          |          |          |          |          |          |          |
|----------|---------|------------------|----------|----------|----------|----------|----------|----------|----------|----------|----------|
| OID20674 | CCL25   | Inflammat<br>ion | -6.3784  | -6.50165 | -6.3352  | 0.122392 | 0.174076 | -1.26387 | 0.366093 | 0.446633 | -1.17952 |
| OID20675 | CXCL9   | Inflammat<br>ion | 0.29195  | 0.83035  | 0.94135  | 0.035902 | 0.061117 | 1.249846 | 0.022847 | 0.044386 | 1.369263 |
| OID20676 | SMPDL3A | Inflammat<br>ion | 1.31175  | 1.443    | 1.52255  | 0.557539 | 0.625996 | 1.138512 | 0.964567 | 0.972539 | 1.041852 |
| OID20677 | EPHA1   | Inflammat<br>ion | -3.90355 | -4.31265 | -3.94275 | 0.001584 | 0.004171 | -1.41603 | 0.423125 | 0.49956  | -1.04522 |
| OID20678 | IFNGR1  | Inflammat<br>ion | 1.60025  | 1.38405  | 1.291    | 0.021738 | 0.039913 | -1.0896  | 0.018292 | 0.036947 | -1.13391 |
| OID20679 | CTSC    | Inflammat<br>ion | 2.7979   | 2.17315  | 2.48675  | 1.4E-05  | 8.81E-05 | -1.56879 | 0.140887 | 0.20195  | -1.19897 |
| OID20680 | CD276   | Inflammat<br>ion | -1.77405 | -3.26765 | -2.65155 | 3.04E-06 | 3.23E-05 | -2.64368 | 0.000509 | 0.002045 | -1.80801 |
| OID20681 | DBNL    | Inflammat<br>ion | -3.1078  | -2.34505 | -2.54665 | 2.73E-05 | 0.000144 | 1.553853 | 0.000957 | 0.003292 | 1.415341 |
| OID20684 | TIMP3   | Inflammat<br>ion | 5.1115   | 0.91805  | 0.9212   | 3.91E-10 | 1.43E-07 | -15.9341 | 5.49E-10 | 1.51E-07 | -14.8023 |
| OID20685 | PLA2G4A | Inflammat<br>ion | -3.28975 | -2.822   | -2.89805 | 0.009006 | 0.018553 | 1.345554 | 0.027215 | 0.050391 | 1.27306  |
| OID20686 | CCL21   | Inflammat<br>ion | -1.32875 | -0.7936  | -0.6153  | 0.000131 | 0.000516 | 1.497701 | 3.68E-06 | 5.14E-05 | 1.604362 |
| OID20687 | MMP10   | Inflammat<br>ion | 0.8338   | 0.7445   | 0.8891   | 0.023394 | 0.042318 | -1.4711  | 0.15745  | 0.221074 | -1.06186 |
| OID20688 | SCGB1A1 | Inflammat<br>ion | -0.28725 | -0.29435 | -0.26405 | 0.013366 | 0.026396 | 1.248287 | 0.001312 | 0.004267 | 1.499415 |
| OID20689 | ENPP7   | Inflammat<br>ion | -3.5575  | -3.28295 | -2.92725 | 0.007956 | 0.016767 | 1.407905 | 0.000707 | 0.002578 | 1.597815 |
| OID20690 | SIGLEC1 | Inflammat<br>ion | -2.6691  | -2.62595 | -2.27505 | 0.14944  | 0.207178 | 1.030361 | 0.056352 | 0.093749 | 1.222005 |
| OID20691 | F2R     | Inflammat<br>ion | -0.36675 | 0.24985  | 0.1319   | 0.392982 | 0.467998 | 1.376925 | 0.156112 | 0.220157 | 1.266942 |



|          |               |                  |          |          |          |          |          |          |          |          |          |
|----------|---------------|------------------|----------|----------|----------|----------|----------|----------|----------|----------|----------|
| OID20692 | CD48          | Inflammat<br>ion | -2.8348  | -2.80705 | -2.5472  | 0.795905 | 0.836272 | -1.14429 | 0.026497 | 0.049479 | 1.128495 |
| OID20693 | CCL23         | Inflammat<br>ion | -3.3866  | -3.898   | -4.08235 | 0.013699 | 0.026947 | -1.46932 | 0.025295 | 0.04788  | -1.60943 |
| OID20694 | IL18          | Inflammat<br>ion | -5.2804  | -3.74495 | -4.18775 | 0.000244 | 0.000877 | 2.069741 | 0.003727 | 0.010031 | 2.321086 |
| OID20695 | CCL4          | Inflammat<br>ion | -0.4932  | -0.2603  | -0.19405 | 0.083096 | 0.125156 | 1.251016 | 0.018015 | 0.03663  | 1.338391 |
| OID20696 | IL10RB        | Inflammat<br>ion | -0.83555 | -0.9011  | -0.8229  | 0.128568 | 0.181684 | -1.04359 | 0.580742 | 0.648024 | -1.02569 |
| OID20697 | CXCL10        | Inflammat<br>ion | -1.7184  | -2.955   | -2.70695 | 0.301761 | 0.373966 | -3.06216 | 0.677463 | 0.735761 | -2.40761 |
| OID20698 | EGF           | Inflammat<br>ion | -2.08515 | -2.25895 | -1.88865 | 0.810357 | 0.848209 | 1.006781 | 0.377926 | 0.457008 | 1.18649  |
| OID20699 | CRLF1         | Inflammat<br>ion | -0.41285 | -0.13145 | -0.13555 | 0.004341 | 0.009931 | 1.310348 | 0.001924 | 0.005803 | 1.249759 |
| OID20700 | IL1RN         | Inflammat<br>ion | -2.3713  | 1.07015  | 0.03545  | 4.54E-05 | 0.000211 | 8.301373 | 0.000936 | 0.003242 | 4.554207 |
| OID20701 | CRIM1         | Inflammat<br>ion | 4.7787   | 4.16155  | 4.1432   | 0.000481 | 0.001571 | -1.39857 | 0.000542 | 0.002163 | -1.31376 |
| OID20702 | TNFRSF13<br>B | Inflammat<br>ion | -3.21095 | -3.34595 | -3.23565 | 0.910636 | 0.925813 | -1.12596 | 0.592319 | 0.6576   | -1.37545 |
| OID20703 | ANGPTL4       | Inflammat<br>ion | -0.3679  | -0.6302  | -0.3791  | 0.918071 | 0.931647 | -1.23093 | 0.040607 | 0.070436 | 1.194577 |
| OID20704 | CST7          | Inflammat<br>ion | -2.37185 | -2.44515 | -2.11865 | 0.843929 | 0.874684 | -1.08828 | 0.031211 | 0.056272 | 1.125331 |
| OID20705 | ERBB3         | Inflammat<br>ion | -2.38155 | -2.70945 | -2.5654  | 0.005435 | 0.012032 | -1.2438  | 0.010491 | 0.023509 | -1.16143 |
| OID20706 | NELL2         | Inflammat<br>ion | 1.7861   | 2.31375  | 2.606    | 0.000459 | 0.001504 | 1.577948 | 0.000121 | 0.000618 | 1.775346 |
| OID20707 | MANF          | Inflammat<br>ion | -0.58525 | -0.2936  | -0.08415 | 0.307931 | 0.380324 | 1.24509  | 0.014538 | 0.030816 | 1.449143 |

|          |                   |                  |          |          |          |          |          |          |          |          |          |
|----------|-------------------|------------------|----------|----------|----------|----------|----------|----------|----------|----------|----------|
| OID20708 | LY6D              | Inflammat<br>ion | -0.5523  | -0.2455  | -0.13355 | 0.004493 | 0.010193 | 1.270988 | 0.000425 | 0.001762 | 1.402159 |
| OID20709 | CCN2              | Inflammat<br>ion | 1.02845  | 1.23085  | 1.1272   | 0.907881 | 0.925583 | 1.173648 | 0.760012 | 0.809402 | -1.20748 |
| OID20710 | GLOD4             | Inflammat<br>ion | 0.49755  | 1.2134   | 1.0219   | 6.4E-07  | 1.2E-05  | 1.726799 | 0.000308 | 0.001369 | 1.449495 |
| OID20711 | MGLL              | Inflammat<br>ion | -4.3945  | -3.93475 | -4.0127  | 0.004778 | 0.010728 | 1.551754 | 0.017941 | 0.036548 | 1.234391 |
| OID20712 | DNER              | Inflammat<br>ion | 2.52385  | 2.24865  | 2.32195  | 0.000396 | 0.001317 | -1.19557 | 9.93E-05 | 0.000527 | -1.20932 |
| OID20713 | BTN2A1            | Inflammat<br>ion | 3.2577   | 3.57135  | 3.51965  | 0.054011 | 0.085507 | 1.179152 | 0.093776 | 0.143807 | 1.319325 |
| OID20714 | SHMT1             | Inflammat<br>ion | -2.35445 | -0.13095 | -0.6341  | 0.000273 | 0.000951 | 4.817885 | 0.002616 | 0.007453 | 3.62241  |
| OID20715 | FGF19             | Inflammat<br>ion | -1.3271  | -3.109   | -2.6289  | 3.65E-06 | 3.61E-05 | -3.31659 | 1.64E-05 | 0.000137 | -3.2578  |
| OID20716 | CD58              | Inflammat<br>ion | -2.29935 | -2.4639  | -2.3129  | 0.374532 | 0.450423 | -1.08136 | 0.960597 | 0.969426 | 1.103893 |
| OID20717 | PTPN6             | Inflammat<br>ion | -4.82805 | -4.38035 | -4.4158  | 0.232928 | 0.300182 | 1.406929 | 0.244354 | 0.317891 | 1.41539  |
| OID20718 | HSPA1A            | Inflammat<br>ion | -0.82135 | -0.3163  | -0.50595 | 0.003108 | 0.007354 | 1.36273  | 0.104182 | 0.157565 | 1.216132 |
| OID20719 | CSF1              | Inflammat<br>ion | 0.57215  | 0.8596   | 0.65585  | 0.523984 | 0.596201 | 1.140052 | 0.859968 | 0.892481 | 1.178825 |
| OID20720 | SPINT2            | Inflammat<br>ion | 4.26135  | 4.2602   | 4.44115  | 0.757847 | 0.8032   | 1.007444 | 0.619925 | 0.681359 | 1.129826 |
| OID20721 | CKMT1A_<br>CKMT1B | Inflammat<br>ion | -4.57135 | -2.77975 | -3.18025 | 0.002488 | 0.006044 | 3.473042 | 0.019069 | 0.038321 | 2.849483 |
| OID20722 | FIS1              | Inflammat<br>ion | -2.82055 | -3.19195 | -3.06365 | 0.608961 | 0.672    | -1.29025 | 0.345162 | 0.425829 | -1.34471 |
| OID20723 | SCGB3A2           | Inflammat<br>ion | -3.8009  | -4.4886  | -4.62225 | 0.0003   | 0.001032 | -1.47258 | 0.005011 | 0.012915 | -1.57549 |

|          |               |                  |          |          |          |          |          |          |          |          |          |
|----------|---------------|------------------|----------|----------|----------|----------|----------|----------|----------|----------|----------|
| OID20724 | CD40          | Inflammat<br>ion | 0.32075  | 0.4896   | 0.3983   | 0.752759 | 0.798619 | 1.027366 | 0.452273 | 0.528856 | 1.078181 |
| OID20725 | OMD           | Inflammat<br>ion | 0.77955  | 0.53835  | 0.5661   | 0.009006 | 0.018553 | -1.24225 | 0.098901 | 0.150199 | -1.06677 |
| OID20726 | ANGPTL2       | Inflammat<br>ion | -2.66165 | -4.1967  | -4.12505 | 2.05E-05 | 0.000116 | -2.84248 | 3.88E-05 | 0.00026  | -2.65461 |
| OID20727 | GAL           | Inflammat<br>ion | -5.9339  | -5.6074  | -5.36655 | 0.274093 | 0.34513  | 1.2444   | 0.131373 | 0.191564 | 1.356087 |
| OID20728 | SCG3          | Inflammat<br>ion | 3.51375  | 3.23445  | 3.73445  | 0.106316 | 0.155027 | -1.30767 | 0.800106 | 0.842297 | 1.09509  |
| OID20729 | PDLIM7        | Inflammat<br>ion | -2.12755 | -1.34335 | -1.28735 | 0.007467 | 0.015889 | 1.50906  | 0.017283 | 0.035338 | 1.66048  |
| OID20730 | SMOC2         | Inflammat<br>ion | 1.82225  | 1.28105  | 1.24845  | 4.66E-05 | 0.000216 | -1.7796  | 0.00236  | 0.006854 | -1.59698 |
| OID20731 | TREM2         | Inflammat<br>ion | 0.67075  | -1.7062  | -1.41815 | 4.9E-07  | 1.03E-05 | -4.81805 | 6.53E-06 | 7.57E-05 | -4.58461 |
| OID20732 | MZB1          | Inflammat<br>ion | -3.91975 | -4.36565 | -3.8989  | 0.575734 | 0.642435 | -1.19951 | 0.063099 | 0.102946 | 1.167725 |
| OID20733 | TNFSF13       | Inflammat<br>ion | 3.44195  | 1.5952   | 1.9535   | 2.46E-08 | 1.42E-06 | -2.96997 | 5.72E-07 | 1.7E-05  | -2.78466 |
| OID20734 | ROBO1         | Inflammat<br>ion | 1.4582   | -0.14515 | -0.0925  | 3.5E-07  | 8.17E-06 | -2.63253 | 3.12E-06 | 4.51E-05 | -2.40719 |
| OID20735 | TNFRSF11<br>B | Inflammat<br>ion | 1.8147   | 1.18975  | 1.53125  | 0.00087  | 0.002575 | -1.54002 | 0.137505 | 0.198397 | -1.26313 |
| OID20736 | ENPP5         | Inflammat<br>ion | 2.12375  | 2.58015  | 2.5162   | 0.027204 | 0.048332 | 1.36155  | 0.149291 | 0.212333 | 1.291995 |
| OID20737 | LAIR1         | Inflammat<br>ion | 2.5166   | 2.902    | 2.6849   | 0.049085 | 0.079141 | 1.188836 | 0.028274 | 0.052002 | 1.197396 |
| OID20738 | COLEC12       | Inflammat<br>ion | 2.52945  | 3.41115  | 3.45325  | 2.35E-05 | 0.000128 | 1.995223 | 4.59E-05 | 0.0003   | 2.224683 |
| OID20739 | SIRPB1        | Inflammat<br>ion | -1.0664  | -1.20855 | -0.93885 | 0.153418 | 0.212157 | -1.09889 | 0.801728 | 0.843197 | -1.06958 |

|          |        |                  |          |          |          |          |          |          |          |          |          |
|----------|--------|------------------|----------|----------|----------|----------|----------|----------|----------|----------|----------|
| OID20740 | ANGPT1 | Inflammat<br>ion | -2.32015 | -3.0096  | -2.83985 | 0.001124 | 0.00314  | -1.48437 | 0.008705 | 0.020293 | -1.40776 |
| OID20741 | PDGFB  | Inflammat<br>ion | -5.2421  | -4.62915 | -5.2267  | 0.422392 | 0.496559 | 1.570039 | 0.805813 | 0.846682 | -1.06245 |
| OID20742 | CRKL   | Inflammat<br>ion | -2.05    | -1.96635 | -2.00655 | 0.276236 | 0.346636 | -1.05343 | 0.486324 | 0.563274 | 1.030397 |
| OID20743 | EPCAM  | Inflammat<br>ion | -3.60675 | -2.73325 | -2.87805 | 0.000685 | 0.002075 | 1.850032 | 0.006639 | 0.01627  | 1.750176 |
| OID20744 | DNPH1  | Inflammat<br>ion | -3.02495 | -2.26805 | -2.42125 | 0.009471 | 0.019329 | 1.757774 | 0.039208 | 0.068334 | 1.537728 |
| OID20745 | CCL17  | Inflammat<br>ion | -4.8509  | -5.7834  | -5.5895  | 0.300342 | 0.372628 | -1.53204 | 0.786541 | 0.832005 | -1.53251 |
| OID20746 | MEGF10 | Inflammat<br>ion | 2.26645  | 0.74705  | 0.7964   | 6.44E-08 | 3.08E-06 | -2.51612 | 5.35E-08 | 3.91E-06 | -2.15995 |
| OID20747 | CRHBP  | Inflammat<br>ion | -3.84865 | -5.06    | -4.72325 | 5.84E-06 | 4.89E-05 | -2.02434 | 0.000171 | 0.000842 | -1.84114 |
| OID20748 | LGALS4 | Inflammat<br>ion | -1.72585 | -2.29145 | -1.9857  | 0.002778 | 0.00669  | -1.43968 | 0.185526 | 0.254671 | -1.24259 |
| OID20749 | LHPP   | Inflammat<br>ion | 1.44595  | 2.18145  | 2.24725  | 7.43E-06 | 5.58E-05 | 1.626138 | 0.000545 | 0.002167 | 1.413969 |
| OID20750 | TPP1   | Inflammat<br>ion | 2.9673   | 4.29665  | 4.27625  | 2.06E-06 | 2.46E-05 | 2.817177 | 6.09E-06 | 7.19E-05 | 3.114715 |
| OID20751 | CRELD2 | Inflammat<br>ion | 0.1946   | -0.48705 | -0.54625 | 0.000131 | 0.000516 | -1.51556 | 0.000224 | 0.001046 | -1.4102  |
| OID20752 | CTRC   | Inflammat<br>ion | -4.9503  | -5.98095 | -5.84    | 0.000392 | 0.001307 | -2.04068 | 0.002705 | 0.007656 | -1.63399 |
| OID20753 | MEPE   | Inflammat<br>ion | -4.2819  | -4.88765 | -4.82165 | 0.000249 | 0.00089  | -1.8264  | 0.000287 | 0.001304 | -1.72692 |
| OID20754 | CDON   | Inflammat<br>ion | 0.99665  | 0.92015  | 0.97065  | 0.489804 | 0.563737 | 1.145438 | 0.847735 | 0.881621 | 1.02406  |
| OID20755 | ADGRE2 | Inflammat<br>ion | -4.41015 | -4.4614  | -4.42405 | 0.222039 | 0.289203 | -1.12159 | 0.27403  | 0.352738 | 1.000243 |

|          |         |                  |          |          |          |          |          |          |          |          |          |
|----------|---------|------------------|----------|----------|----------|----------|----------|----------|----------|----------|----------|
| OID20756 | AGER    | Inflammat<br>ion | -2.507   | -2.8818  | -2.89745 | 0.046317 | 0.075791 | -1.15621 | 0.451344 | 0.528333 | 1.005456 |
| OID20757 | IL1R2   | Inflammat<br>ion | -3.42955 | -2.9026  | -3.20455 | 0.000292 | 0.001011 | 1.594827 | 0.210418 | 0.282443 | 1.22731  |
| OID20758 | ESM1    | Inflammat<br>ion | 2.26295  | -0.48675 | -0.27255 | 1.48E-08 | 1.16E-06 | -5.81972 | 8.72E-08 | 5.32E-06 | -4.80588 |
| OID20759 | SPON1   | Inflammat<br>ion | 3.94565  | 4.4125   | 4.40565  | 0.428111 | 0.502207 | 1.308986 | 0.343477 | 0.424226 | 1.292666 |
| OID20760 | ATP5IF1 | Inflammat<br>ion | -1.3241  | -0.94005 | -0.8822  | 0.005574 | 0.012314 | 1.652672 | 0.036813 | 0.064673 | 1.516452 |
| OID20761 | SKAP2   | Inflammat<br>ion | -4.1964  | -4.27615 | -4.42045 | 0.902198 | 0.920645 | -1.03839 | 0.896499 | 0.922034 | -1.01614 |
| OID20762 | CXCL1   | Inflammat<br>ion | 0.7878   | -0.03965 | -0.2048  | 0.005888 | 0.012802 | -1.80344 | 0.014338 | 0.03051  | -2.04202 |
| OID20763 | PRSS8   | Inflammat<br>ion | -0.90915 | -1.1232  | -0.98865 | 0.004639 | 0.010447 | -1.21159 | 0.036683 | 0.064617 | -1.13135 |
| OID20764 | PLAUR   | Inflammat<br>ion | 0.0718   | 0.05835  | 0.2959   | 0.286837 | 0.357786 | -1.02619 | 0.732158 | 0.785832 | 1.027259 |
| OID20765 | CCL22   | Inflammat<br>ion | -8.43875 | -8.68215 | -7.9745  | 0.777746 | 0.82191  | -1.1113  | 0.975215 | 0.981472 | -1.34471 |
| OID20766 | PRELP   | Inflammat<br>ion | 3.0049   | 2.29405  | 2.7959   | 0.00268  | 0.006495 | -1.52737 | 0.170648 | 0.23748  | -1.24608 |
| OID20767 | MATN2   | Inflammat<br>ion | 0.9945   | 0.15665  | 0.29315  | 6.79E-05 | 0.000297 | -1.74158 | 0.007263 | 0.017566 | -1.5042  |
| OID20768 | LTBR    | Inflammat<br>ion | -0.43485 | -0.70025 | -0.66735 | 0.028694 | 0.05041  | -1.10347 | 0.155403 | 0.219604 | -1.02211 |
| OID20769 | LAMA4   | Inflammat<br>ion | -1.2289  | -1.04735 | -0.7481  | 0.28379  | 0.355709 | -1.15261 | 0.290281 | 0.370615 | 1.196234 |
| OID20770 | FST     | Inflammat<br>ion | -2.22985 | -3.0033  | -2.8604  | 0.001424 | 0.003822 | -1.23795 | 0.00137  | 0.004412 | -1.32492 |
| OID20771 | CHRD1   | Inflammat<br>ion | 2.841    | 3.1653   | 2.99565  | 0.019    | 0.0356   | 1.275842 | 0.023337 | 0.045033 | 1.108301 |

|          |          |                  |          |          |          |          |          |          |          |          |          |
|----------|----------|------------------|----------|----------|----------|----------|----------|----------|----------|----------|----------|
| OID20772 | CCL24    | Inflammat<br>ion | -3.77495 | -4.82765 | -4.49125 | 0.000948 | 0.002753 | -1.63824 | 0.002722 | 0.007683 | -1.81623 |
| OID20773 | LGMM     | Inflammat<br>ion | 3.02685  | 2.15705  | 2.5284   | 0.050409 | 0.080684 | -1.17723 | 0.777    | 0.825093 | -1.08309 |
| OID20774 | DAG1     | Inflammat<br>ion | 1.76305  | 1.19805  | 1.526    | 5.62E-05 | 0.000253 | -1.34406 | 0.009811 | 0.022257 | -1.27766 |
| OID20775 | PNLIPRP2 | Inflammat<br>ion | -4.52355 | -5.2995  | -5.1224  | 0.064419 | 0.100454 | -1.61748 | 0.376802 | 0.456654 | -1.22086 |
| OID20776 | OSCAR    | Inflammat<br>ion | -1.86955 | -2.59635 | -2.38935 | 9.43E-05 | 0.000391 | -1.64627 | 0.020076 | 0.04008  | -1.26861 |
| OID20777 | PON3     | Inflammat<br>ion | -6.64505 | -5.96135 | -5.8916  | 0.086237 | 0.128827 | 1.225652 | 0.012385 | 0.027252 | 1.264923 |
| OID20778 | FABP1    | Inflammat<br>ion | -0.96915 | -1.45205 | -0.97255 | 0.025668 | 0.046051 | -1.62068 | 0.413091 | 0.49035  | -1.2571  |
| OID20779 | MPIG6B   | Inflammat<br>ion | -4.82645 | -4.2244  | -4.68845 | 0.090442 | 0.13456  | 1.176621 | 0.892704 | 0.92028  | 1.090054 |
| OID20780 | B4GALT1  | Inflammat<br>ion | 0.58715  | -2.04545 | -1.55585 | 1.18E-08 | 1.08E-06 | -4.74481 | 1.99E-07 | 8.18E-06 | -4.25527 |
| OID20781 | LGALS9   | Inflammat<br>ion | 0.22905  | 0.50345  | 0.4289   | 0.001217 | 0.003341 | 1.126424 | 0.00329  | 0.009032 | 1.191724 |
| OID20782 | FSTL3    | Inflammat<br>ion | 0.606    | 0.30055  | 0.07905  | 0.097558 | 0.143976 | -1.13567 | 0.030991 | 0.055967 | -1.21167 |
| OID20783 | TNFRSF14 | Inflammat<br>ion | 3.1142   | 3.1249   | 2.9764   | 0.583473 | 0.649091 | 1.052558 | 0.479943 | 0.557648 | -1.00793 |
| OID20784 | REG4     | Inflammat<br>ion | -2.32335 | -1.80585 | -1.8878  | 0.315158 | 0.386499 | 1.077098 | 0.037945 | 0.066555 | 1.279695 |
| OID20785 | WFIKKN2  | Inflammat<br>ion | 2.0899   | 1.2088   | 1.56635  | 0.010478 | 0.021226 | -1.52832 | 0.053482 | 0.089403 | -1.23119 |
| OID20786 | AGRN     | Inflammat<br>ion | 4.5325   | 3.27285  | 3.6447   | 2.02E-05 | 0.000115 | -2.0824  | 0.006694 | 0.016333 | -1.83045 |
| OID20787 | TFF2     | Inflammat<br>ion | -0.7966  | -0.53835 | -0.3188  | 0.19838  | 0.264668 | 1.139499 | 0.019091 | 0.038321 | 1.276594 |

|          |         |              |          |          |          |          |          |          |          |          |          |
|----------|---------|--------------|----------|----------|----------|----------|----------|----------|----------|----------|----------|
| OID20788 | CXCL3   | Inflammation | -3.4606  | -5.04965 | -4.46195 | 0.002857 | 0.006833 | -3.25284 | 0.100607 | 0.152577 | -1.73418 |
| OID20789 | NME3    | Inflammation | -2.7056  | -2.6618  | -2.5473  | 0.155956 | 0.215396 | -1.06014 | 0.367879 | 0.448314 | -1.02473 |
| OID20792 | NDRG1   | Neurology    | -1.318   | -0.8489  | -1.12425 | 0.003596 | 0.0084   | 1.266064 | 0.183023 | 0.252281 | 1.108378 |
| OID20793 | ODAM    | Neurology    | -1.2412  | -1.65055 | -1.69865 | 0.391959 | 0.467287 | -1.43212 | 0.195672 | 0.26547  | -1.39441 |
| OID20797 | COPE    | Neurology    | -0.77175 | -0.24605 | -0.18575 | 0.056845 | 0.089421 | 1.549551 | 0.020769 | 0.041089 | 2.308011 |
| OID20799 | SLC16A1 | Neurology    | -1.1484  | -0.43535 | -0.61965 | 0.557582 | 0.625996 | 1.394792 | 0.809727 | 0.849169 | 1.461196 |
| OID20801 | CALB2   | Neurology    | 0.8629   | 0.05475  | -0.2186  | 0.000412 | 0.001362 | -1.52124 | 9.53E-05 | 0.000515 | -2.09333 |
| OID20806 | AMFR    | Neurology    | -1.6693  | -0.8547  | -1.09005 | 0.000762 | 0.002292 | 2.073905 | 0.030516 | 0.055291 | 1.291995 |
| OID20807 | MMP13   | Neurology    | -2.574   | -1.98895 | -2.2931  | 0.071878 | 0.11038  | 1.500091 | 0.211263 | 0.283232 | 1.298009 |
| OID20808 | CDHR1   | Neurology    | 5.02495  | 3.4523   | 3.4331   | 5.32E-07 | 1.06E-05 | -2.51324 | 1.17E-06 | 2.48E-05 | -2.88146 |
| OID20809 | IL34    | Neurology    | 5.17975  | 5.30255  | 5.09385  | 0.396657 | 0.471352 | -1.13634 | 0.144473 | 0.206014 | -1.28842 |
| OID20810 | ANXA5   | Neurology    | -0.31975 | 0.1931   | -0.6564  | 0.138564 | 0.194557 | 1.37102  | 0.499458 | 0.571255 | -1.25941 |
| OID20816 | TDGF1   | Neurology    | -1.782   | -3.02435 | -2.9928  | 0.028578 | 0.050286 | -2.35487 | 0.051846 | 0.086911 | -1.74993 |
| OID20824 | LIF     | Neurology    | 4.14795  | 5.4645   | 5.7343   | 5.46E-05 | 0.000248 | 2.387995 | 3.85E-08 | 3.25E-06 | 3.335031 |
| OID20830 | MAPT    | Neurology    | 2.869    | 3.174    | 2.75615  | 0.298645 | 0.371362 | 1.176621 | 0.915186 | 0.933898 | 1.065995 |
| OID20840 | EPHA10  | Neurology    | 2.1906   | 0.5198   | 0.64305  | 2.55E-06 | 2.83E-05 | -2.611   | 9.56E-06 | 0.0001   | -2.18185 |
| OID20841 | GHRHR   | Neurology    | -1.4195  | -0.7143  | -0.9962  | 0.101951 | 0.149256 | 1.549551 | 0.143673 | 0.205141 | 1.239192 |
| OID20846 | FKBP7   | Neurology    | -0.4188  | -0.5087  | -0.39305 | 0.59013  | 0.655833 | -1.07531 | 0.370407 | 0.450396 | 1.129826 |
| OID20847 | PTS     | Neurology    | 0.72705  | 1.0137   | 1.00845  | 0.725642 | 0.777322 | 1.029433 | 0.755449 | 0.805323 | 1.252578 |
| OID20849 | NXPH1   | Neurology    | 2.7541   | 0.30695  | 0.74465  | 1.2E-09  | 2.47E-07 | -4.09922 | 4.11E-09 | 6.44E-07 | -4.53468 |
| OID20855 | ILKAP   | Neurology    | -1.17365 | -0.5555  | -0.44215 | 0.003703 | 0.008613 | 1.912885 | 0.005712 | 0.014419 | 1.584415 |
| OID20861 | GDNF    | Neurology    | -3.616   | -2.97815 | -2.21985 | 0.009902 | 0.020171 | 1.892312 | 0.003065 | 0.008521 | 2.735207 |
| OID20862 | SLIT2   | Neurology    | 2.66085  | 0.23175  | 0.5142   | 5.54E-07 | 1.09E-05 | -5.38557 | 3.82E-05 | 0.000258 | -3.99045 |
| OID20863 | NOS1    | Neurology    | -2.02095 | -2.48715 | -2.5225  | 0.192675 | 0.257682 | -1.68395 | 0.302325 | 0.383761 | -1.25937 |
| OID20866 | MUC13   | Neurology    | -4.5923  | -3.47645 | -3.6708  | 0.001337 | 0.003635 | 2.251677 | 0.003614 | 0.009798 | 2.008544 |
| OID20871 | NEFL    | Neurology    | 0.24245  | 0.515    | -0.5245  | 0.59946  | 0.663516 | -1.17707 | 0.076088 | 0.120036 | -1.89842 |
| OID20872 | FHIT    | Neurology    | -1.2801  | -1.24845 | -0.6229  | 0.185487 | 0.249895 | 1.152327 | 0.1841   | 0.25331  | 1.526471 |

|          |              |           |          |          |          |          |          |          |          |          |          |
|----------|--------------|-----------|----------|----------|----------|----------|----------|----------|----------|----------|----------|
| OID20873 | KIRREL2      | Neurology | 1.35775  | -0.09285 | 0.0769   | 2.11E-05 | 0.000118 | -2.48045 | 0.000117 | 0.000602 | -2.37528 |
| OID20874 | CLSTN1       | Neurology | 0.71895  | 2.2011   | 2.025    | 3.74E-05 | 0.000182 | 2.788714 | 2.75E-05 | 0.000203 | 2.654058 |
| OID20876 | GSTP1        | Neurology | 0.3658   | 1.5496   | 0.8951   | 0.000371 | 0.001247 | 2.438595 | 0.022166 | 0.043254 | 1.613004 |
| OID20877 | MAX          | Neurology | -1.10005 | -0.3301  | -0.6158  | 0.033018 | 0.056646 | 1.603751 | 0.080776 | 0.126522 | 1.193418 |
| OID20880 | PTK7         | Neurology | 0.41365  | -0.50185 | -0.33275 | 0.001081 | 0.003066 | -1.44358 | 0.001027 | 0.003491 | -2.03962 |
| OID20889 | ISLR2        | Neurology | -0.3371  | -1.62895 | -1.72565 | 2.59E-05 | 0.000139 | -2.43058 | 0.00106  | 0.003547 | -1.90752 |
| OID20891 | ECE1         | Neurology | -2.44055 | -2.5139  | -2.11865 | 0.875396 | 0.899986 | -1.05493 | 0.214657 | 0.286731 | -1.06201 |
| OID20895 | AKT1S1       | Neurology | -2.597   | -2.456   | -2.6239  | 0.120711 | 0.172579 | 1.019492 | 0.487355 | 0.563873 | -1.10194 |
| OID20897 | DPEP1        | Neurology | -5.93105 | -5.5146  | -5.55085 | 0.02013  | 0.03759  | 1.714158 | 0.024091 | 0.046083 | 1.94174  |
| OID20900 | IL18RAP      | Neurology | -7.8752  | -7.07245 | -6.2581  | 0.008768 | 0.018233 | 1.928461 | 0.007638 | 0.018193 | 2.765902 |
| OID20901 | CRIP2        | Neurology | -4.4805  | -3.1433  | -3.70025 | 0.000903 | 0.002665 | 1.587658 | 0.013873 | 0.029635 | 1.302425 |
| OID20902 | PPP3R1       | Neurology | -2.0973  | -1.93655 | -2.28995 | 0.842919 | 0.874684 | -1.06319 | 0.651046 | 0.710585 | -1.17153 |
| OID20903 | DARS1        | Neurology | -2.68565 | -2.1607  | -2.38255 | 0.264504 | 0.335752 | 1.493451 | 0.750742 | 0.801863 | 1.33256  |
| OID20904 | MAD1L1       | Neurology | -3.39275 | -2.6656  | -2.84745 | 0.001412 | 0.003801 | 1.57538  | 0.025521 | 0.048033 | 1.422669 |
| OID20906 | SKAP1        | Neurology | -5.4609  | -4.07545 | -4.24805 | 0.016459 | 0.031375 | 2.397698 | 0.078415 | 0.123175 | 1.78912  |
| OID20909 | GGT5         | Neurology | -5.40185 | -4.90615 | -4.7406  | 0.64635  | 0.708276 | -1.03462 | 0.096241 | 0.146768 | 1.291636 |
| OID20910 | CLPP         | Neurology | -1.6946  | -0.66565 | -0.49335 | 0.000646 | 0.001999 | 2.325595 | 0.001805 | 0.005519 | 2.532391 |
| OID20911 | IL6          | Neurology | -0.15095 | 0.24515  | 0.58915  | 0.365829 | 0.440439 | 1.189372 | 0.070571 | 0.112464 | 1.318274 |
| OID20912 | PTPRN2       | Neurology | 2.30355  | 1.77815  | 1.76235  | 3E-05    | 0.000152 | -1.32777 | 4.71E-05 | 0.000303 | -1.39508 |
| OID20913 | NMNAT1       | Neurology | -0.9151  | -0.80455 | -0.7306  | 0.961942 | 0.967228 | 1.002012 | 0.923058 | 0.941056 | 1.042321 |
| OID20915 | CSF2RA       | Neurology | -2.21255 | -2.6693  | -2.4739  | 0.023563 | 0.042553 | -1.20752 | 0.395756 | 0.474522 | -1.16239 |
| OID20916 | PSG1         | Neurology | -4.10165 | -3.1411  | -3.1061  | 0.000186 | 0.000694 | 1.520136 | 2.63E-05 | 0.000196 | 1.655653 |
| OID20917 | DRAXIN       | Neurology | -0.6729  | -2.77095 | -2.68245 | 7.92E-06 | 5.72E-05 | -3.75341 | 1.69E-05 | 0.000141 | -3.81676 |
| OID20918 | EBAG9        | Neurology | -3.5369  | -2.8317  | -2.90395 | 0.011491 | 0.023151 | 1.400459 | 0.036722 | 0.064617 | 2.057083 |
| OID20919 | ULBP2        | Neurology | -0.1135  | -0.2461  | 0.00625  | 0.210292 | 0.277525 | -1.06884 | 0.997143 | 0.998161 | 1.016598 |
| OID20921 | ABHD14B      | Neurology | -3.7946  | -3.12785 | -3.2287  | 0.001629 | 0.00427  | 1.587493 | 0.003491 | 0.009512 | 1.505142 |
| OID20922 | PHOSPHO<br>1 | Neurology | -3.1549  | -3.06115 | -3.1299  | 0.725006 | 0.777322 | 1.070437 | 0.594058 | 0.658864 | 1.105884 |
| OID20923 | CRADD        | Neurology | -5.0573  | -4.3966  | -5.59995 | 0.108472 | 0.157961 | 1.427806 | 0.821489 | 0.859862 | -1.06847 |



|          |          |           |          |          |          |          |          |          |          |          |          |
|----------|----------|-----------|----------|----------|----------|----------|----------|----------|----------|----------|----------|
| OID20924 | SPOCK1   | Neurology | 5.27125  | 6.05975  | 5.87245  | 0.000202 | 0.000739 | 1.544243 | 0.000224 | 0.001046 | 1.454981 |
| OID20926 | WWP2     | Neurology | -4.65965 | -4.0528  | -3.95165 | 0.069696 | 0.10733  | 1.286053 | 0.057867 | 0.096125 | 1.500663 |
| OID20927 | APRT     | Neurology | -5.20815 | -3.81365 | -4.4396  | 0.009161 | 0.018837 | 2.559656 | 0.085825 | 0.134048 | 1.590687 |
| OID20931 | NAAA     | Neurology | 0.1826   | -2.14835 | -1.5515  | 5.7E-06  | 4.85E-05 | -3.36814 | 5.46E-05 | 0.000337 | -3.26278 |
| OID20932 | SERPINB9 | Neurology | -0.46115 | -0.19405 | -0.01505 | 0.032016 | 0.055186 | 1.215584 | 0.007493 | 0.017925 | 1.446333 |
| OID20933 | GFRA3    | Neurology | -3.8672  | -4.54805 | -4.4389  | 0.00026  | 0.00092  | -1.42306 | 0.010381 | 0.023348 | -1.57037 |
| OID20934 | DKK4     | Neurology | -0.02165 | 0.01615  | 0.1124   | 0.859363 | 0.886824 | 1.162596 | 0.312599 | 0.394976 | -1.00125 |
| OID20935 | EFNA4    | Neurology | -0.03335 | -1.7292  | -1.3796  | 1.41E-05 | 8.86E-05 | -2.88526 | 0.000183 | 0.000886 | -2.44765 |
| OID20936 | VWC2     | Neurology | 0.5452   | -1.86955 | -1.73785 | 9.84E-07 | 1.45E-05 | -4.20425 | 4.5E-07  | 1.45E-05 | -4.57335 |
| OID20937 | FKBP5    | Neurology | -3.4194  | -2.39275 | -2.5036  | 3.52E-05 | 0.000172 | 1.985772 | 0.000297 | 0.00134  | 1.873908 |
| OID20938 | RSPO1    | Neurology | 1.0112   | 0.02375  | 0.1323   | 3.83E-05 | 0.000184 | -2.07247 | 2.5E-05  | 0.000189 | -1.8214  |
| OID20939 | WFIKKN1  | Neurology | -4.96305 | -5.60715 | -5.25275 | 0.047521 | 0.077301 | -1.48854 | 0.036657 | 0.064617 | -1.57009 |
| OID20940 | CDCP1    | Neurology | -0.8785  | -0.6725  | -0.6979  | 0.132301 | 0.186479 | 1.142782 | 0.088889 | 0.138048 | 1.132962 |
| OID20941 | IFNGR2   | Neurology | -1.16875 | -1.3983  | -1.33685 | 0.294206 | 0.366257 | -1.12471 | 0.227718 | 0.30161  | -1.04265 |
| OID20943 | SCARB2   | Neurology | 0.1936   | -1.03335 | -0.9756  | 9.94E-08 | 4.37E-06 | -2.22677 | 1.61E-07 | 7.38E-06 | -2.42477 |
| OID20944 | GPC5     | Neurology | 0.89535  | -0.52745 | -0.3208  | 1.5E-07  | 5.14E-06 | -2.6899  | 1.43E-06 | 2.71E-05 | -2.73938 |
| OID20945 | LY96     | Neurology | -4.44565 | -4.47495 | -4.41845 | 0.269932 | 0.341288 | 1.033508 | 0.387489 | 0.466517 | 1.098702 |
| OID20946 | FLRT2    | Neurology | -2.7984  | -3.0189  | -2.7807  | 0.039644 | 0.066073 | -1.19036 | 0.611893 | 0.674557 | -1.07427 |
| OID20947 | TMPRSS5  | Neurology | 0.38835  | -0.25125 | -0.2808  | 5.12E-05 | 0.000235 | -1.56884 | 0.000217 | 0.001025 | -1.38939 |
| OID20948 | SETMAR   | Neurology | -5.60225 | -5.05065 | -5.08375 | 0.029741 | 0.051891 | 1.285964 | 0.325498 | 0.40964  | 1.328778 |
| OID20949 | GLB1     | Neurology | 0.7992   | 0.2771   | 0.29455  | 0.004107 | 0.009453 | -1.44328 | 0.003447 | 0.009415 | -1.46586 |
| OID20950 | RHOC     | Neurology | -4.1319  | -3.78135 | -3.66905 | 0.116529 | 0.167691 | 1.253403 | 0.044896 | 0.076905 | 1.311666 |
| OID20951 | MDGA1    | Neurology | 2.53625  | 1.10345  | 1.14665  | 3.94E-06 | 3.8E-05  | -2.83049 | 1.05E-05 | 0.000105 | -2.72915 |
| OID20952 | TXLNA    | Neurology | -3.07605 | -2.8802  | -3.13715 | 0.774238 | 0.818992 | -1.17789 | 0.94494  | 0.956262 | -1.0284  |
| OID20953 | TNFSF14  | Neurology | -5.67865 | -4.78665 | -5.36385 | 0.000596 | 0.001866 | 2.352427 | 0.007474 | 0.017925 | 1.543922 |
| OID20955 | STAMBP   | Neurology | -4.89375 | -4.43555 | -4.40075 | 0.004446 | 0.010107 | 1.373827 | 0.034016 | 0.060632 | 1.442329 |
| OID20956 | DNMBP    | Neurology | -3.70645 | -3.13165 | -3.22975 | 9.31E-05 | 0.000387 | 1.450198 | 0.000725 | 0.002627 | 1.359051 |
| OID20957 | TNR      | Neurology | 3.6787   | 4.22395  | 4.10465  | 0.028187 | 0.04985  | 1.302741 | 0.026941 | 0.050053 | 1.284093 |
| OID20958 | CC2D1A   | Neurology | -3.05645 | -2.56045 | -2.79205 | 0.004516 | 0.010225 | 1.303012 | 0.090357 | 0.139876 | 1.254489 |

|          |               |           |          |          |          |          |          |          |          |          |          |
|----------|---------------|-----------|----------|----------|----------|----------|----------|----------|----------|----------|----------|
| OID20959 | MITD1         | Neurology | -4.07995 | -2.64585 | -3.31925 | 7.18E-06 | 5.47E-05 | 2.500905 | 0.010398 | 0.023348 | 1.627209 |
| OID20960 | FKBP4         | Neurology | -3.4451  | -3.20285 | -3.2106  | 0.048863 | 0.079015 | 1.144645 | 0.020886 | 0.041246 | 1.219509 |
| OID20961 | NPM1          | Neurology | -2.20415 | -1.07025 | -1.36775 | 0.005434 | 0.012032 | 1.971304 | 0.038125 | 0.066765 | 2.253082 |
| OID20962 | PRDX1         | Neurology | 1.06825  | 2.0415   | 2.04965  | 6.28E-05 | 0.00028  | 1.854782 | 0.000799 | 0.002849 | 1.689856 |
| OID20963 | LPO           | Neurology | -3.8529  | -4.53555 | -4.48765 | 0.844413 | 0.874684 | -1.71642 | 0.749734 | 0.801566 | 1.010241 |
| OID20964 | TNFRSF6B      | Neurology | -2.9825  | -4.77675 | -3.80345 | 0.004387 | 0.009993 | -2.42469 | 0.090602 | 0.139904 | -3.06556 |
| OID20965 | LAIR2         | Neurology | -3.21805 | -3.4405  | -3.42475 | 0.387157 | 0.46307  | 1.200429 | 0.284139 | 0.364469 | 1.188795 |
| OID20966 | CD274         | Neurology | -1.4888  | -1.8502  | -1.92665 | 0.005737 | 0.012584 | -1.20506 | 0.065359 | 0.106003 | -1.18267 |
| OID20967 | TNFRSF10<br>A | Neurology | -2.8504  | -2.30125 | -2.3012  | 0.001124 | 0.00314  | 1.21934  | 0.00044  | 0.00181  | 1.4799   |
| OID20968 | FRZB          | Neurology | 0.0495   | 0.12445  | 0.3244   | 0.968232 | 0.971772 | 1.035301 | 0.847898 | 0.881621 | 1.142386 |
| OID20969 | PSME1         | Neurology | -4.2402  | -3.6572  | -3.71825 | 0.012855 | 0.025664 | 1.395469 | 0.029712 | 0.054282 | 1.338855 |
| OID20970 | LAYN          | Neurology | 2.1421   | 1.8541   | 1.7526   | 0.847748 | 0.877311 | 1.0475   | 0.701196 | 0.756299 | -1.10581 |
| OID20971 | SNCG          | Neurology | -2.0454  | -2.2233  | -2.21895 | 0.147043 | 0.20463  | -1.05205 | 0.251105 | 0.325902 | -1.17259 |
| OID20973 | CCS           | Neurology | -4.7676  | -4.2597  | -4.5454  | 0.013746 | 0.026953 | 1.421979 | 0.242205 | 0.315469 | 1.166511 |
| OID20974 | ADGRB3        | Neurology | -0.4112  | -1.12065 | -1.3188  | 8.95E-07 | 1.35E-05 | -1.38319 | 2.01E-07 | 8.18E-06 | -1.48519 |
| OID20975 | HNMT          | Neurology | -4.08215 | -5.5563  | -5.4383  | 0.002788 | 0.006699 | -2.20083 | 0.003655 | 0.009885 | -2.06194 |
| OID20976 | CX3CL1        | Neurology | -3.5282  | -3.5549  | -3.8368  | 0.829185 | 0.8638   | -1.02073 | 0.664962 | 0.725053 | -1.13171 |
| OID20978 | AFP           | Neurology | -6.9247  | -6.06135 | -6.35    | 0.02085  | 0.038606 | 1.758749 | 0.119651 | 0.178018 | 1.39944  |
| OID20979 | MATN3         | Neurology | -1.8429  | -2.76235 | -2.7607  | 0.048046 | 0.078039 | -1.65893 | 0.039061 | 0.068185 | -1.36495 |
| OID20980 | OBP2B         | Neurology | -1.36535 | -1.90095 | -1.91265 | 6.31E-05 | 0.00028  | -1.44033 | 2.09E-05 | 0.000167 | -1.7483  |
| OID20981 | TNFRSF10<br>B | Neurology | -1.12925 | -1.0757  | -1.0641  | 0.012246 | 0.024627 | 1.309395 | 0.030346 | 0.055166 | 1.264792 |
| OID20982 | EPHB6         | Neurology | -0.96435 | -2.6837  | -2.791   | 2.8E-07  | 7.16E-06 | -3.57031 | 1.05E-06 | 2.38E-05 | -3.36778 |
| OID20983 | CALCA         | Neurology | -3.63115 | -3.88575 | -4.0288  | 0.085251 | 0.128175 | -1.30351 | 0.012265 | 0.027096 | -1.4289  |
| OID20984 | SFRP1         | Neurology | 4.1552   | 1.5413   | 1.9412   | 2.05E-06 | 2.46E-05 | -5.43489 | 0.000125 | 0.000633 | -3.06227 |
| OID20985 | TNFRSF9       | Neurology | -3.5754  | -2.73065 | -2.68805 | 0.008867 | 0.018391 | 1.533417 | 0.000682 | 0.002529 | 1.752665 |
| OID20986 | RBKS          | Neurology | -0.6247  | -0.3104  | -0.45515 | 0.336857 | 0.409147 | 1.144248 | 0.55299  | 0.622752 | 1.134377 |
| OID20988 | CD63          | Neurology | -3.78065 | -4.0863  | -4.5287  | 0.005024 | 0.011235 | -1.29016 | 4.4E-06  | 5.58E-05 | -1.82267 |

|          |           |           |          |          |          |          |          |          |          |          |          |
|----------|-----------|-----------|----------|----------|----------|----------|----------|----------|----------|----------|----------|
| OID20989 | PSME2     | Neurology | -4.35415 | -3.7289  | -3.50825 | 0.004357 | 0.009946 | 2.000901 | 0.003378 | 0.009248 | 1.643931 |
| OID20990 | ASGR1     | Neurology | -5.1694  | -4.59805 | -4.60305 | 0.016075 | 0.030803 | 1.640289 | 0.007159 | 0.017352 | 1.481851 |
| OID20992 | FUT8      | Neurology | -3.2097  | -4.17805 | -4.11175 | 0.000797 | 0.00239  | -1.75747 | 0.000575 | 0.002265 | -1.9445  |
| OID20994 | BMP4      | Neurology | -5.2224  | -5.24355 | -5.13005 | 0.307861 | 0.380324 | -1.18715 | 0.792017 | 0.835383 | 1.105118 |
| OID20995 | CST5      | Neurology | -1.13295 | -1.34935 | -1.19155 | 0.433153 | 0.506081 | -1.01491 | 0.298211 | 0.379262 | -1.07814 |
| OID20996 | ASAH2     | Neurology | -1.0442  | -3.2211  | -2.5941  | 4E-06    | 3.8E-05  | -2.83825 | 5.3E-06  | 6.54E-05 | -3.35753 |
| OID20997 | CXCL8     | Neurology | -0.02325 | 0.38015  | 0.50545  | 0.062724 | 0.098106 | 1.187107 | 0.024013 | 0.046015 | 1.121671 |
| OID20998 | BCAN      | Neurology | 1.8278   | 1.4782   | 1.2413   | 0.006037 | 0.013074 | -1.26484 | 0.004175 | 0.01102  | -1.25959 |
| OID20999 | ACVRL1    | Neurology | -3.5669  | -3.2006  | -3.1648  | 0.066073 | 0.102469 | 1.16538  | 0.022369 | 0.043548 | 1.129043 |
| OID21001 | ADAM22    | Neurology | 2.0141   | 0.96725  | 0.8021   | 6.51E-06 | 5.14E-05 | -2.06229 | 3.16E-06 | 4.51E-05 | -2.21039 |
| OID21004 | CCL2      | Neurology | 1.04685  | 1.7064   | 1.79585  | 0.038069 | 0.063719 | 1.219128 | 0.000692 | 0.00255  | 1.819069 |
| OID21005 | CDH15     | Neurology | -2.75645 | -3.11735 | -2.667   | 0.002408 | 0.005863 | -1.51819 | 0.252068 | 0.326766 | -1.13379 |
| OID21006 | CNTN5     | Neurology | 1.86275  | 0.93815  | 0.972    | 1.1E-07  | 4.46E-06 | -1.94524 | 1.39E-07 | 6.98E-06 | -1.82273 |
| OID21007 | ROBO2     | Neurology | 1.7695   | 0.53425  | 0.72945  | 2.66E-06 | 2.86E-05 | -2.10577 | 1.11E-05 | 0.00011  | -2.09732 |
| OID21008 | CDH3      | Neurology | 1.9649   | 1.20925  | 1.1319   | 1.13E-05 | 7.4E-05  | -1.58112 | 1.22E-06 | 2.48E-05 | -1.66077 |
| OID21009 | DDR1      | Neurology | 2.4806   | 2.58705  | 2.61215  | 0.27141  | 0.342538 | 1.163483 | 0.293794 | 0.374229 | 1.163685 |
| OID21010 | CD300C    | Neurology | -0.7302  | -0.7854  | -0.96885 | 0.210967 | 0.278081 | -1.16955 | 0.861455 | 0.89318  | -1.04138 |
| OID21011 | PVR       | Neurology | -0.3353  | -1.74415 | -1.6147  | 1.65E-08 | 1.17E-06 | -2.45879 | 2.46E-08 | 3.01E-06 | -2.20473 |
| OID21012 | TXNDC5    | Neurology | 0.11755  | -0.23725 | -0.16875 | 0.067571 | 0.104644 | -1.17911 | 0.110869 | 0.166904 | -1.25946 |
| OID21013 | FUT3_FUT5 | Neurology | 4.04945  | 4.12705  | 4.6054   | 0.252165 | 0.322326 | 1.305453 | 0.015771 | 0.032725 | 1.369928 |
| OID21014 | STC1      | Neurology | 2.421    | 0.25065  | 0.75095  | 0.052792 | 0.084131 | -1.94895 | 0.442742 | 0.519926 | -1.84395 |
| OID21015 | RWDD1     | Neurology | -0.15715 | -0.04215 | -0.07805 | 0.308973 | 0.381183 | 1.105922 | 0.178737 | 0.246859 | 1.120467 |
| OID21016 | VTA1      | Neurology | -4.59425 | -3.7128  | -3.96945 | 0.0019   | 0.004864 | 1.515664 | 0.023487 | 0.045244 | 1.45902  |
| OID21017 | EZR       | Neurology | -0.87515 | 0.56455  | 0.18655  | 3E-07    | 7.49E-06 | 2.45105  | 1.27E-05 | 0.000119 | 2.071822 |
| OID21018 | CD8A      | Neurology | -6.9647  | -6.38325 | -5.8791  | 0.034551 | 0.059092 | 1.494228 | 0.0137   | 0.029463 | 2.301062 |
| OID21019 | MMP8      | Neurology | -4.26595 | -3.93255 | -3.80875 | 0.000596 | 0.001866 | 1.588428 | 0.00581  | 0.014597 | 1.533151 |
| OID21020 | SEMA4D    | Neurology | -0.13735 | -0.622   | -0.62255 | 0.002348 | 0.005767 | -1.2588  | 0.001251 | 0.00409  | -1.29424 |
| OID21021 | PDCD5     | Neurology | -2.22535 | -2.44955 | -2.6404  | 0.228154 | 0.295069 | -1.17475 | 0.882781 | 0.911847 | -1.1765  |

|          |          |           |          |          |          |          |          |          |          |          |          |
|----------|----------|-----------|----------|----------|----------|----------|----------|----------|----------|----------|----------|
| OID21022 | NSFL1C   | Neurology | -0.83945 | -0.50355 | -0.6516  | 0.005597 | 0.01234  | 1.294594 | 0.116655 | 0.174032 | 1.085831 |
| OID21023 | SERPINB6 | Neurology | 3.0121   | 2.99915  | 3.12415  | 0.263294 | 0.334603 | 1.111764 | 0.114133 | 0.171199 | 1.212429 |
| OID21024 | CXCL13   | Neurology | -4.2618  | -5.223   | -5.13985 | 0.330839 | 0.402283 | -1.82576 | 0.494377 | 0.567216 | -2.09333 |
| OID21025 | CD34     | Neurology | -5.4629  | -5.3437  | -4.98795 | 0.206889 | 0.274353 | 1.378071 | 0.231299 | 0.305615 | 1.368741 |
| OID21026 | VCAN     | Neurology | 0.7032   | 1.0537   | 0.71315  | 0.44997  | 0.523932 | 1.200346 | 0.943142 | 0.955323 | 1.011362 |
| OID21027 | PPCDC    | Neurology | -1.96405 | -1.96485 | -2.15745 | 0.398079 | 0.472021 | 1.110416 | 0.902929 | 0.924828 | -1.14457 |
| OID21028 | SMPD1    | Neurology | 2.30465  | 0.8966   | 1.22725  | 1.73E-05 | 0.000101 | -1.95511 | 0.001663 | 0.005172 | -1.92532 |
| OID21029 | BST2     | Neurology | -2.67445 | -2.34365 | -2.34235 | 0.909622 | 0.925813 | -1.09555 | 0.633106 | 0.694455 | 1.013327 |
| OID21030 | CCL19    | Neurology | -5.92305 | -6.9964  | -6.4075  | 0.037452 | 0.062974 | -3.1341  | 0.238666 | 0.311599 | -2.54788 |
| OID21031 | SULT1A1  | Neurology | -3.54015 | -3.12545 | -3.29935 | 0.983579 | 0.984998 | -1.12097 | 0.61679  | 0.679038 | -1.27606 |
| OID21032 | SUMF2    | Neurology | 2.7002   | 3.22815  | 3.0335   | 0.001712 | 0.004433 | 1.46871  | 0.007484 | 0.017925 | 1.330621 |
| OID21033 | PRL      | Neurology | -4.423   | -4.89705 | -4.29715 | 0.002399 | 0.005853 | -1.54034 | 0.690954 | 0.748193 | -1.06925 |
| OID21034 | LBR      | Neurology | -1.6785  | -0.82075 | -0.9272  | 0.002398 | 0.005853 | 1.772456 | 0.019671 | 0.039413 | 1.376591 |
| OID21035 | LAMP2    | Neurology | 0.5902   | 0.7627   | 0.7967   | 0.901556 | 0.920645 | 1.020977 | 0.445598 | 0.52272  | 1.148937 |
| OID21036 | ANXA3    | Neurology | -6.2941  | -4.6269  | -5.03195 | 5.23E-05 | 0.000239 | 3.205835 | 0.000578 | 0.002266 | 2.322534 |
| OID21037 | ENO1     | Neurology | -0.10895 | 1.54115  | 1.10505  | 6.36E-05 | 0.000281 | 2.846226 | 0.000141 | 0.000708 | 2.348029 |
| OID21038 | CHGB     | Neurology | 4.6656   | 5.14525  | 5.12775  | 6E-06    | 4.92E-05 | 1.70734  | 1.34E-05 | 0.000123 | 1.753576 |
| OID21039 | ADAM8    | Neurology | -2.69115 | -2.4268  | -2.3979  | 0.738474 | 0.787228 | 1.017021 | 0.157766 | 0.221235 | 1.105577 |
| OID21040 | CD74     | Neurology | 0.4341   | 0.2067   | 0.47985  | 0.879601 | 0.903463 | -1.15053 | 0.015192 | 0.031773 | 1.193336 |
| OID21041 | LGALS8   | Neurology | 0.4047   | 0.9501   | 0.78205  | 0.000126 | 0.000502 | 1.472584 | 0.001325 | 0.004291 | 1.368315 |
| OID21042 | CXCL11   | Neurology | -4.5138  | -4.55415 | -4.9692  | 0.217691 | 0.285232 | -1.02836 | 0.408835 | 0.48635  | -1.14461 |
| OID21043 | FABP5    | Neurology | -1.06435 | 0.74315  | 1.22325  | 0.0079   | 0.016682 | 2.401357 | 0.005321 | 0.01365  | 2.420324 |
| OID21044 | GOLM2    | Neurology | 0.10445  | -1.26585 | -0.9505  | 1.18E-07 | 4.46E-06 | -2.64313 | 1.08E-06 | 2.38E-05 | -2.05951 |
| OID21045 | RGMB     | Neurology | 2.09405  | 0.26055  | 0.436    | 1.8E-07  | 5.23E-06 | -3.37889 | 5.54E-06 | 6.68E-05 | -2.88966 |
| OID21046 | ENO2     | Neurology | 4.0769   | 4.42055  | 4.4929   | 0.006695 | 0.014413 | 1.271693 | 0.002306 | 0.006735 | 1.433359 |
| OID21047 | OXT      | Neurology | -1.1299  | -1.60115 | -1.2527  | 0.349735 | 0.422452 | -1.17601 | 0.541795 | 0.613289 | 1.162072 |
| OID21048 | SCARF2   | Neurology | -1.95305 | -1.52655 | -1.4098  | 0.000408 | 0.001354 | 1.301207 | 0.000113 | 0.000591 | 1.379313 |
| OID21049 | TNFRSF8  | Neurology | -3.70995 | -3.6974  | -3.7694  | 0.649161 | 0.709939 | 1.064592 | 0.797571 | 0.840434 | 1.0511   |
| OID21050 | THY1     | Neurology | 2.6497   | 2.69185  | 2.7325   | 0.480737 | 0.555047 | 1.034583 | 0.497903 | 0.570666 | 1.110031 |

|          |          |           |          |          |          |          |          |          |          |          |          |
|----------|----------|-----------|----------|----------|----------|----------|----------|----------|----------|----------|----------|
| OID21051 | BST1     | Neurology | -3.0593  | -2.75425 | -2.65165 | 0.01676  | 0.031838 | 1.235975 | 0.001056 | 0.003545 | 1.348916 |
| OID21052 | TNFRSF21 | Neurology | 1.2686   | 0.5103   | 0.3958   | 8.23E-07 | 1.29E-05 | -1.56303 | 9.54E-07 | 2.31E-05 | -1.41962 |
| OID21053 | CPPED1   | Neurology | -0.95475 | 0.66505  | 0.1741   | 0.000916 | 0.002697 | 3.073324 | 0.010304 | 0.023231 | 2.712833 |
| OID21054 | CPM      | Neurology | 0.5352   | 0.40905  | 0.27005  | 0.071996 | 0.110407 | -1.12459 | 0.03427  | 0.060986 | -1.09897 |
| OID21055 | NCAN     | Neurology | 2.9275   | 4.0488   | 3.97635  | 0.00228  | 0.005638 | 2.101836 | 0.000393 | 0.001658 | 2.334559 |
| OID21056 | CTSS     | Neurology | 0.3024   | 0.4112   | 0.6186   | 0.10085  | 0.148039 | 1.022535 | 0.002169 | 0.006367 | 1.266371 |
| OID21057 | NTRK3    | Neurology | -0.1054  | -0.96595 | -0.96185 | 8.06E-06 | 5.75E-05 | -1.47565 | 1.22E-06 | 2.48E-05 | -1.56765 |
| OID21058 | SCARA5   | Neurology | -3.26845 | -3.116   | -2.98895 | 0.984101 | 0.984998 | 1.077024 | 0.07312  | 0.11602  | 1.255098 |
| OID21059 | LRPAP1   | Neurology | 1.63565  | 1.14975  | 1.2092   | 0.008409 | 0.017653 | -1.37316 | 0.046907 | 0.079605 | -1.37869 |
| OID21060 | CPA2     | Neurology | -0.57835 | -0.847   | -0.90775 | 0.008438 | 0.017681 | -1.19222 | 0.00242  | 0.007012 | -1.32588 |
| OID21061 | CLEC1B   | Neurology | -4.3263  | -4.34735 | -4.101   | 0.807983 | 0.84734  | -1.09699 | 0.978404 | 0.98378  | 1.128182 |
| OID21062 | FOLR2    | Neurology | -0.9449  | -0.96305 | -0.1725  | 0.118044 | 0.169428 | 1.053215 | 0.000808 | 0.002852 | 1.667631 |
| OID21063 | MSR1     | Neurology | -0.00865 | -0.62885 | -0.9052  | 1.17E-05 | 7.65E-05 | -1.77571 | 0.000166 | 0.00082  | -1.57975 |
| OID21064 | JAM2     | Neurology | 4.5153   | 4.18945  | 4.1703   | 0.012918 | 0.025695 | -1.22999 | 0.013704 | 0.029463 | -1.0949  |
| OID21065 | RGMA     | Neurology | -0.4528  | -1.9173  | -1.61415 | 7.29E-07 | 1.27E-05 | -2.8297  | 3.03E-05 | 0.000217 | -2.18079 |
| OID21066 | DKK1     | Neurology | 0.8707   | 0.6271   | 0.54035  | 0.861002 | 0.887681 | -1.02968 | 0.153542 | 0.217535 | -1.75443 |
| OID21067 | BIN2     | Neurology | -1.8662  | -0.89225 | -1.4866  | 0.000126 | 0.000502 | 2.256442 | 0.015297 | 0.03187  | 1.372922 |
| OID21068 | CCN5     | Neurology | 0.9083   | -0.31355 | -0.0146  | 2.9E-05  | 0.000149 | -1.9668  | 0.000667 | 0.002491 | -1.98412 |
| OID21069 | CGA      | Neurology | 1.14785  | 0.89095  | 1.01865  | 0.964992 | 0.969407 | -1.04801 | 0.151524 | 0.214952 | 1.03976  |
| OID21070 | APP      | Neurology | 6.36165  | 7.43995  | 7.54365  | 5.81E-06 | 4.89E-05 | 1.98364  | 1.82E-06 | 3.21E-05 | 2.013981 |
| OID21071 | ITGAM    | Neurology | 0.06265  | 0.3397   | 0.07285  | 0.014189 | 0.027574 | 1.175521 | 0.561688 | 0.631253 | -1.09863 |
| OID21072 | APOH     | Neurology | 1.9318   | 2.32965  | 2.3097   | 0.937955 | 0.948319 | -1.05052 | 0.752786 | 0.803264 | 1.148141 |
| OID21073 | MIF      | Neurology | 4.91065  | 5.8846   | 5.8256   | 2.83E-08 | 1.52E-06 | 2.163849 | 1.5E-07  | 7.18E-06 | 2.080312 |
| OID21074 | NPTX1    | Neurology | 5.459    | 4.63615  | 4.67175  | 0.0002   | 0.000736 | -1.79061 | 0.001111 | 0.003674 | -1.59654 |
| OID21075 | GGT1     | Neurology | 0.892    | 0.8046   | 0.8454   | 0.814785 | 0.852032 | -1.05588 | 0.592287 | 0.6576   | -1.03283 |
| OID21076 | BCAM     | Neurology | 4.20585  | 4.1972   | 4.1587   | 0.487741 | 0.56229  | 1.046629 | 0.473458 | 0.55128  | 1.091188 |
| OID21077 | STIP1    | Neurology | 0.1226   | 0.57465  | 0.48555  | 0.082968 | 0.125136 | 1.28187  | 0.237666 | 0.311407 | 1.237776 |
| OID21078 | AHSP     | Neurology | -1.8156  | -1.55855 | -1.90255 | 0.20745  | 0.274434 | -1.15221 | 0.641527 | 0.70229  | -1.17952 |
| OID21079 | DSC2     | Neurology | 3.7782   | 3.83365  | 3.83395  | 0.520433 | 0.592775 | 1.025907 | 0.498832 | 0.571134 | 1.130883 |

|          |          |           |          |          |          |          |          |          |          |          |          |
|----------|----------|-----------|----------|----------|----------|----------|----------|----------|----------|----------|----------|
| OID21080 | CD164    | Neurology | 7.32675  | 8.2426   | 8.31725  | 6.67E-06 | 5.19E-05 | 2.089996 | 3.54E-05 | 0.000246 | 2.291989 |
| OID21081 | NRP2     | Neurology | 1.83155  | 0.4068   | 0.6398   | 3.01E-05 | 0.000153 | -2.28105 | 0.000321 | 0.001393 | -2.18192 |
| OID21082 | SIGLEC5  | Neurology | 2.24035  | 1.46395  | 1.83885  | 0.012618 | 0.025328 | -1.45433 | 0.08671  | 0.135046 | -1.47264 |
| OID21083 | MMP3     | Neurology | 2.03895  | 4.0783   | 2.47995  | 0.005941 | 0.012893 | 3.914288 | 0.231755 | 0.305849 | 1.310757 |
| OID21084 | WARS     | Neurology | -0.01795 | 0.0596   | 0.02765  | 0.853105 | 0.882024 | -1.50948 | 0.551313 | 0.6215   | -1.1959  |
| OID21085 | NID2     | Neurology | 4.686    | 4.72155  | 5.0341   | 0.502935 | 0.576433 | -1.0121  | 0.048956 | 0.08257  | 1.172916 |
| OID21086 | HARS1    | Neurology | 0.5842   | 1.0251   | 1.11555  | 0.005753 | 0.012584 | 1.264135 | 0.013804 | 0.029604 | 1.184436 |
| OID21087 | PEBP1    | Neurology | 6.50525  | 7.2594   | 7.2492   | 6.47E-07 | 1.2E-05  | 1.628733 | 1.4E-06  | 2.71E-05 | 1.692786 |
| OID21088 | SERPINB1 | Neurology | 3.8225   | 4.73955  | 4.07145  | 0.000209 | 0.000758 | 2.045424 | 0.005425 | 0.013852 | 1.358675 |
| OID21089 | IL17RA   | Neurology | 0.9167   | 0.90915  | 0.89545  | 0.708736 | 0.764432 | 1.014768 | 0.94853  | 0.959011 | 1.000555 |
| OID21090 | CLEC14A  | Neurology | 1.67465  | 0.72265  | 0.8214   | 1.2E-06  | 1.64E-05 | -1.77154 | 2.26E-06 | 3.69E-05 | -1.79957 |
| OID21091 | GP6      | Neurology | -1.6048  | -1.6552  | -1.20965 | 0.83251  | 0.866442 | -1.05662 | 0.189296 | 0.258516 | 1.116513 |
| OID21092 | CNTN3    | Neurology | 0.3438   | 0.2318   | 0.20695  | 0.013719 | 0.026947 | -1.13875 | 0.095476 | 0.146006 | -1.04932 |
| OID21093 | INHBC    | Neurology | -2.223   | -3.65985 | -2.94815 | 0.000373 | 0.001247 | -2.38064 | 0.045161 | 0.077128 | -1.656   |
| OID21094 | PIK3IP1  | Neurology | 5.41135  | 5.8989   | 5.95445  | 0.001566 | 0.004142 | 1.355805 | 0.003674 | 0.009912 | 1.478362 |
| OID21095 | NCAM2    | Neurology | 1.75265  | 0.24225  | 0.35615  | 1.93E-08 | 1.22E-06 | -2.48423 | 4.16E-08 | 3.26E-06 | -2.62551 |
| OID21096 | CA6      | Neurology | -3.59335 | -3.2149  | -3.0576  | 0.865439 | 0.890583 | 1.299944 | 0.696589 | 0.753551 | 1.562547 |
| OID21097 | SPINK1   | Neurology | 3.05765  | 3.80745  | 3.85245  | 0.00136  | 0.003687 | 1.4081   | 0.000638 | 0.002414 | 1.414459 |
| OID21098 | SUSD2    | Neurology | -0.24875 | -0.01265 | -0.06715 | 0.230857 | 0.297863 | 1.236318 | 0.095025 | 0.14552  | 1.184846 |
| OID21099 | MESD     | Neurology | 4.35025  | 3.42865  | 3.4863   | 0.000197 | 0.000727 | -1.88524 | 0.000244 | 0.001115 | -1.93657 |
| OID21100 | MPO      | Neurology | -3.6103  | -3.01795 | -2.8635  | 0.001652 | 0.004309 | 1.678357 | 0.000825 | 0.002885 | 1.687632 |
| OID21101 | GUCA2A   | Neurology | 2.54175  | 2.5602   | 2.7167   | 0.736012 | 0.785591 | 1.012871 | 0.913992 | 0.933547 | 1.006397 |
| OID21102 | PIGR     | Neurology | 1.38645  | 1.5777   | 1.6335   | 0.128222 | 0.181662 | 1.200512 | 0.133812 | 0.194862 | 1.160945 |
| OID21103 | MMP9     | Neurology | -2.04115 | -0.3686  | -0.76585 | 0.001106 | 0.003107 | 2.257381 | 0.000982 | 0.003358 | 1.89146  |
| OID21104 | THBS2    | Neurology | 2.34375  | 2.19095  | 2.29875  | 0.650817 | 0.710351 | -1.10336 | 0.599539 | 0.664272 | 1.218917 |
| OID21105 | PLA2G7   | Neurology | -2.6454  | -3.66675 | -3.61775 | 0.002769 | 0.006683 | -2.06859 | 0.035973 | 0.063605 | -2.11741 |
| OID21106 | NOMO1    | Neurology | 2.35645  | 1.11465  | 1.2859   | 1.8E-07  | 5.23E-06 | -2.2061  | 1.96E-06 | 3.32E-05 | -1.98618 |
| OID21107 | TNXB     | Neurology | -0.0238  | -0.70475 | -0.43365 | 0.00116  | 0.003208 | -1.38819 | 0.020562 | 0.040754 | -1.25553 |
| OID21108 | CD109    | Neurology | -0.41915 | -0.29035 | -0.3583  | 0.543783 | 0.614906 | -1.0864  | 0.790276 | 0.834349 | 1.039615 |

|          |         |           |          |          |          |          |          |          |          |          |          |
|----------|---------|-----------|----------|----------|----------|----------|----------|----------|----------|----------|----------|
| OID21109 | SPINT1  | Neurology | 2.06845  | 1.89205  | 2.0968   | 0.157416 | 0.216867 | -1.11736 | 0.610329 | 0.673509 | 1.001596 |
| OID21110 | CD99    | Neurology | 2.688    | 3.28715  | 3.18955  | 0.000627 | 0.001951 | 1.218833 | 0.001034 | 0.003495 | 1.345507 |
| OID21111 | FCRL5   | Neurology | -6.24025 | -5.6193  | -5.21155 | 0.02604  | 0.046566 | 2.256442 | 0.00111  | 0.003674 | 2.008544 |
| OID21112 | CLEC11A | Neurology | 1.3528   | -1.77955 | -0.8648  | 3.35E-06 | 3.44E-05 | -5.04533 | 0.000179 | 0.000869 | -3.63965 |
| OID21113 | DSG2    | Neurology | 1.86035  | 2.1761   | 2.23565  | 0.109904 | 0.159622 | 1.14021  | 0.045861 | 0.078192 | 1.241126 |
| OID21114 | SOD2    | Neurology | 1.94785  | 2.10425  | 2.18135  | 0.032235 | 0.055477 | 1.213185 | 0.025452 | 0.048018 | 1.247725 |
| OID21115 | NUDT5   | Neurology | 4.13835  | 3.97865  | 3.9479   | 0.225963 | 0.292579 | -1.01157 | 0.326102 | 0.40968  | -1.12264 |
| OID21116 | IL1R1   | Neurology | 2.19465  | 1.6797   | 1.8388   | 3.81E-05 | 0.000183 | -1.5132  | 0.001656 | 0.005165 | -1.33284 |
| OID21117 | CNTN4   | Neurology | 4.81255  | 4.8968   | 4.87615  | 0.527727 | 0.599839 | 1.065293 | 0.448207 | 0.52522  | 1.059953 |
| OID21118 | TMSB10  | Neurology | 4.9713   | 6.09695  | 6.00765  | 2.42E-05 | 0.000131 | 2.005553 | 0.000178 | 0.000869 | 1.979999 |
| OID21119 | CD177   | Neurology | -0.76575 | -0.3837  | -0.2216  | 0.156321 | 0.215628 | 1.242977 | 0.00748  | 0.017925 | 1.36822  |
| OID21120 | TREML2  | Neurology | -2.16695 | -1.69275 | -1.85465 | 0.543013 | 0.614668 | 1.018291 | 0.273186 | 0.352064 | 1.169871 |
| OID21121 | MYOC    | Neurology | 8.2328   | 8.0403   | 8.2921   | 0.732236 | 0.783621 | -1.06382 | 0.192315 | 0.261663 | 1.301567 |
| OID21122 | CD99L2  | Neurology | 4.65405  | 5.291    | 5.28035  | 0.000139 | 0.00054  | 1.642508 | 0.000464 | 0.001887 | 1.614626 |
| OID21123 | OGN     | Neurology | 3.52745  | 3.85375  | 4.1673   | 0.357993 | 0.431477 | 1.226672 | 0.042504 | 0.073379 | 1.327397 |
| OID21124 | PLAU    | Neurology | 2.17215  | 0.85165  | 1.31095  | 0.002914 | 0.006955 | -1.94963 | 0.068719 | 0.109991 | -1.6052  |
| OID21125 | EFNA1   | Neurology | 4.66345  | 5.0931   | 5.1235   | 4.52E-06 | 4.07E-05 | 1.426965 | 1.92E-06 | 3.32E-05 | 1.469882 |
| OID21126 | IL1RAP  | Neurology | -0.2627  | -0.37215 | -0.1321  | 0.008608 | 0.017968 | -1.07882 | 0.564067 | 0.63263  | 1.04888  |
| OID21127 | B4GAT1  | Neurology | 4.76285  | 5.9123   | 5.97875  | 8.44E-06 | 5.9E-05  | 2.611991 | 1.39E-05 | 0.000123 | 1.778795 |
| OID21128 | ALDH1A1 | Neurology | 0.55795  | 0.59305  | 1.25205  | 0.076042 | 0.116126 | 1.571944 | 0.055404 | 0.092312 | 1.655251 |
| OID21129 | PILRA   | Neurology | 3.4424   | 3.18275  | 3.38765  | 0.719653 | 0.773926 | -1.12183 | 0.345705 | 0.42602  | 1.056945 |
| OID21130 | CD300LG | Neurology | -0.41125 | 0.0078   | -0.00095 | 0.145027 | 0.202669 | 1.066179 | 0.009751 | 0.022167 | 1.184107 |
| OID21131 | PECAM1  | Neurology | -0.2224  | -0.0757  | -0.12035 | 0.606443 | 0.669894 | 1.096306 | 0.49146  | 0.56505  | 1.033437 |
| OID21132 | GNLY    | Neurology | -0.9498  | -2.53615 | -2.29505 | 0.0042   | 0.009627 | -2.69279 | 0.008794 | 0.020372 | -2.54074 |
| OID21133 | FCER2   | Neurology | 0.1392   | 0.0019   | 0.21715  | 0.825623 | 0.860906 | -1.00598 | 0.049096 | 0.082681 | 1.088167 |
| OID21134 | MFGE8   | Neurology | 6.8164   | 6.6397   | 6.65385  | 0.3147   | 0.386499 | 1.24104  | 0.568513 | 0.635669 | 1.212009 |
| OID21135 | TXNRD1  | Neurology | 2.6228   | 2.70875  | 2.66905  | 0.008515 | 0.017808 | 1.170764 | 0.216242 | 0.287844 | -1.00497 |
| OID21136 | IL7R    | Neurology | -1.8892  | -1.97365 | -1.7751  | 0.076559 | 0.116752 | -1.15926 | 0.832231 | 0.869448 | -1.07177 |
| OID21137 | HAVCR2  | Neurology | 4.0934   | 3.23005  | 3.4331   | 0.000111 | 0.00045  | -1.50822 | 0.00209  | 0.00617  | -1.32726 |

|          |          |                     |          |          |          |          |          |          |          |          |          |
|----------|----------|---------------------|----------|----------|----------|----------|----------|----------|----------|----------|----------|
| OID21138 | ARSA     | Neurology           | 5.12345  | 5.6496   | 5.74105  | 0.002246 | 0.005567 | 1.457504 | 0.002822 | 0.007926 | 1.815919 |
| OID21139 | ITGA5    | Neurology           | -3.28495 | -3.18815 | -3.07195 | 0.576377 | 0.642499 | 1.069362 | 0.30566  | 0.387546 | 1.039543 |
| OID21140 | FYB1     | Neurology           | -3.0707  | -3.58945 | -3.49915 | 0.429488 | 0.502749 | -1.41593 | 0.520502 | 0.591015 | -1.4082  |
| OID21141 | BLVRB    | Neurology           | 0.12485  | 1.203    | 0.92355  | 0.001215 | 0.003341 | 1.888316 | 0.062555 | 0.102441 | 1.514037 |
| OID21142 | RELT     | Neurology           | 7.03895  | 5.70565  | 6.0281   | 0.000583 | 0.001839 | -2.15823 | 0.000697 | 0.002551 | -1.60798 |
| OID21143 | DBI      | Neurology           | 5.29325  | 5.8902   | 5.768    | 2.82E-05 | 0.000148 | 1.473707 | 0.000101 | 0.000531 | 1.372209 |
| OID21144 | VSIG4    | Neurology           | 3.41215  | 4.32885  | 3.826    | 4.3E-05  | 0.000203 | 1.736943 | 0.025635 | 0.048033 | 1.319462 |
| OID21145 | TNFRSF1B | Neurology           | 2.91535  | 2.916    | 2.8639   | 0.562548 | 0.630693 | 1.025587 | 0.863677 | 0.894639 | -1.05172 |
| OID21146 | IGF2R    | Neurology           | 1.18715  | 0.85105  | 0.9559   | 0.001437 | 0.003848 | -1.25671 | 0.023068 | 0.044618 | -1.16078 |
| OID21147 | TIMP4    | Neurology           | 2.85125  | 1.4661   | 1.56065  | 3.32E-05 | 0.000166 | -2.57041 | 0.000186 | 0.00089  | -2.46776 |
| OID21148 | SPINK5   | Neurology           | -0.68965 | -0.30295 | -0.16175 | 1.04E-05 | 7.12E-05 | 1.334963 | 2.92E-07 | 1.1E-05  | 1.504308 |
| OID21149 | CA2      | Neurology           | 3.48325  | 3.47575  | 3.6376   | 0.11398  | 0.164239 | 1.464289 | 0.309302 | 0.39126  | 1.289311 |
| OID21150 | CTRB1    | Neurology           | 0.59755  | 0.8892   | 1.25795  | 0.478521 | 0.553653 | 1.063706 | 0.00668  | 0.016333 | 1.35327  |
| OID21151 | F11R     | Neurology           | 1.4677   | 1.58565  | 1.62055  | 0.254393 | 0.324418 | -1.00274 | 0.230414 | 0.304812 | 1.112342 |
| OID21152 | LILRA2   | Neurology           | -0.91395 | -1.03235 | -1.11875 | 0.007508 | 0.015914 | -1.23038 | 0.018159 | 0.036788 | -1.12998 |
| OID21153 | PAMR1    | Neurology           | 0.3813   | -2.0812  | -1.38275 | 3.89E-07 | 8.71E-06 | -6.19584 | 1.14E-05 | 0.000111 | -4.01862 |
| OID21154 | TFF1     | Neurology           | 3.5362   | 4.50825  | 4.40095  | 0.002154 | 0.005403 | 1.365425 | 0.00258  | 0.007376 | 1.6383   |
| OID21155 | TNFRSF1A | Neurology           | 4.7799   | 4.68335  | 4.65215  | 0.444671 | 0.518311 | 1.053945 | 0.646129 | 0.706624 | -1.0049  |
| OID21156 | CLPS     | Neurology           | -0.9214  | -2.3324  | -2.1661  | 1.12E-05 | 7.4E-05  | -2.95806 | 5.95E-05 | 0.000359 | -3.64066 |
| OID21157 | STC2     | Neurology           | 3.3009   | 3.42855  | 3.51415  | 0.002174 | 0.005438 | 1.159216 | 0.001534 | 0.004839 | 1.241514 |
| OID21158 | IGFBP4   | Neurology           | 4.7061   | 1.89495  | 2.812    | 0.001883 | 0.00483  | -2.51411 | 0.012365 | 0.027252 | -1.8569  |
| OID21159 | GRN      | Neurology           | 1.89455  | 1.85315  | 2.08635  | 0.200584 | 0.26725  | 1.033687 | 0.00064  | 0.002415 | 1.03742  |
| OID21160 | PARK7    | Neurology           | 4.2802   | 4.6736   | 4.7602   | 8.65E-05 | 0.000365 | 1.397308 | 0.000321 | 0.001393 | 1.502641 |
| OID30420 | DAND5    | Inflammat<br>ion_II | -0.2923  | 0.19855  | 0.59315  | 0.095776 | 0.141538 | 1.718143 | 0.026908 | 0.050053 | 2.470324 |
| OID30430 | FOLH1    | Inflammat<br>ion_II | -0.70795 | -0.91495 | -0.7263  | 0.789707 | 0.832148 | -1.03552 | 0.504848 | 0.575621 | -1.10995 |
| OID30442 | ST8SIA1  | Inflammat<br>ion_II | 3.79095  | 2.4374   | 2.66795  | 1.79E-12 | 1.97E-09 | -2.86126 | 9.72E-11 | 1.07E-07 | -2.62133 |



|          |         |                     |          |          |          |          |          |          |          |          |          |
|----------|---------|---------------------|----------|----------|----------|----------|----------|----------|----------|----------|----------|
| OID30447 | UNC5D   | Inflammat<br>ion_II | 2.86345  | 2.03565  | 2.16325  | 3.47E-07 | 8.17E-06 | -1.62586 | 4.05E-07 | 1.39E-05 | -1.64103 |
| OID30449 | GAD2    | Inflammat<br>ion_II | 0.80465  | 0.81605  | 1.01985  | 0.636857 | 0.700671 | -1.01428 | 0.631477 | 0.693362 | 1.153805 |
| OID30451 | NME1    | Inflammat<br>ion_II | 0.284    | 0.8236   | 0.7865   | 0.217665 | 0.285232 | 1.256012 | 0.053495 | 0.089403 | 2.071822 |
| OID30454 | FGF12   | Inflammat<br>ion_II | 0.12685  | 0.1199   | 0.44285  | 0.409216 | 0.48262  | -1.1113  | 0.127425 | 0.18655  | 1.113846 |
| OID30460 | PGR     | Inflammat<br>ion_II | -0.52765 | 0.196    | 0.26315  | 0.01681  | 0.031878 | 1.214995 | 0.06815  | 0.109239 | 1.954094 |
| OID30464 | KLRF1   | Inflammat<br>ion_II | -3.13895 | -2.0554  | -1.9909  | 0.024892 | 0.044733 | 1.549551 | 0.013199 | 0.028754 | 2.182528 |
| OID30477 | SMPD3   | Inflammat<br>ion_II | -0.35405 | 0.05195  | 0.24525  | 0.065793 | 0.102179 | 1.237947 | 0.009218 | 0.02109  | 1.615522 |
| OID30479 | TRAF3   | Inflammat<br>ion_II | -1.1907  | -0.41135 | -0.58115 | 0.0377   | 0.063295 | 1.799879 | 0.015107 | 0.031693 | 1.525783 |
| OID30480 | TERF1   | Inflammat<br>ion_II | 1.5341   | 1.1723   | 1.06405  | 0.022417 | 0.040886 | -1.13002 | 0.028819 | 0.052916 | -1.33904 |
| OID30481 | HS6ST2  | Inflammat<br>ion_II | 2.37125  | 1.5329   | 1.3656   | 1.13E-09 | 2.47E-07 | -1.76804 | 2.58E-10 | 1.19E-07 | -1.89343 |
| OID30483 | PRSS22  | Inflammat<br>ion_II | -1.32415 | -1.28435 | -1.0206  | 0.377591 | 0.453605 | -1.0147  | 0.021101 | 0.041595 | 1.297739 |
| OID30491 | ADAM12  | Inflammat<br>ion_II | -1.57545 | -1.1426  | -0.97345 | 0.023339 | 0.042287 | 1.331405 | 0.005611 | 0.014196 | 1.839993 |
| OID30509 | NAGA    | Inflammat<br>ion_II | 2.5785   | 2.15095  | 2.05935  | 0.001093 | 0.003093 | -1.35336 | 0.001468 | 0.004687 | -1.22846 |
| OID30510 | SLITRK1 | Inflammat<br>ion_II | -0.1413  | -0.9791  | -0.95345 | 3.84E-06 | 3.73E-05 | -2.00555 | 4.82E-05 | 0.000308 | -1.75583 |
| OID30515 | C1QL2   | Inflammat<br>ion_II | 4.26365  | 3.16365  | 3.21715  | 1.44E-07 | 5.09E-06 | -1.95051 | 1.59E-06 | 2.91E-05 | -1.9288  |
| OID30517 | TYRP1   | Inflammat<br>ion_II | 5.12255  | 4.61865  | 4.6991   | 0.000166 | 0.000629 | -1.29769 | 0.001566 | 0.004914 | -1.18079 |

|          |         |                     |          |          |          |          |          |          |          |          |          |
|----------|---------|---------------------|----------|----------|----------|----------|----------|----------|----------|----------|----------|
| OID30525 | BNIP3L  | Inflammat<br>ion_II | 1.7138   | 1.445    | 1.1758   | 0.065063 | 0.101189 | -1.17198 | 0.034987 | 0.062162 | -1.282   |
| OID30528 | ADAMTS1 | Inflammat<br>ion_II | 4.0651   | 2.7937   | 2.95045  | 0.000162 | 0.000618 | -2.5295  | 0.023081 | 0.044618 | -1.53677 |
| OID30529 | S100A13 | Inflammat<br>ion_II | 0.0268   | 1.3065   | 1.1855   | 2.65E-05 | 0.000141 | 2.163849 | 3.54E-05 | 0.000246 | 2.237209 |
| OID30531 | SEMA6C  | Inflammat<br>ion_II | -1.2821  | -0.87355 | -0.81705 | 0.031957 | 0.055171 | 1.1776   | 0.092145 | 0.141701 | 1.229098 |
| OID30536 | STAT2   | Inflammat<br>ion_II | -2.3597  | -1.77395 | -1.24235 | 0.005076 | 0.011329 | 1.956602 | 0.004483 | 0.011719 | 1.973354 |
| OID30538 | MTDH    | Inflammat<br>ion_II | -3.1534  | -1.07865 | -1.8894  | 0.000309 | 0.001042 | 2.738527 | 0.054433 | 0.090833 | 2.071822 |
| OID30539 | ERMAP   | Inflammat<br>ion_II | -2.4715  | -2.95535 | -2.9907  | 0.052353 | 0.083673 | -1.27235 | 0.188112 | 0.257219 | -1.1319  |
| OID30542 | GIPR    | Inflammat<br>ion_II | -0.0836  | 0.0974   | 0.21455  | 0.566994 | 0.634617 | 1.1776   | 0.227688 | 0.30161  | 1.241126 |
| OID30545 | NECTIN1 | Inflammat<br>ion_II | 0.82805  | 0.7915   | 0.6334   | 0.089752 | 0.133715 | -1.1113  | 0.020251 | 0.040282 | 1.032971 |
| OID30547 | LMOD1   | Inflammat<br>ion_II | -2.29495 | -1.8896  | -1.604   | 0.110059 | 0.159637 | 1.331359 | 0.004809 | 0.012453 | 1.338299 |
| OID30554 | VEGFB   | Inflammat<br>ion_II | -1.2623  | -1.7684  | -1.8974  | 0.017653 | 0.033361 | -1.45665 | 0.004346 | 0.011396 | -1.47734 |
| OID30559 | TOP2B   | Inflammat<br>ion_II | -2.9385  | -3.0256  | -2.29305 | 0.949555 | 0.957402 | -1.11069 | 0.441511 | 0.519036 | 1.594606 |
| OID30564 | PPL     | Inflammat<br>ion_II | -2.2201  | -0.8408  | -0.8741  | 0.001498 | 0.003983 | 1.728475 | 0.005128 | 0.013187 | 2.407774 |
| OID30565 | NXP3    | Inflammat<br>ion_II | 2.87555  | 2.3775   | 2.5267   | 0.000533 | 0.001712 | -1.37817 | 0.003804 | 0.010213 | -1.1911  |
| OID30573 | PDIA3   | Inflammat<br>ion_II | 0.4403   | -0.05475 | 0.2559   | 0.005877 | 0.012802 | -1.2902  | 0.156565 | 0.220157 | -1.2174  |
| OID30574 | GHR     | Inflammat<br>ion_II | -3.10665 | -2.45985 | -2.67785 | 0.004115 | 0.009453 | 1.651584 | 0.039421 | 0.068597 | 1.526471 |

|          |          |                     |          |          |          |          |          |          |          |          |          |
|----------|----------|---------------------|----------|----------|----------|----------|----------|----------|----------|----------|----------|
| OID30575 | BMP10    | Inflammat<br>ion_II | -5.31525 | -4.8891  | -5.057   | 0.102263 | 0.149514 | 1.190692 | 0.49282  | 0.566021 | 1.065995 |
| OID30576 | CD300A   | Inflammat<br>ion_II | -0.8317  | -0.88415 | -0.88325 | 0.891994 | 0.915335 | 1.062785 | 0.504748 | 0.575621 | 1.11265  |
| OID30578 | ERP29    | Inflammat<br>ion_II | -1.51185 | -0.96725 | -0.63095 | 0.028194 | 0.04985  | 1.311302 | 0.004231 | 0.011141 | 1.786703 |
| OID30579 | HEG1     | Inflammat<br>ion_II | -2.133   | -2.5309  | -2.5118  | 0.000659 | 0.002028 | -1.3169  | 0.000615 | 0.002359 | -1.30387 |
| OID30580 | DTD1     | Inflammat<br>ion_II | 1.1256   | 1.5006   | 1.5734   | 0.057898 | 0.090817 | 1.250712 | 0.01086  | 0.024286 | 1.478158 |
| OID30581 | CST1     | Inflammat<br>ion_II | -1.0227  | -0.9302  | -0.29025 | 0.637795 | 0.700999 | 1.088506 | 0.900723 | 0.92343  | 1.466523 |
| OID30582 | DIPK2B   | Inflammat<br>ion_II | -1.1255  | -3.2034  | -2.5197  | 6.84E-07 | 1.25E-05 | -3.74444 | 3.32E-05 | 0.000234 | -3.22746 |
| OID30583 | MXRA8    | Inflammat<br>ion_II | 0.586    | 0.522    | 0.6385   | 0.790919 | 0.832626 | -1.12479 | 0.342461 | 0.423448 | 1.065293 |
| OID30585 | ACHE     | Inflammat<br>ion_II | 4.8647   | 4.95085  | 4.994    | 0.186401 | 0.250819 | 1.106152 | 0.56534  | 0.633411 | 1.026974 |
| OID30586 | JAM3     | Inflammat<br>ion_II | 5.6882   | 5.4718   | 5.4862   | 0.146431 | 0.204037 | -1.09684 | 0.064956 | 0.105505 | -1.14211 |
| OID30587 | COL5A1   | Inflammat<br>ion_II | 1.54525  | 1.01065  | 1.2183   | 0.018469 | 0.034785 | -1.35238 | 0.134909 | 0.195939 | -1.41451 |
| OID30588 | ADGRD1   | Inflammat<br>ion_II | -2.51155 | -3.03585 | -2.80235 | 0.002044 | 0.005195 | -1.58058 | 0.015826 | 0.032725 | -1.39581 |
| OID30589 | TNFRSF17 | Inflammat<br>ion_II | -2.94645 | -3.31775 | -3.0004  | 0.67954  | 0.735833 | -1.25028 | 0.429655 | 0.506182 | -1.00521 |
| OID30590 | APPL2    | Inflammat<br>ion_II | -2.3923  | -2.43395 | -2.22665 | 0.261956 | 0.333288 | 1.112997 | 0.178134 | 0.246336 | 1.124123 |
| OID30591 | PAXX     | Inflammat<br>ion_II | -3.3618  | -4.3911  | -4.27395 | 0.004643 | 0.010447 | -2.03313 | 0.011532 | 0.025737 | -1.71    |
| OID30592 | HMCN2    | Inflammat<br>ion_II | -5.9459  | -6.1592  | -6.509   | 4.38E-06 | 4.05E-05 | -1.99868 | 7.36E-06 | 8.34E-05 | -1.79683 |

|          |          |                     |          |          |          |          |          |          |          |          |          |
|----------|----------|---------------------|----------|----------|----------|----------|----------|----------|----------|----------|----------|
| OID30593 | CELSR2   | Inflammat<br>ion_II | 2.46845  | -0.3161  | 0.2005   | 0.00027  | 0.000948 | -3.63751 | 0.001425 | 0.004563 | -2.22075 |
| OID30594 | GLA      | Inflammat<br>ion_II | -0.0639  | -0.82135 | -0.70365 | 0.048532 | 0.078596 | -1.55882 | 0.127105 | 0.186329 | -1.1743  |
| OID30595 | MENT     | Inflammat<br>ion_II | -4.6658  | -6.0769  | -5.3456  | 5.19E-07 | 1.06E-05 | -2.56641 | 0.000127 | 0.00064  | -1.69484 |
| OID30596 | PSTPIP2  | Inflammat<br>ion_II | -4.0026  | -3.89195 | -3.92915 | 0.383424 | 0.459414 | 1.075383 | 0.176471 | 0.244652 | 1.008527 |
| OID30597 | GNPDA2   | Inflammat<br>ion_II | -1.7769  | -0.97085 | -1.18255 | 1.52E-05 | 9.32E-05 | 1.67702  | 0.000658 | 0.002467 | 1.293742 |
| OID30598 | MFAP4    | Inflammat<br>ion_II | 2.1257   | 2.55275  | 2.59535  | 0.20851  | 0.275504 | 1.361078 | 0.195461 | 0.26547  | 1.545207 |
| OID30599 | SEMA3G   | Inflammat<br>ion_II | -1.22385 | -1.96795 | -1.56385 | 0.00162  | 0.004256 | -1.49231 | 0.154109 | 0.218056 | -1.17887 |
| OID30600 | GAPDH    | Inflammat<br>ion_II | -1.7166  | -0.07715 | -0.4381  | 0.037136 | 0.062539 | 2.731039 | 0.118342 | 0.176308 | 2.562408 |
| OID30601 | RLN2     | Inflammat<br>ion_II | 1.04395  | -2.76615 | -2.18285 | 6.24E-06 | 5E-05    | -10.8849 | 1.37E-05 | 0.000123 | -7.75002 |
| OID30602 | DDI2     | Inflammat<br>ion_II | -3.828   | -2.93965 | -3.7199  | 0.024739 | 0.044531 | 1.31736  | 0.400394 | 0.479425 | 1.235547 |
| OID30603 | UROD     | Inflammat<br>ion_II | -2.17215 | -0.61185 | -0.72685 | 1.42E-05 | 8.87E-05 | 2.87398  | 8.31E-05 | 0.000473 | 2.270484 |
| OID30604 | SERPINI1 | Inflammat<br>ion_II | 3.248    | 4.59785  | 4.51985  | 1.04E-05 | 7.12E-05 | 2.627972 | 2.67E-05 | 0.000198 | 2.664196 |
| OID30605 | YWHAQ    | Inflammat<br>ion_II | -1.2075  | -0.00325 | -0.42695 | 0.002071 | 0.005251 | 2.198927 | 0.016943 | 0.034709 | 1.595767 |
| OID30606 | CPA4     | Inflammat<br>ion_II | -1.28635 | -1.29705 | -1.21855 | 0.5781   | 0.643766 | 1.094256 | 0.239449 | 0.31225  | 1.066216 |
| OID30607 | PRR4     | Inflammat<br>ion_II | -1.12585 | 0.40625  | 0.43285  | 0.11023  | 0.159673 | 1.066586 | 0.025591 | 0.048033 | 1.954839 |
| OID30608 | LEG1     | Inflammat<br>ion_II | -4.2408  | -3.92235 | -4.04555 | 0.939982 | 0.949494 | 1.511153 | 0.617195 | 0.679038 | 1.021578 |

|          |         |                     |          |          |          |          |          |          |          |          |          |
|----------|---------|---------------------|----------|----------|----------|----------|----------|----------|----------|----------|----------|
| OID30609 | TPD52L2 | Inflammat<br>ion_II | -4.3508  | -4.3192  | -4.44895 | 0.312798 | 0.385036 | -1.03108 | 0.64717  | 0.707058 | 1.241126 |
| OID30610 | PCBD1   | Inflammat<br>ion_II | 0.71285  | 1.32245  | 1.63485  | 0.000268 | 0.000948 | 1.527847 | 3.29E-05 | 0.000233 | 1.794087 |
| OID30611 | GP5     | Inflammat<br>ion_II | -6.2746  | -5.5849  | -5.7566  | 0.022857 | 0.041483 | 1.267952 | 0.043796 | 0.075373 | 1.323171 |
| OID30613 | DNAJB6  | Inflammat<br>ion_II | 0.6605   | 0.67625  | 0.58885  | 0.752797 | 0.798619 | 1.048371 | 0.760991 | 0.809659 | 1.086132 |
| OID30614 | NHLRC3  | Inflammat<br>ion_II | 3.5274   | 3.39745  | 3.39775  | 0.254364 | 0.324418 | -1.09426 | 0.141829 | 0.203036 | -1.03908 |
| OID30615 | BMPER   | Inflammat<br>ion_II | -0.34785 | -1.15125 | -0.97145 | 0.000192 | 0.000714 | -1.71677 | 0.014527 | 0.030816 | -1.38867 |
| OID30616 | TBCA    | Inflammat<br>ion_II | -0.05035 | -0.29075 | -0.46565 | 0.428642 | 0.502293 | -1.03372 | 0.980356 | 0.984841 | -1.26427 |
| OID30617 | ANXA1   | Inflammat<br>ion_II | -2.52555 | 0.08365  | -0.20585 | 0.000151 | 0.000582 | 3.340815 | 0.00059  | 0.002307 | 5.770315 |
| OID30618 | C1QTNF5 | Inflammat<br>ion_II | 1.86805  | 1.4496   | 1.62705  | 0.044327 | 0.07308  | -1.4343  | 0.333524 | 0.416621 | -1.05172 |
| OID30619 | CRELD1  | Inflammat<br>ion_II | -1.5074  | -3.20205 | -3.0408  | 1.94E-09 | 2.67E-07 | -2.77233 | 9.25E-10 | 2.03E-07 | -3.29825 |
| OID30620 | C1QTNF9 | Inflammat<br>ion_II | -3.36615 | -3.50515 | -3.3717  | 0.28432  | 0.355967 | -1.04236 | 0.116281 | 0.17371  | 1.03724  |
| OID30622 | EPHA4   | Inflammat<br>ion_II | -0.68565 | -1.8448  | -1.78825 | 5.14E-07 | 1.06E-05 | -2.13909 | 3.71E-07 | 1.32E-05 | -2.36723 |
| OID30623 | GMPR2   | Inflammat<br>ion_II | -0.2317  | 1.7519   | 1.02535  | 3.38E-05 | 0.000168 | 4.061464 | 0.00115  | 0.003793 | 2.638833 |
| OID30624 | ST13    | Inflammat<br>ion_II | -4.42365 | -3.79235 | -4.1649  | 0.026805 | 0.047701 | 1.383526 | 0.059941 | 0.098821 | 1.403812 |
| OID30625 | INHBB   | Inflammat<br>ion_II | -2.8684  | -3.7201  | -3.80015 | 0.061027 | 0.095589 | -1.66238 | 0.022178 | 0.043254 | -1.8501  |
| OID30626 | FUOM    | Inflammat<br>ion_II | -4.41175 | -4.0629  | -3.9359  | 0.09538  | 0.141143 | 1.153526 | 0.006052 | 0.015104 | 1.437289 |

|          |          |                     |          |          |          |          |          |          |          |          |          |
|----------|----------|---------------------|----------|----------|----------|----------|----------|----------|----------|----------|----------|
| OID30627 | SPINK2   | Inflammat<br>ion_II | -0.9846  | -1.65065 | -1.39565 | 0.000843 | 0.002502 | -1.5481  | 0.006433 | 0.015908 | -1.41363 |
| OID30628 | CTSE     | Inflammat<br>ion_II | -2.6738  | -2.8525  | -2.90475 | 0.184372 | 0.248698 | -1.24151 | 0.950017 | 0.959631 | -1.02958 |
| OID30630 | SLC9A3R1 | Inflammat<br>ion_II | -1.17385 | -1.4244  | -1.73535 | 0.274914 | 0.345372 | -1.62119 | 0.045167 | 0.077128 | -1.56417 |
| OID30631 | GCHFR    | Inflammat<br>ion_II | 0.6734   | 1.49945  | 1.7019   | 1.49E-06 | 1.95E-05 | 2.046913 | 8.6E-05  | 0.000487 | 1.898618 |
| OID30632 | TP53I3   | Inflammat<br>ion_II | -1.32615 | 1.3898   | 0.8212   | 1.52E-06 | 1.95E-05 | 3.480151 | 1.37E-05 | 0.000123 | 3.488363 |
| OID30633 | MYOM3    | Inflammat<br>ion_II | -5.2204  | -4.64555 | -4.59795 | 0.018695 | 0.035149 | 1.423162 | 0.021276 | 0.041866 | 1.446283 |
| OID30634 | PHYKPL   | Inflammat<br>ion_II | -1.83775 | -1.02315 | -1.1767  | 0.000106 | 0.000434 | 1.769081 | 0.001404 | 0.004507 | 1.639209 |
| OID30635 | RIDA     | Inflammat<br>ion_II | 0.91495  | 0.58595  | 0.6407   | 0.000347 | 0.001168 | -1.12553 | 0.002075 | 0.006141 | -1.25666 |
| OID30638 | MOCS2    | Inflammat<br>ion_II | -0.6614  | -0.71235 | -0.5809  | 0.650831 | 0.710351 | -1.05522 | 0.355585 | 0.436237 | -1.02605 |
| OID30639 | GIMAP7   | Inflammat<br>ion_II | -2.2948  | -2.3526  | -2.10265 | 0.643076 | 0.705687 | -1.09293 | 0.997632 | 0.998161 | 1.136738 |
| OID30640 | VTI1A    | Inflammat<br>ion_II | 2.14825  | 1.61045  | 1.57115  | 3.95E-05 | 0.000188 | -1.40644 | 2.03E-06 | 3.37E-05 | -1.57778 |
| OID30641 | CD72     | Inflammat<br>ion_II | -3.32355 | -3.69875 | -3.098   | 0.863383 | 0.889301 | -1.1113  | 0.033329 | 0.059602 | 1.238935 |
| OID30642 | ACYP1    | Inflammat<br>ion_II | 1.9826   | 2.10395  | 2.11665  | 0.180699 | 0.244948 | 1.248504 | 0.333031 | 0.416478 | 1.154846 |
| OID30643 | NAGPA    | Inflammat<br>ion_II | -2.83825 | -3.311   | -3.26705 | 0.003556 | 0.008324 | -1.30554 | 0.008011 | 0.018956 | -1.16663 |
| OID30646 | FGFR4    | Inflammat<br>ion_II | -3.17065 | -3.8324  | -3.7284  | 3.78E-06 | 3.7E-05  | -1.69144 | 0.00032  | 0.001393 | -1.35079 |
| OID30647 | RABEP1   | Inflammat<br>ion_II | -1.35185 | -1.2563  | -0.86105 | 0.14508  | 0.202669 | 1.176621 | 0.024364 | 0.046363 | 1.528747 |

|          |              |                     |          |          |          |          |          |          |          |          |          |
|----------|--------------|---------------------|----------|----------|----------|----------|----------|----------|----------|----------|----------|
| OID30648 | SFRP4        | Inflammat<br>ion_II | 0.07465  | -0.0299  | 0.0078   | 0.480557 | 0.555047 | 1.035229 | 0.666774 | 0.725587 | -1.02562 |
| OID30649 | CACYBP       | Inflammat<br>ion_II | -2.4691  | -2.27205 | -2.2959  | 0.223433 | 0.290675 | 1.006432 | 0.773893 | 0.82259  | 1.033401 |
| OID30650 | SUSD5        | Inflammat<br>ion_II | 0.6541   | -0.70585 | -0.63335 | 6.08E-07 | 1.17E-05 | -2.62733 | 5.12E-07 | 1.56E-05 | -2.31362 |
| OID30652 | KLK7         | Inflammat<br>ion_II | -2.4771  | -1.5163  | -1.4367  | 0.002954 | 0.007035 | 1.732313 | 0.003058 | 0.008521 | 2.002011 |
| OID30653 | ARHGAP4<br>5 | Inflammat<br>ion_II | -1.79    | -1.21735 | -1.4156  | 0.117029 | 0.16819  | 1.1776   | 0.408562 | 0.48635  | 1.223234 |
| OID30654 | UBXN1        | Inflammat<br>ion_II | -1.7617  | -0.80255 | -1.10655 | 0.000676 | 0.002055 | 1.754123 | 0.002507 | 0.007207 | 2.0114   |
| OID30655 | ADD1         | Inflammat<br>ion_II | -2.45525 | -2.28915 | -2.4715  | 0.815771 | 0.852251 | 1.183041 | 0.899403 | 0.923063 | 1.097979 |
| OID30656 | SPART        | Inflammat<br>ion_II | -0.27905 | -1.12235 | -0.9867  | 0.000579 | 0.001832 | -1.6517  | 0.00922  | 0.02109  | -1.67446 |
| OID30658 | MARS1        | Inflammat<br>ion_II | -0.3586  | -0.69015 | -0.6528  | 0.574095 | 0.641258 | -1.1113  | 0.361793 | 0.442527 | -1.1414  |
| OID30659 | PTRHD1       | Inflammat<br>ion_II | -1.77155 | 1.05175  | 0.74015  | 7.61E-06 | 5.64E-05 | 6.359662 | 0.000722 | 0.002624 | 3.198953 |
| OID30660 | CHAD         | Inflammat<br>ion_II | -2.7962  | -1.8228  | -1.58495 | 0.00063  | 0.001954 | 1.872739 | 1.14E-05 | 0.000111 | 2.168955 |
| OID30661 | DNAJB2       | Inflammat<br>ion_II | -0.05225 | -0.6054  | -0.6089  | 0.014567 | 0.028259 | -1.39566 | 0.007097 | 0.017241 | -1.36084 |
| OID30662 | SDK2         | Inflammat<br>ion_II | -0.9598  | -1.19765 | -1.46515 | 0.079061 | 0.119571 | -1.22137 | 0.026889 | 0.050053 | -1.35858 |
| OID30665 | OLFM4        | Inflammat<br>ion_II | -2.1912  | -1.80235 | -2.08985 | 0.128395 | 0.181673 | 1.216722 | 0.363357 | 0.443789 | -1.03491 |
| OID30666 | PENK         | Inflammat<br>ion_II | 3.20685  | 1.2219   | 1.07115  | 1.11E-05 | 7.4E-05  | -2.63381 | 3.72E-05 | 0.000254 | -2.72225 |
| OID30668 | PRDX2        | Inflammat<br>ion_II | 0.7968   | 0.55175  | 0.45945  | 0.425572 | 0.499762 | -1.14231 | 0.965551 | 0.972638 | -1.14878 |

|          |                    |                     |         |          |         |          |          |          |          |          |          |
|----------|--------------------|---------------------|---------|----------|---------|----------|----------|----------|----------|----------|----------|
| OID30669 | MDH1               | Inflammat<br>ion_II | 7.30185 | 7.42265  | 7.37115 | 0.248621 | 0.318166 | 1.158935 | 0.513478 | 0.583642 | 1.064075 |
| OID30670 | TXN                | Inflammat<br>ion_II | 5.01285 | 5.6418   | 5.2276  | 0.000126 | 0.000502 | 1.760945 | 0.021343 | 0.041922 | 1.181566 |
| OID30671 | CGB3_CG<br>B5_CGB8 | Inflammat<br>ion_II | 4.51605 | 2.53785  | 2.74135 | 0.007315 | 0.015626 | -1.8551  | 0.00041  | 0.001717 | -2.27995 |
| OID30672 | RNASE1             | Inflammat<br>ion_II | 3.0689  | 5.29865  | 4.97265 | 3.52E-06 | 3.51E-05 | 4.019873 | 1.22E-05 | 0.000117 | 4.115592 |
| OID30674 | NRGN               | Inflammat<br>ion_II | 1.00265 | 1.3865   | 1.03975 | 0.085865 | 0.12858  | 1.028648 | 0.567522 | 0.635209 | 1.016845 |
| OID30675 | ABO                | Inflammat<br>ion_II | 3.50005 | 3.0889   | 3.0667  | 0.169536 | 0.231819 | -1.35411 | 0.064465 | 0.104863 | -1.41025 |
| OID30676 | PI16               | Inflammat<br>ion_II | 1.23595 | 2.0206   | 1.9862  | 4.46E-06 | 4.05E-05 | 1.911096 | 1.26E-05 | 0.000119 | 1.842545 |
| OID30677 | LCAT               | Inflammat<br>ion_II | 0.2083  | -0.48175 | -0.3401 | 0.000441 | 0.00145  | -1.50927 | 0.013627 | 0.029454 | -1.26313 |
| OID30678 | NEXN               | Inflammat<br>ion_II | 0.5921  | 1.30425  | 1.14845 | 0.00027  | 0.000948 | 1.846445 | 0.001033 | 0.003495 | 1.644558 |
| OID30679 | ASGR2              | Inflammat<br>ion_II | 2.66535 | 1.28075  | 1.30705 | 1.65E-07 | 5.23E-06 | -2.69746 | 7.61E-05 | 0.00044  | -2.07527 |
| OID30680 | GPI                | Inflammat<br>ion_II | 6.2055  | 6.6561   | 6.4781  | 6.93E-05 | 0.000302 | 1.383814 | 0.005454 | 0.013894 | 1.448239 |
| OID30681 | CSF1R              | Inflammat<br>ion_II | 4.2377  | 4.6164   | 4.59625 | 0.021652 | 0.039889 | 1.240696 | 0.112731 | 0.169327 | 1.209156 |
| OID30683 | SOD3               | Inflammat<br>ion_II | 4.4333  | 5.9661   | 6.00705 | 7.03E-07 | 1.25E-05 | 3.316818 | 1.26E-06 | 2.51E-05 | 3.622034 |
| OID30684 | F10                | Inflammat<br>ion_II | 1.3661  | 1.6038   | 1.56785 | 0.921974 | 0.933881 | 1.092513 | 0.336103 | 0.418414 | 1.174503 |
| OID30685 | SHBG               | Inflammat<br>ion_II | 1.7073  | 1.8606   | 1.70365 | 0.054314 | 0.085809 | -1.27143 | 0.391942 | 0.470845 | 1.073856 |
| OID30686 | APOA2              | Inflammat<br>ion_II | -2.9282 | -2.69755 | -2.865  | 0.492363 | 0.566089 | -1.08798 | 0.781844 | 0.827878 | 1.034404 |



|          |        |                     |          |          |          |          |          |          |          |          |          |
|----------|--------|---------------------|----------|----------|----------|----------|----------|----------|----------|----------|----------|
| OID30687 | TCN1   | Inflammat<br>ion_II | 5.0403   | 4.82625  | 4.7858   | 0.40707  | 0.481409 | 1.002672 | 0.395867 | 0.474522 | -1.10168 |
| OID30688 | PEPD   | Inflammat<br>ion_II | 3.27965  | 3.53645  | 3.6937   | 0.085833 | 0.12858  | 1.273633 | 0.07592  | 0.119943 | 1.143138 |
| OID30689 | RNASE6 | Inflammat<br>ion_II | 8.2307   | 8.66345  | 8.93555  | 2.66E-06 | 2.86E-05 | 1.424346 | 1.41E-06 | 2.71E-05 | 1.529966 |
| OID30690 | FCN1   | Inflammat<br>ion_II | -3.37545 | -4.29525 | -3.04155 | 0.648703 | 0.709939 | -2.17943 | 0.250663 | 0.325713 | -1.28886 |
| OID30691 | TGOLN2 | Inflammat<br>ion_II | 4.33885  | 4.96815  | 4.8483   | 0.000276 | 0.00096  | 1.602862 | 0.001359 | 0.00439  | 1.689504 |
| OID30692 | VASP   | Inflammat<br>ion_II | -0.26015 | 0.0077   | -0.06455 | 0.046312 | 0.075791 | 1.1776   | 0.060309 | 0.09928  | 1.011783 |
| OID30693 | PNLIP  | Inflammat<br>ion_II | 2.9978   | 2.3188   | 2.53925  | 0.000538 | 0.001722 | -1.60103 | 0.048741 | 0.082334 | -1.2485  |
| OID30694 | MRC1   | Inflammat<br>ion_II | 3.218    | 3.4426   | 3.4552   | 0.016212 | 0.031011 | 1.405857 | 0.024485 | 0.046514 | 1.16538  |
| OID30696 | ACE    | Inflammat<br>ion_II | 3.8301   | 3.8656   | 3.8009   | 0.973669 | 0.976336 | -1.00166 | 0.983867 | 0.987464 | -1.00692 |
| OID30697 | CR1    | Inflammat<br>ion_II | 0.6946   | 0.67095  | 0.74275  | 0.554059 | 0.623317 | -1.06925 | 0.383168 | 0.462328 | 1.078181 |
| OID30698 | C9     | Inflammat<br>ion_II | 1.595    | 2.0421   | 2.6594   | 0.505953 | 0.579287 | 1.413675 | 0.01384  | 0.029622 | 1.687632 |
| OID30699 | PGA4   | Inflammat<br>ion_II | 4.37665  | 4.12005  | 4.4284   | 0.191221 | 0.256363 | -1.14572 | 0.26632  | 0.344023 | 1.008178 |
| OID30700 | GSR    | Inflammat<br>ion_II | 3.7806   | 4.4051   | 4.45575  | 2.86E-05 | 0.000149 | 1.671334 | 0.003156 | 0.008751 | 1.399877 |
| OID30701 | APOF   | Inflammat<br>ion_II | -1.2824  | -2.7079  | -2.1926  | 0.009325 | 0.019103 | -1.47903 | 0.321839 | 0.405716 | -1.21008 |
| OID30702 | FGL1   | Inflammat<br>ion_II | -2.97685 | -2.9969  | -3.23845 | 0.390925 | 0.46656  | -1.19823 | 0.256811 | 0.332522 | -1.16866 |
| OID30703 | DBH    | Inflammat<br>ion_II | -0.2963  | 0.54545  | 0.8353   | 0.000686 | 0.002075 | 1.819006 | 0.000309 | 0.001369 | 1.724765 |

|          |                           |                 |          |         |         |          |          |          |          |          |          |
|----------|---------------------------|-----------------|----------|---------|---------|----------|----------|----------|----------|----------|----------|
| OID30704 | PON1                      | Inflammation_II | -0.17125 | -0.2547 | -0.2148 | 0.857083 | 0.885303 | 1.011468 | 0.183122 | 0.252281 | 1.110878 |
| OID30705 | RNASE4                    | Inflammation_II | 4.0091   | 4.14805 | 4.38535 | 0.592314 | 0.657594 | 1.134652 | 0.489146 | 0.564755 | 1.297334 |
| OID30706 | AHSG                      | Inflammation_II | 0.5989   | 1.45195 | 1.3854  | 0.01562  | 0.030036 | 1.700725 | 0.01603  | 0.033085 | 1.724885 |
| OID30707 | AMY1A_A<br>MY1B_A<br>MY1C | Inflammation_II | 4.34595  | 4.50845 | 4.44505 | 0.488035 | 0.56229  | -1.04073 | 0.490185 | 0.564767 | 1.053325 |
| OID30708 | APOL1                     | Inflammation_II | -4.21585 | -4.7216 | -4.737  | 0.000141 | 0.000544 | -1.85221 | 0.024323 | 0.046363 | -1.43779 |
| OID30709 | AGT                       | Inflammation_II | 0.51455  | 1.06315 | 1.26485 | 0.015035 | 0.029014 | 1.309395 | 0.009131 | 0.021018 | 1.475905 |
| OID30710 | CTBS                      | Inflammation_II | 4.9689   | 5.45765 | 5.72825 | 0.000306 | 0.001036 | 1.628507 | 0.000689 | 0.002547 | 1.866842 |
| OID30711 | VNN1                      | Inflammation_II | 2.1588   | 2.6093  | 2.5854  | 0.046579 | 0.076107 | 1.269579 | 0.007069 | 0.01721  | 1.482621 |
| OID30712 | CAT                       | Inflammation_II | 0.4906   | 1.2862  | 1.102   | 0.012641 | 0.025329 | 1.573907 | 0.110966 | 0.166904 | 1.3764   |
| OID30713 | MST1                      | Inflammation_II | 1.67685  | 1.5732  | 1.80795 | 0.323432 | 0.394587 | -1.07449 | 0.843679 | 0.879733 | 1.117248 |
| OID30714 | GSN                       | Inflammation_II | 1.3843   | 1.20555 | 1.3051  | 0.516259 | 0.589244 | -1.10623 | 0.539346 | 0.611147 | 1.005212 |
| OID30715 | CRISP3                    | Inflammation_II | 0.69045  | 1.6452  | 1.6972  | 0.014626 | 0.028324 | 1.741765 | 0.067773 | 0.108794 | 2.217448 |
| OID30716 | CFHR5                     | Inflammation_II | -1.19015 | -2.2878 | -2.0146 | 0.000241 | 0.000866 | -2.53178 | 0.001859 | 0.00567  | -2.23101 |
| OID30717 | BCHE                      | Inflammation_II | 1.8851   | 1.70915 | 1.9003  | 0.655178 | 0.712969 | -1.0279  | 0.836074 | 0.872633 | 1.005038 |
| OID30718 | HGFAC                     | Inflammation_II | 0.8557   | 1.39775 | 1.33855 | 0.000304 | 0.001036 | 1.296435 | 9.14E-05 | 0.000503 | 1.397502 |

|          |          |                     |         |         |         |          |          |          |          |          |          |
|----------|----------|---------------------|---------|---------|---------|----------|----------|----------|----------|----------|----------|
| OID30719 | C8B      | Inflammat<br>ion_II | 4.92    | 5.7457  | 5.86875 | 0.046222 | 0.075791 | 1.523881 | 0.018305 | 0.036947 | 1.617146 |
| OID30720 | CFHR2    | Inflammat<br>ion_II | 8.1911  | 8.94265 | 8.7562  | 0.000956 | 0.002771 | 1.442779 | 0.001207 | 0.003968 | 1.646954 |
| OID30721 | C1RL     | Inflammat<br>ion_II | 7.5192  | 7.8596  | 8.0802  | 0.744873 | 0.793278 | 1.201678 | 0.130473 | 0.190528 | 1.210791 |
| OID30722 | ITIH1    | Inflammat<br>ion_II | 5.65505 | 6.25015 | 6.27345 | 3.31E-05 | 0.000166 | 1.641085 | 1.2E-05  | 0.000116 | 1.661746 |
| OID30723 | F2       | Inflammat<br>ion_II | 2.95335 | 3.9319  | 4.04825 | 4.11E-05 | 0.000195 | 1.970484 | 3.95E-05 | 0.000263 | 1.96149  |
| OID30724 | SERPINA7 | Inflammat<br>ion_II | 7.4142  | 8.39515 | 8.60835 | 8.37E-06 | 5.89E-05 | 1.91926  | 3.13E-05 | 0.000223 | 2.05281  |
| OID30725 | B2M      | Inflammat<br>ion_II | 6.27155 | 7.67055 | 7.44825 | 7.69E-05 | 0.000332 | 2.911273 | 0.00062  | 0.002373 | 2.947312 |
| OID30726 | SAA4     | Inflammat<br>ion_II | 6.1123  | 6.726   | 6.8927  | 3.42E-05 | 0.000169 | 1.523353 | 1.96E-06 | 3.32E-05 | 1.736401 |
| OID30727 | APOE     | Inflammat<br>ion_II | 5.20535 | 7.36205 | 7.2309  | 7.95E-07 | 1.28E-05 | 4.13432  | 2.35E-06 | 3.69E-05 | 3.966867 |
| OID30728 | LYVE1    | Inflammat<br>ion_II | 7.34655 | 7.96915 | 8.13255 | 9.84E-05 | 0.000406 | 1.590136 | 0.000117 | 0.000602 | 1.818186 |
| OID30729 | QSOX1    | Inflammat<br>ion_II | 7.6191  | 8.3032  | 8.46025 | 0.020106 | 0.03759  | 1.619951 | 0.00596  | 0.014941 | 1.515612 |
| OID30730 | PZP      | Inflammat<br>ion_II | 2.48655 | 2.95125 | 3.17315 | 0.00168  | 0.004372 | 1.737003 | 0.000126 | 0.000636 | 2.047197 |
| OID30731 | C1S      | Inflammat<br>ion_II | 6.2831  | 7.50435 | 7.5971  | 1.67E-06 | 2.06E-05 | 2.375284 | 7.76E-06 | 8.6E-05  | 2.709262 |
| OID30732 | CLU      | Inflammat<br>ion_II | 3.92495 | 5.58665 | 5.8021  | 5.3E-06  | 4.62E-05 | 3.171466 | 3.82E-05 | 0.000258 | 3.479307 |
| OID30733 | APOA4    | Inflammat<br>ion_II | 5.65425 | 6.0662  | 6.1224  | 0.380873 | 0.457048 | 1.291323 | 0.059067 | 0.097821 | 1.249672 |
| OID30734 | CPB2     | Inflammat<br>ion_II | 6.30845 | 7.54815 | 7.66805 | 7.89E-07 | 1.28E-05 | 2.182906 | 2.85E-06 | 4.23E-05 | 2.499605 |

|          |          |                     |          |          |          |          |          |          |          |          |          |
|----------|----------|---------------------|----------|----------|----------|----------|----------|----------|----------|----------|----------|
| OID30735 | ATRN     | Inflammat<br>ion_II | 7.39785  | 8.0551   | 8.08395  | 0.000654 | 0.002016 | 1.597427 | 0.001765 | 0.005443 | 1.802876 |
| OID30736 | ECM1     | Inflammat<br>ion_II | 7.0941   | 7.33225  | 7.5877   | 0.316098 | 0.386929 | 1.227183 | 0.164975 | 0.230168 | 1.219255 |
| OID30737 | PROS1    | Inflammat<br>ion_II | 6.86255  | 7.35735  | 7.4334   | 0.388601 | 0.464291 | 1.278631 | 0.130489 | 0.190528 | 1.34048  |
| OID30738 | CFD      | Inflammat<br>ion_II | 7.31725  | 8.55935  | 8.64215  | 5.36E-06 | 4.63E-05 | 2.449437 | 2.17E-05 | 0.00017  | 2.668816 |
| OID30739 | F12      | Inflammat<br>ion_II | 6.36115  | 7.12405  | 7.27005  | 0.000303 | 0.001036 | 1.670697 | 0.0002   | 0.000954 | 1.574125 |
| OID30740 | IGLC2    | Inflammat<br>ion_II | 6.31975  | 7.38455  | 7.36605  | 7.88E-06 | 5.72E-05 | 1.864708 | 1.58E-05 | 0.000135 | 2.065226 |
| OID30741 | AFM      | Inflammat<br>ion_II | 5.72645  | 6.59335  | 6.79375  | 8.09E-05 | 0.000346 | 1.860577 | 9E-05    | 0.000502 | 2.117556 |
| OID30742 | PGLYRP2  | Inflammat<br>ion_II | 3.62295  | 4.52955  | 4.54915  | 0.002306 | 0.00569  | 1.889298 | 0.001041 | 0.003506 | 2.097761 |
| OID30743 | SERPINA6 | Inflammat<br>ion_II | 4.74265  | 5.92315  | 5.86445  | 1.72E-05 | 0.000101 | 2.326966 | 6.2E-05  | 0.000372 | 2.490612 |
| OID30744 | C5       | Inflammat<br>ion_II | 5.1532   | 5.68205  | 5.80695  | 0.000117 | 0.000471 | 1.596209 | 2.31E-05 | 0.000177 | 1.594053 |
| OID30745 | SELENOP  | Inflammat<br>ion_II | 6.90525  | 6.8029   | 7.00985  | 0.50141  | 0.57544  | -1.00993 | 0.889331 | 0.917749 | 1.153326 |
| OID30746 | APOD     | Inflammat<br>ion_II | 5.59645  | 6.33935  | 6.54765  | 8.29E-05 | 0.000353 | 1.674929 | 0.000344 | 0.001474 | 1.814787 |
| OID30747 | LPA      | Inflammat<br>ion_II | -1.47705 | -1.04705 | -0.57475 | 0.012902 | 0.025695 | 1.284538 | 0.007357 | 0.017754 | 1.588538 |
| OID30748 | ADIPOQ   | Inflammat<br>ion_II | 4.344    | 5.0964   | 5.45835  | 8.16E-06 | 5.78E-05 | 1.783672 | 5.36E-06 | 6.54E-05 | 1.823361 |
| OID30749 | APOC1    | Inflammat<br>ion_II | 2.21105  | 3.1054   | 3.12075  | 0.000551 | 0.001754 | 1.750843 | 9.61E-05 | 0.000517 | 1.878655 |
| OID30750 | SERPINA1 | Inflammat<br>ion_II | -0.0077  | 1.32345  | 1.30585  | 3.41E-06 | 3.44E-05 | 2.485352 | 2.11E-05 | 0.000167 | 2.57273  |

|          |          |                     |         |         |          |          |          |          |          |          |          |
|----------|----------|---------------------|---------|---------|----------|----------|----------|----------|----------|----------|----------|
| OID30751 | LRG1     | Inflammat<br>ion_II | 2.30225 | 3.63535 | 3.64675  | 1.92E-05 | 0.000111 | 2.607378 | 0.000117 | 0.000602 | 2.501598 |
| OID30752 | SELL     | Inflammat<br>ion_II | 6.78055 | 7.85255 | 7.91785  | 8.4E-07  | 1.3E-05  | 1.931404 | 1.55E-06 | 2.89E-05 | 2.239536 |
| OID30753 | C1R      | Inflammat<br>ion_II | 5.29925 | 6.58575 | 6.6755   | 6.06E-06 | 4.93E-05 | 2.365754 | 2.77E-05 | 0.000203 | 2.846522 |
| OID30754 | BTD      | Inflammat<br>ion_II | 4.3173  | 5.95055 | 5.87605  | 2.53E-06 | 2.83E-05 | 3.267755 | 1.06E-05 | 0.000105 | 3.401332 |
| OID30755 | CFB      | Inflammat<br>ion_II | 4.82225 | 6.15725 | 6.26655  | 2.6E-07  | 6.79E-06 | 2.434373 | 6.44E-07 | 1.86E-05 | 2.616068 |
| OID30756 | CLEC3B   | Inflammat<br>ion_II | 6.5119  | 7.21905 | 7.24675  | 0.008704 | 0.018135 | 1.557789 | 0.008374 | 0.019688 | 1.669019 |
| OID30757 | SERPINF1 | Inflammat<br>ion_II | 3.7767  | 5.11    | 4.90995  | 1.33E-05 | 8.48E-05 | 2.557085 | 5.81E-05 | 0.000353 | 2.562941 |
| OID30758 | CFHR4    | Inflammat<br>ion_II | 5.10995 | 4.3681  | 4.67905  | 0.00614  | 0.013271 | -1.41172 | 0.044613 | 0.076539 | -1.15081 |
| OID30759 | MBL2     | Inflammat<br>ion_II | 5.94885 | 6.37395 | 6.43645  | 0.005216 | 0.011594 | 1.394889 | 0.029486 | 0.05405  | 1.450651 |
| OID30760 | KLKB1    | Inflammat<br>ion_II | 4.83675 | 5.72045 | 5.85705  | 1.65E-06 | 2.06E-05 | 1.663532 | 1.19E-06 | 2.48E-05 | 1.90356  |
| OID30761 | PPBP     | Inflammat<br>ion_II | 5.87045 | 5.74015 | 5.82645  | 0.181444 | 0.245654 | -1.43998 | 0.289659 | 0.37025  | -1.31185 |
| OID30762 | ITIH4    | Inflammat<br>ion_II | 3.4822  | 3.93215 | 4.0339   | 0.031308 | 0.054221 | 1.253186 | 0.020044 | 0.04008  | 1.26659  |
| OID30763 | SERPINA5 | Inflammat<br>ion_II | 6.1802  | 7.35875 | 7.43585  | 5.53E-06 | 4.74E-05 | 2.24848  | 7.29E-06 | 8.34E-05 | 2.458196 |
| OID30764 | PF4      | Inflammat<br>ion_II | -0.4101 | -0.55   | -0.50355 | 0.956014 | 0.962148 | -1.47928 | 0.938398 | 0.952274 | -1.1103  |
| OID30765 | LGALS3BP | Inflammat<br>ion_II | 4.9376  | 6.47555 | 6.55705  | 9.35E-06 | 6.5E-05  | 2.337149 | 1.87E-05 | 0.000151 | 2.773101 |
| OID30766 | C7       | Inflammat<br>ion_II | 6.30895 | 7.27745 | 7.41375  | 1.56E-05 | 9.5E-05  | 1.831658 | 1.63E-05 | 0.000137 | 1.950576 |

|          |          |                     |          |         |         |          |          |          |          |          |          |
|----------|----------|---------------------|----------|---------|---------|----------|----------|----------|----------|----------|----------|
| OID30767 | SERPIND1 | Inflammat<br>ion_II | 3.7737   | 4.1817  | 4.32445 | 0.068716 | 0.10597  | 1.549551 | 0.008166 | 0.019241 | 1.331682 |
| OID30768 | ORM1     | Inflammat<br>ion_II | 0.07575  | 1.70595 | 1.66105 | 6.73E-06 | 5.2E-05  | 3.078548 | 3.65E-05 | 0.000252 | 2.702791 |
| OID30769 | APOA1    | Inflammat<br>ion_II | 2.6766   | 3.84175 | 3.9129  | 1.7E-05  | 0.000101 | 2.085148 | 4.33E-05 | 0.000285 | 2.344695 |
| OID30770 | HRG      | Inflammat<br>ion_II | 3.53935  | 5.07115 | 5.3094  | 8.02E-06 | 5.75E-05 | 2.358468 | 1.54E-05 | 0.000134 | 2.584885 |
| OID30771 | A1BG     | Inflammat<br>ion_II | 3.7678   | 4.77065 | 4.87535 | 1.75E-05 | 0.000102 | 2.231633 | 6.33E-05 | 0.000378 | 2.044503 |
| OID30772 | CFI      | Inflammat<br>ion_II | 5.53665  | 6.6334  | 6.58405 | 8.62E-05 | 0.000365 | 2.273713 | 0.000184 | 0.000888 | 2.066802 |
| OID30773 | F11      | Inflammat<br>ion_II | 5.84805  | 6.73465 | 6.8758  | 4.89E-07 | 1.03E-05 | 1.758567 | 3.01E-08 | 3.19E-06 | 1.965232 |
| OID30774 | SERPINA4 | Inflammat<br>ion_II | 3.45425  | 5.1965  | 5.01595 | 2.2E-06  | 2.58E-05 | 3.124553 | 1.93E-05 | 0.000155 | 3.172895 |
| OID30775 | CD5L     | Inflammat<br>ion_II | 4.74135  | 5.0994  | 5.30765 | 0.071876 | 0.11038  | 1.351068 | 0.124371 | 0.183548 | 1.460639 |
| OID30776 | C3       | Inflammat<br>ion_II | 1.7051   | 2.86045 | 2.7215  | 9.11E-05 | 0.000382 | 2.303456 | 0.000595 | 0.002309 | 2.022865 |
| OID30777 | SERPING1 | Inflammat<br>ion_II | 0.0637   | 1.66765 | 1.73435 | 2.02E-05 | 0.000115 | 2.868109 | 9.64E-05 | 0.000517 | 3.127912 |
| OID30778 | APCS     | Inflammat<br>ion_II | 2.66155  | 1.71635 | 2.546   | 0.053081 | 0.084345 | -1.22837 | 0.332374 | 0.416131 | -1.23478 |
| OID30779 | SERPINF2 | Inflammat<br>ion_II | 5.29035  | 6.6359  | 6.71025 | 1.51E-05 | 9.32E-05 | 2.452495 | 4.13E-05 | 0.000273 | 2.492338 |
| OID30780 | GC       | Inflammat<br>ion_II | -0.15535 | 1.48365 | 1.2456  | 9.91E-06 | 6.84E-05 | 2.908247 | 8.01E-05 | 0.000461 | 2.972033 |
| OID30781 | F13B     | Inflammat<br>ion_II | 4.72805  | 3.73305 | 4.41325 | 0.002704 | 0.006539 | -1.9373  | 0.025758 | 0.048182 | -1.26396 |
| OID30782 | TTR      | Inflammat<br>ion_II | -0.30215 | 1.86985 | 1.6858  | 3.22E-06 | 3.33E-05 | 4.081643 | 5.32E-06 | 6.54E-05 | 4.157453 |

|          |          |                     |         |         |         |          |          |          |          |          |          |
|----------|----------|---------------------|---------|---------|---------|----------|----------|----------|----------|----------|----------|
| OID30784 | CFP      | Inflammat<br>ion_II | 3.85925 | 4.77815 | 4.74225 | 5.88E-08 | 2.93E-06 | 1.643589 | 3.2E-08  | 3.19E-06 | 1.800565 |
| OID30785 | PLG      | Inflammat<br>ion_II | 2.51485 | 4.09275 | 4.08145 | 1.63E-06 | 2.06E-05 | 2.605481 | 1.37E-05 | 0.000123 | 2.678082 |
| OID30786 | SERPINA3 | Inflammat<br>ion_II | 0.33555 | 1.94225 | 1.81845 | 1.45E-05 | 9.02E-05 | 2.807819 | 4.91E-05 | 0.000312 | 2.702323 |
| OID30787 | FN1      | Inflammat<br>ion_II | 2.3007  | 3.4611  | 3.54865 | 2.92E-05 | 0.000149 | 2.489662 | 2.51E-05 | 0.000189 | 2.431337 |
| OID30788 | FGA      | Inflammat<br>ion_II | 2.9047  | 1.5603  | 2.0004  | 0.002138 | 0.005397 | -1.58058 | 0.062688 | 0.102441 | -1.87164 |
| OID30789 | SERPINC1 | Inflammat<br>ion_II | 0.44765 | 2.1224  | 1.81175 | 4.46E-06 | 4.05E-05 | 3.19264  | 3.73E-05 | 0.000254 | 3.273196 |
| OID30790 | CFH      | Inflammat<br>ion_II | 4.36005 | 5.42175 | 5.40985 | 1.95E-05 | 0.000112 | 2.269147 | 7.44E-05 | 0.000432 | 2.146297 |
